# Supplementary material for: Rationalization of the mechanism and chemoselectivity of versatile Au-catalyzed reactions of diazoesters with allyl-functionalized sulfides, selenides, amines, or ethers by DFT
Source: Royal Society of Chemistry journal article supplement (doi:10.1039/d1qo00920f), 2021-01-01
Supplement: d1qo00920f1.pdf [file d1qo00920f1.pdf]

## Electronic Supplementary Information (ESI)

### **DFT rationalization of mechanism and chemoselectivity in versatile Au-catalyzed reactions of diazoesters with allyl-functionalized sulfides, selenides, amines, or ethers**

*Caicai Gao<sup>a</sup>, Teng Cao<sup>a</sup>, Alexander M. Kirillov<sup>b,c</sup>, Ran Fang<sup>\*a</sup>, and Lizi Yang<sup>d</sup>*

<sup>a</sup>Key Laboratory of Chemical Additives for China National Light Industry, College of Chemistry and Chemical Engineering, Shaanxi University of Science and Technology, Xi'an 710021, P. R. China.

<sup>b</sup>Centro de Química Estrutural and Departamento de Engenharia Química, Instituto Superior Técnico, Universidade de Lisboa, Av. Rovisco Pais, 1049-001, Lisbon, Portugal.

<sup>c</sup>Research Institute of Chemistry, Peoples' Friendship University of Russia (RUDN University), 6 Miklukho-Maklaya st., Moscow, 117198, Russian Federation.

<sup>d</sup>College of Chemistry and Chemical Engineering, Lanzhou University, Lanzhou 730000, P. R. China

\*Corresponding author.  
E-mail address:  
fangr@lzu.edu.cn (R. Fang).

## Table of contents

|                                                               |     |
|---------------------------------------------------------------|-----|
| 1. Scan results for A-1a.....                                 | S3  |
| 2. Scan results for B-1a.....                                 | S3  |
| 3. Additional calculation results for series A and B .....    | S4  |
| 4. Calculation results for series E.....                      | S4  |
| 5. Culation results for series F. ....                        | S5  |
| 6. Culation results for series G.....                         | S5  |
| 7. Additional calculation results for series C.....           | S6  |
| 8. Distortion/interaction analysis .....                      | S7  |
| 9. Additional calculation results for series D.....           | S8  |
| 10. Selected 3D structure diagrams in different pathways..... | S9  |
| 11. Cartesian coordinates of the stationary points.....       | S10 |

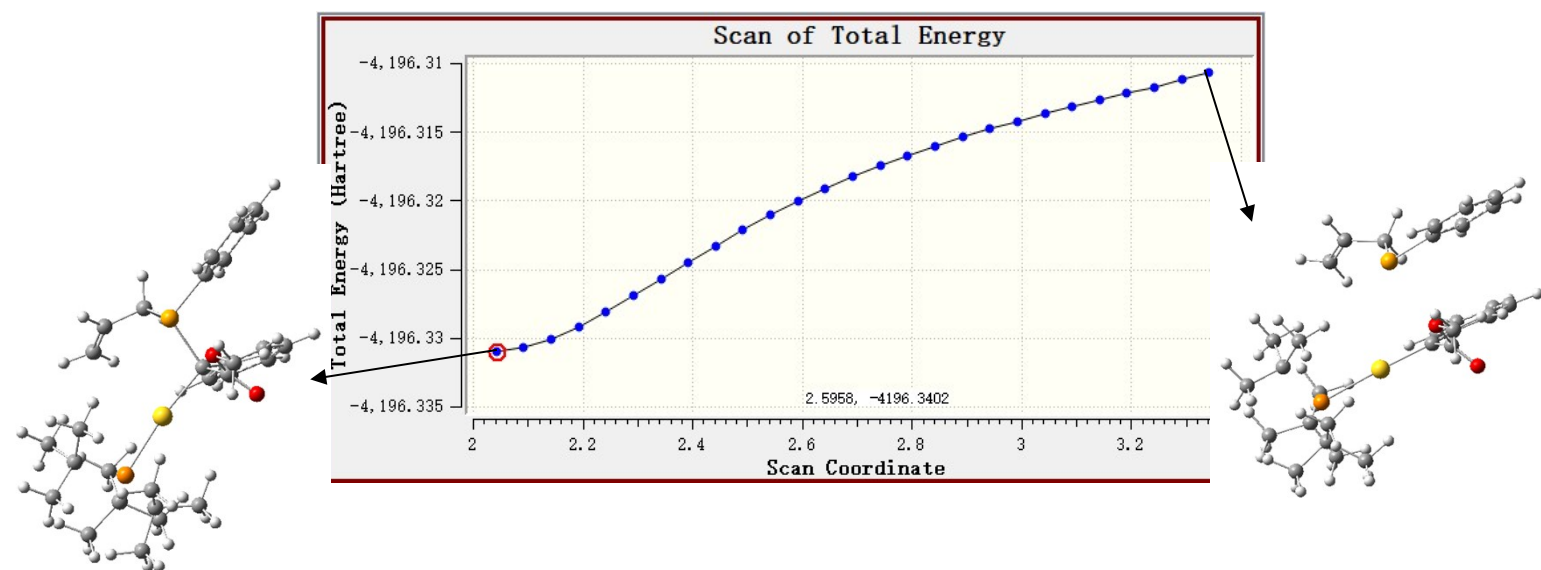

Figure S1. Scan results for A-1a.

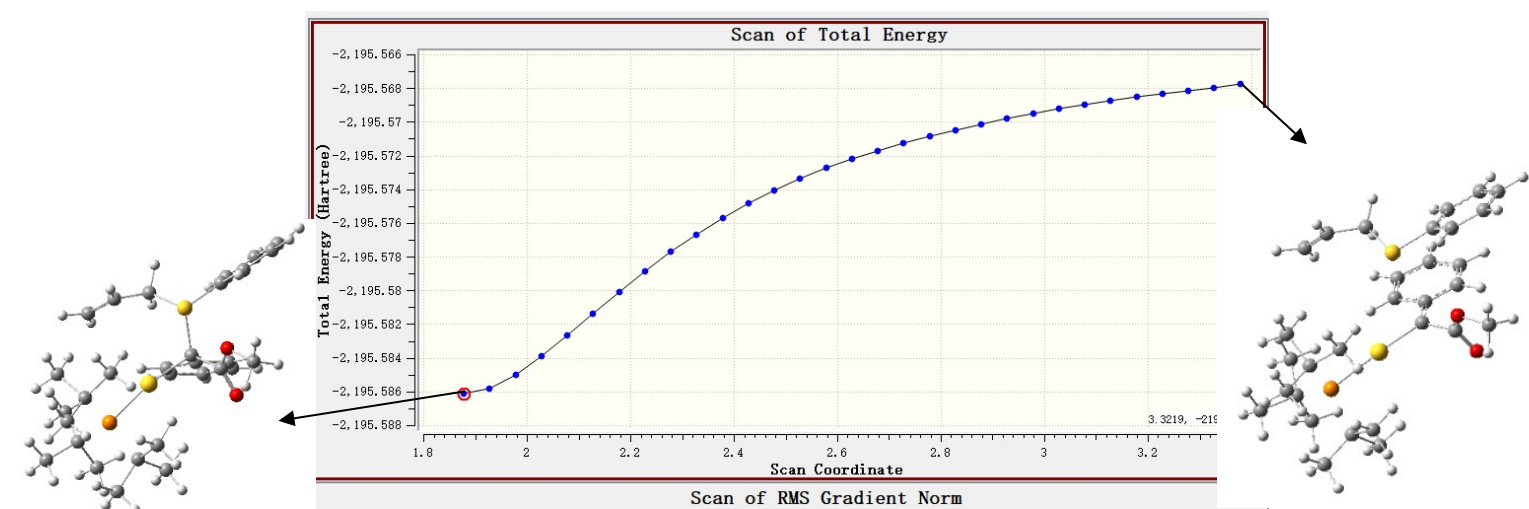

Figure S2. Scan results for B-1a.

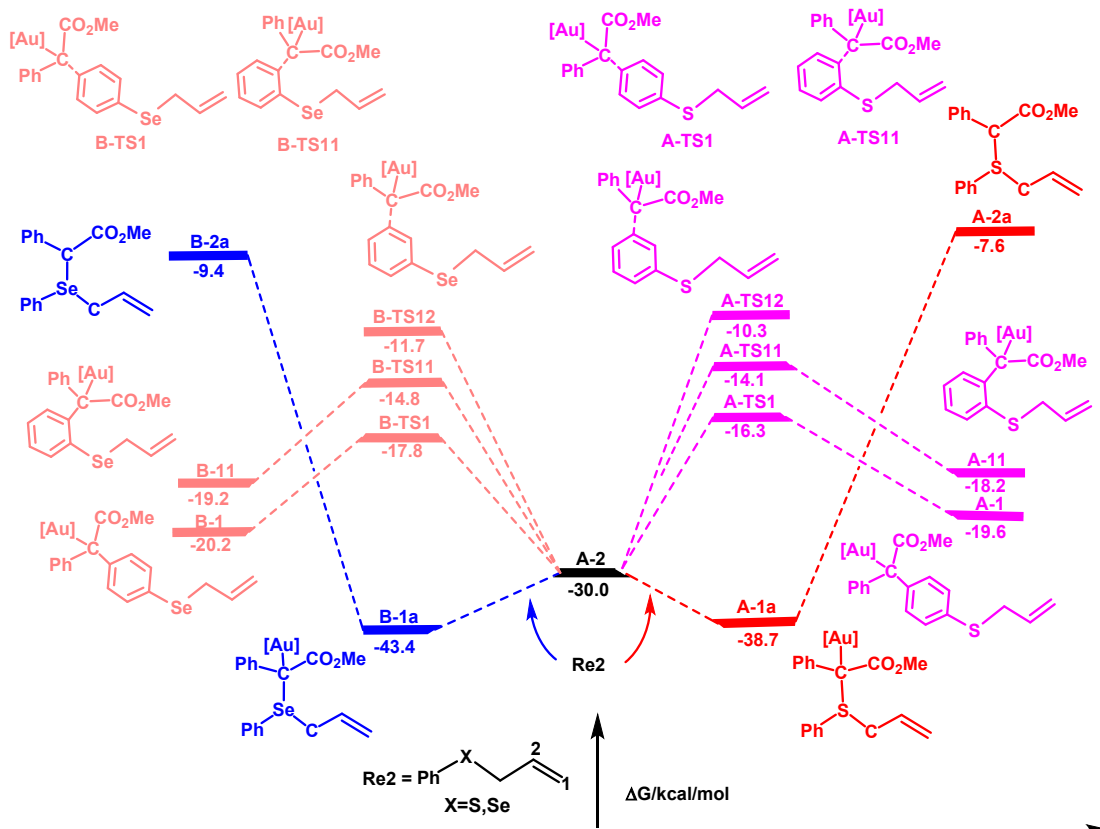

Figure S3. Additional calculation results for the series A and B. Relative energies are in kcal/mol.

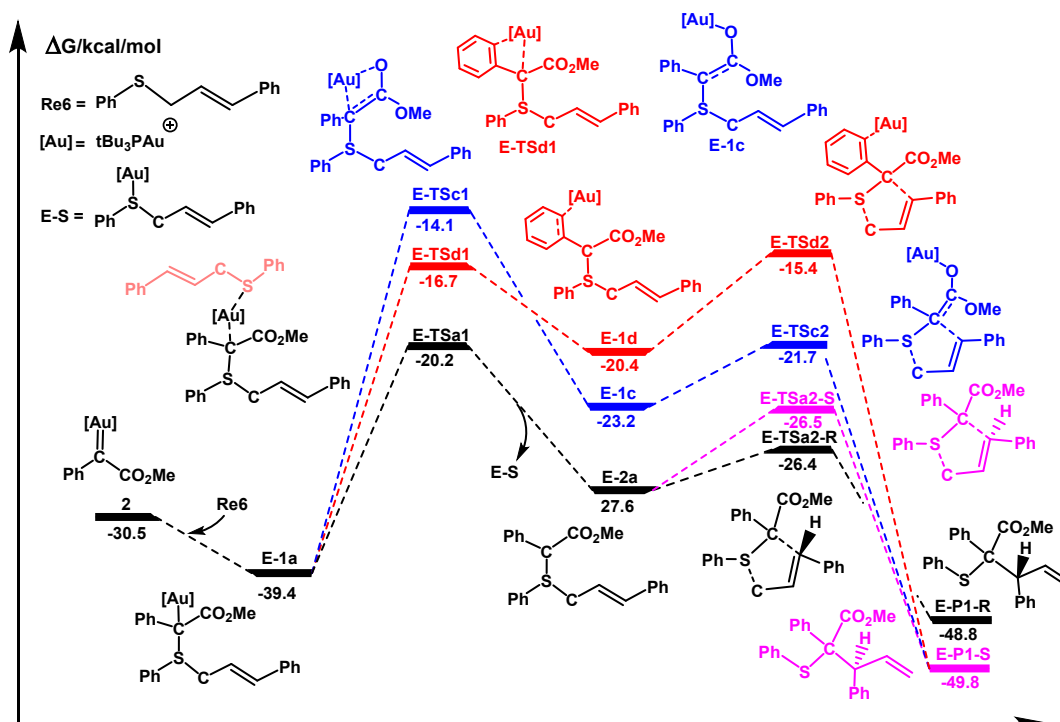

Figure S4 Computational energy profiles for the series E. Relative energies are in kcal/mol.

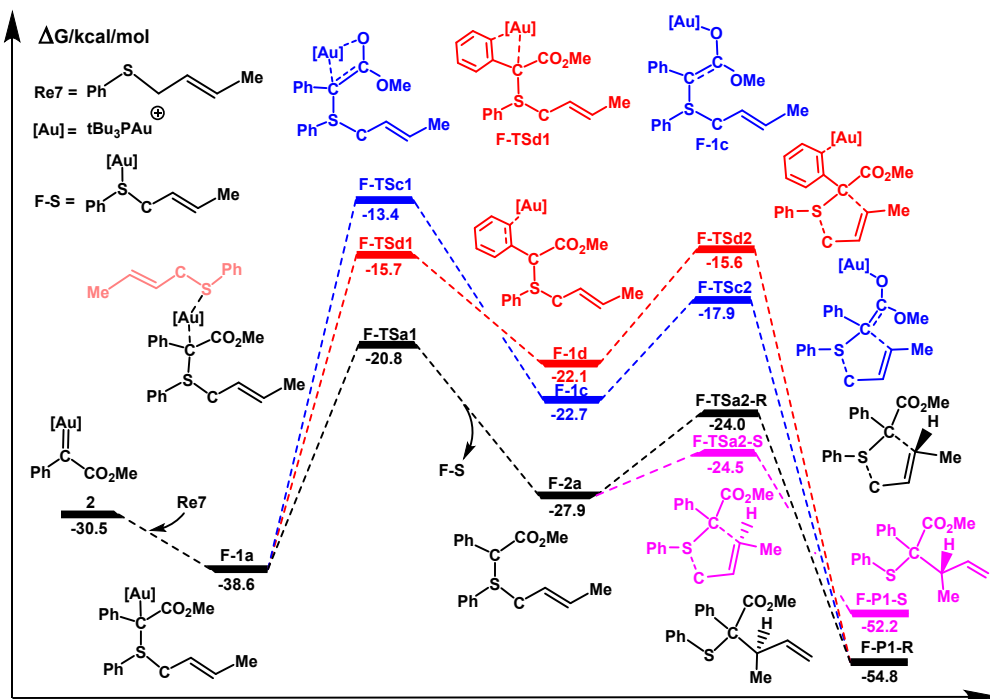

Figure S5 Computational energy profiles for the series F. Relative energies are in kcal/mol.

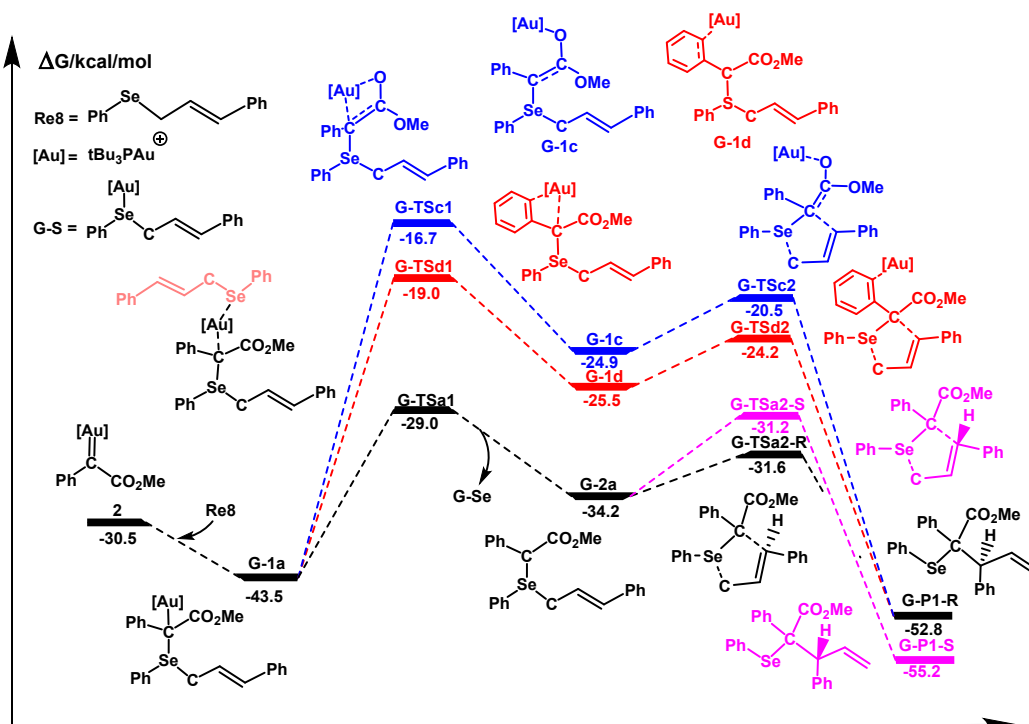

Figure S6 Computational energy profiles for the series G. Relative energies are in kcal/mol.

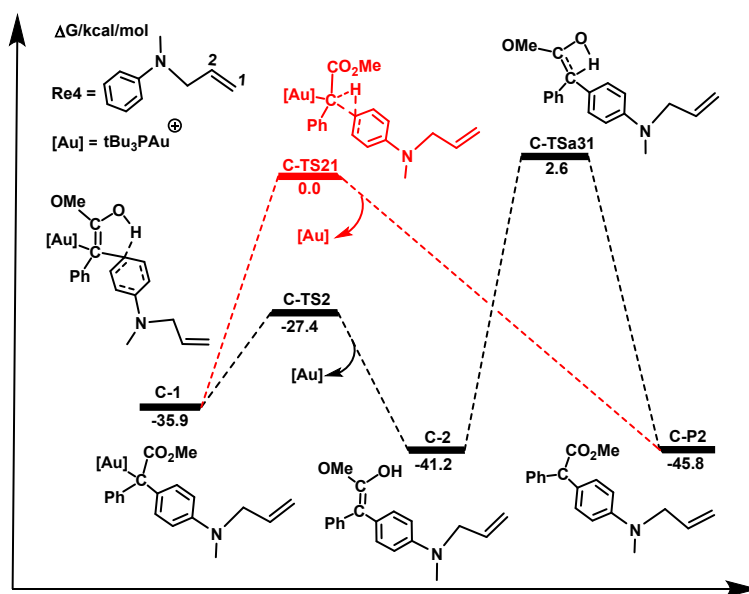

**Figure S7.** Additional calculation results for the series **C**. Relative energies are in kcal/mol.

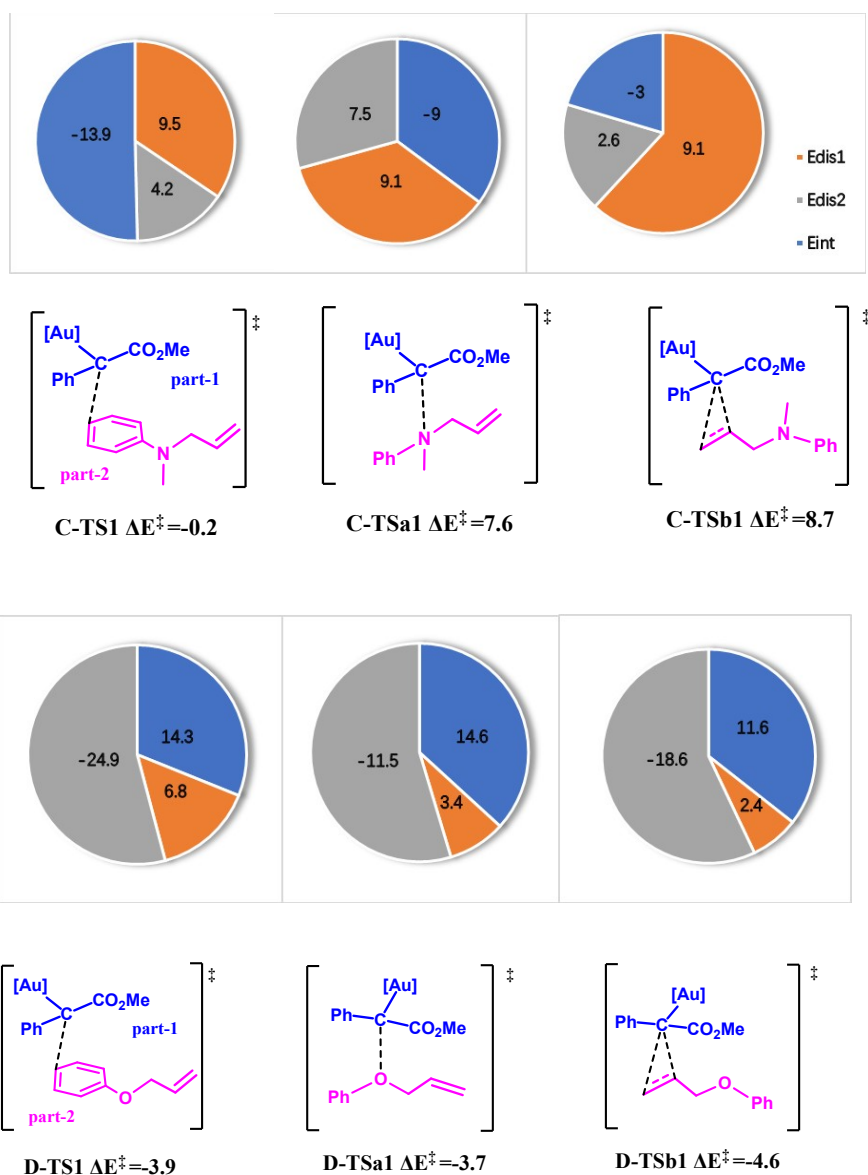

**Figure S8** Distortion/interaction analysis for the reaction in series C and D. The values are in kcal/mol.  $\Delta E^\ddagger$ , the activation energy.  $\Delta E_{dist-1}$ , the distortion energy of Part-1.  $\Delta E_{dist-2}$ , the distortion energy of Part-2.  $\Delta E_{int} = \Delta E^\ddagger - \Delta E_{dist}$ , the interaction energy.

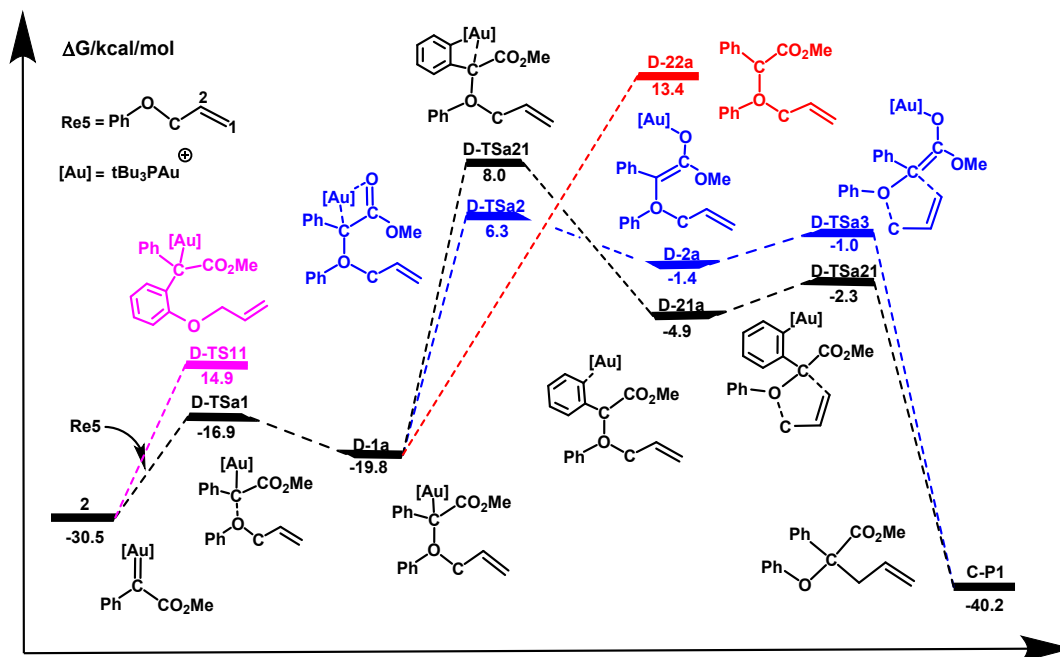

**Figure S9** Additional calculation results for the series **D**. Relative energies are in kcal/mol.

**Figure S10** Selected key intermediates and transition states for different pathways. Representative bond lengths are in Å.

**The Cartesian coordinates of the stationary points**

Rel

|   |          |          |         |
|---|----------|----------|---------|
| C | -1.63861 | 0.32449  | 0.00018 |
| C | -2.75918 | -0.62707 | 0.00027 |
| O | -2.61396 | -1.83352 | 0.00004 |



|                                              |                |          |                             |
|----------------------------------------------|----------------|----------|-----------------------------|
| O                                            | -3.95938       | -0.00044 | 0.00003                     |
| C                                            | -5.10285       | -0.87215 | -0.00022                    |
| H                                            | -5.10246       | -1.50677 | 0.88901                     |
| H                                            | -5.97045       | -0.21317 | -0.00039                    |
| H                                            | -5.1021        | -1.50674 | -0.88947                    |
| N                                            | -1.92649       | 1.60846  | 0.00015                     |
| N                                            | -2.13331       | 2.72834  | 0.00018                     |
| C                                            | -0.17546       | -0.15591 | 0.0001                      |
| C                                            | 0.11034        | -1.52148 | 0.00013                     |
| C                                            | 0.86405        | 0.77414  | -0.0001                     |
| C                                            | 1.43537        | -1.95682 | 0.00064                     |
| H                                            | -0.70941       | -2.25446 | 0.00107                     |
| C                                            | 2.18953        | 0.33883  | -0.00059                    |
| H                                            | 0.63897        | 1.85046  | -0.00031                    |
| C                                            | 2.47534        | -1.0264  | -0.00008                    |
| H                                            | 1.66072        | -3.03316 | 0.00129                     |
| H                                            | 3.00893        | 1.07236  | -0.00117                    |
| H                                            | 3.52           | -1.36988 | 0.00025                     |
| Zero-point correction=                       |                |          | 0.158236 (Hartree/Particle) |
| Thermal correction to Energy=                |                |          | 0.170018                    |
| Thermal correction to Enthalpy=              |                |          | 0.170962                    |
| Thermal correction to Gibbs Free Energy=     |                |          | 0.118793                    |
| Sum of electronic and zero-point Energies=   |                |          | -607.536620                 |
| Sum of electronic and thermal Energies=      |                |          | -607.524838                 |
| Sum of electronic and thermal Enthalpies=    |                |          | -607.523894                 |
| Sum of electronic and thermal Free Energies= |                |          | -607.576063                 |
| E(RB3LYP) =                                  | -607.901197369 | A.U      |                             |

A-re2

|   |             |             |             |
|---|-------------|-------------|-------------|
| C | -4.34130400 | -0.28104300 | 0.58034000  |
| H | -4.21952200 | -1.21685300 | 1.12027400  |
| C | -3.29638500 | 0.48294500  | 0.26028000  |
| H | -3.45180000 | 1.40831100  | -0.29256200 |
| S | -0.92846400 | -0.18481300 | -0.97296400 |
| C | 0.76247600  | -0.07354300 | -0.37231800 |
| C | 1.38116300  | 1.17416600  | -0.21215800 |
| C | 1.48562100  | -1.24128300 | -0.09713800 |
| C | 2.70084700  | 1.25108600  | 0.23303800  |
| H | 0.82706200  | 2.07825700  | -0.44522400 |
| C | 2.80938800  | -1.16052300 | 0.33853000  |
| H | 1.00740400  | -2.20665000 | -0.22843200 |
| C | 3.41722900  | 0.08422200  | 0.50776300  |
| H | 3.17267000  | 2.22179700  | 0.35547600  |
| H | 3.36392400  | -2.07075700 | 0.54785900  |

|                                              |                |             |                             |
|----------------------------------------------|----------------|-------------|-----------------------------|
| H                                            | 4.44679600     | 0.14539700  | 0.84806600                  |
| C                                            | -1.87560200    | 0.15153000  | 0.59595100                  |
| H                                            | -1.38152000    | 0.99348200  | 1.09104900                  |
| H                                            | -1.81443800    | -0.72472700 | 1.24661000                  |
| H                                            | -5.35574700    | 0.00341900  | 0.31858100                  |
| Zero-point correction=                       |                |             | 0.162752 (Hartree/Particle) |
| Thermal correction to Energy=                |                |             | 0.172709                    |
| Thermal correction to Enthalpy=              |                |             | 0.173653                    |
| Thermal correction to Gibbs Free Energy=     |                |             | 0.124868                    |
| Sum of electronic and zero-point Energies=   |                |             | -746.992678                 |
| Sum of electronic and thermal Energies=      |                |             | -746.982721                 |
| Sum of electronic and thermal Enthalpies=    |                |             | -746.981777                 |
| Sum of electronic and thermal Free Energies= |                |             | -747.030562                 |
| E(RB3LYP) =                                  | -747.314476070 | A.U         |                             |

#### CAT

|    |             |             |             |
|----|-------------|-------------|-------------|
| P  | 0.62653600  | -0.00024100 | -0.00014600 |
| Au | -1.70049900 | 0.00036300  | 0.00037000  |
| C  | 1.15131300  | 1.50436600  | -1.09820200 |
| C  | 0.26692800  | 1.56693100  | -2.36511900 |
| C  | 0.91926000  | 2.82196900  | -0.32910500 |
| C  | 2.63932100  | 1.40312900  | -1.50489000 |
| H  | 0.34555600  | 0.69038600  | -3.00426900 |
| H  | -0.78727700 | 1.72093800  | -2.11511900 |
| H  | 0.59217100  | 2.43130000  | -2.95390000 |
| H  | 1.59168800  | 2.95164100  | 0.51942000  |
| H  | 1.11443500  | 3.64742500  | -1.02159000 |
| H  | -0.11460800 | 2.92476000  | 0.01277600  |
| H  | 2.89702700  | 2.31204800  | -2.05905700 |
| H  | 3.31290900  | 1.34537600  | -0.64810000 |
| H  | 2.84033500  | 0.55825400  | -2.16547900 |
| C  | 1.15177800  | 0.19826400  | 1.85107300  |
| C  | 0.27203700  | 1.26864600  | 2.53794500  |
| C  | 0.91514000  | -1.12486100 | 2.60912300  |
| C  | 2.64092400  | 0.59673500  | 1.96581100  |
| H  | 0.35888500  | 2.26025700  | 2.10001300  |
| H  | -0.78409500 | 0.98230600  | 2.54306500  |
| H  | 0.59500200  | 1.34250800  | 3.58187000  |
| H  | 1.58456300  | -1.92742100 | 2.29773700  |
| H  | 1.11135400  | -0.93721300 | 3.66986800  |
| H  | -0.12020900 | -1.46806300 | 2.52759100  |
| H  | 2.89908600  | 0.62394500  | 3.02989200  |
| H  | 3.31191100  | -0.11926800 | 1.48829700  |
| H  | 2.84465200  | 1.58958500  | 1.56204100  |

|                                              |                |             |                             |
|----------------------------------------------|----------------|-------------|-----------------------------|
| C                                            | 1.15042300     | -1.70345100 | -0.75397100                 |
| C                                            | 0.26763000     | -2.83191300 | -0.17169300                 |
| C                                            | 0.91487100     | -1.69770400 | -2.27907000                 |
| C                                            | 2.63877500     | -2.00529300 | -0.46532800                 |
| H                                            | 0.35275200     | -2.95001500 | 0.90629400                  |
| H                                            | -0.78788400    | -2.68980100 | -0.42322900                 |
| H                                            | 0.58856400     | -3.77324200 | -0.63048300                 |
| H                                            | 1.58355000     | -1.02547800 | -2.81750600                 |
| H                                            | 1.11273500     | -2.70965800 | -2.64730000                 |
| H                                            | -0.12076600    | -1.45698900 | -2.53605700                 |
| H                                            | 2.89464400     | -2.94172500 | -0.97240700                 |
| H                                            | 3.31218500     | -1.23623600 | -0.84755900                 |
| H                                            | 2.84183600     | -2.15158200 | 0.59669400                  |
| Zero-point correction=                       |                |             | 0.372082 (Hartree/Particle) |
| Thermal correction to Energy=                |                |             | 0.392010                    |
| Thermal correction to Enthalpy=              |                |             | 0.392954                    |
| Thermal correction to Gibbs Free Energy=     |                |             | 0.326369                    |
| Sum of electronic and zero-point Energies=   |                |             | -949.818631                 |
| Sum of electronic and thermal Energies=      |                |             | -949.798703                 |
| Sum of electronic and thermal Enthalpies=    |                |             | -949.797759                 |
| Sum of electronic and thermal Free Energies= |                |             | -949.864344                 |
| E(RB3LYP) =                                  | -950.516544585 | A.U.        |                             |

TS1

|   |             |             |             |
|---|-------------|-------------|-------------|
| C | -2.30969800 | -0.40876300 | 0.18781900  |
| C | -2.61044300 | -1.68505600 | -0.56080600 |
| O | -2.71812000 | -1.67001600 | -1.76680200 |
| O | -2.65395400 | -2.77767300 | 0.21215200  |
| C | -2.84108500 | -4.03406900 | -0.48736400 |
| H | -2.00116400 | -4.21535500 | -1.16051200 |
| H | -2.88498600 | -4.79183800 | 0.29253900  |
| H | -3.76944600 | -4.00982600 | -1.06027000 |
| N | -2.61227800 | -0.85236500 | 1.83100300  |
| N | -2.67385500 | -0.88239700 | 2.93755500  |
| C | -3.20124600 | 0.75550900  | -0.03477000 |
| C | -4.48142400 | 0.59890000  | -0.60422000 |
| C | -2.77501100 | 2.04535600  | 0.33967800  |
| C | -5.29745400 | 1.70637200  | -0.81077800 |
| H | -4.82522800 | -0.38250900 | -0.91113100 |
| C | -3.60129700 | 3.14774900  | 0.14788700  |
| H | -1.79236700 | 2.17351200  | 0.78441700  |
| C | -4.86221800 | 2.97957400  | -0.43156600 |
| H | -6.27492200 | 1.57758300  | -1.26407700 |
| H | -3.26289500 | 4.13632200  | 0.44094100  |

|    |             |             |             |
|----|-------------|-------------|-------------|
| H  | -5.50453600 | 3.84039300  | -0.58993500 |
| P  | 2.17408200  | 0.17565600  | -0.07914100 |
| Au | -0.18305400 | -0.13183900 | 0.16059300  |
| C  | 2.79287800  | -1.09037500 | -1.40539500 |
| C  | 2.11123900  | -2.45835100 | -1.15906900 |
| C  | 2.34251100  | -0.63408100 | -2.81093400 |
| C  | 4.32547000  | -1.27286900 | -1.40475600 |
| H  | 2.35533000  | -2.90509900 | -0.19724000 |
| H  | 1.02246400  | -2.38327700 | -1.23858400 |
| H  | 2.45081000  | -3.15110100 | -1.93729300 |
| H  | 2.86624900  | 0.25577500  | -3.16237900 |
| H  | 2.57363500  | -1.44008600 | -3.51578200 |
| H  | 1.26403800  | -0.45798300 | -2.86316000 |
| H  | 4.59598400  | -1.93581900 | -2.23425700 |
| H  | 4.86204600  | -0.33370600 | -1.55062100 |
| H  | 4.69394300  | -1.74100700 | -0.48987700 |
| C  | 2.47043600  | 1.99727800  | -0.66349800 |
| C  | 1.41541300  | 2.36423600  | -1.73553900 |
| C  | 2.23679800  | 2.96226800  | 0.51979000  |
| C  | 3.88343400  | 2.24136200  | -1.23431200 |
| H  | 1.48417000  | 1.76786000  | -2.64311900 |
| H  | 0.39552400  | 2.27876300  | -1.34840600 |
| H  | 1.57251900  | 3.41060100  | -2.02072100 |
| H  | 3.01333100  | 2.90230400  | 1.28345200  |
| H  | 2.24980100  | 3.98581200  | 0.12964400  |
| H  | 1.26261900  | 2.80602500  | 0.99313000  |
| H  | 3.97646400  | 3.30464700  | -1.48252300 |
| H  | 4.67659000  | 2.00460300  | -0.52250300 |
| H  | 4.06763000  | 1.68257100  | -2.15343900 |
| C  | 3.00860900  | -0.14796900 | 1.63714800  |
| C  | 2.15968000  | 0.51167100  | 2.75072600  |
| C  | 3.00529400  | -1.66222000 | 1.94015600  |
| C  | 4.45717800  | 0.37669800  | 1.71767500  |
| H  | 2.09821700  | 1.59550200  | 2.67598400  |
| H  | 1.14187600  | 0.10991800  | 2.77065900  |
| H  | 2.62413200  | 0.27759600  | 3.71518600  |
| H  | 3.67282900  | -2.23225000 | 1.29333200  |
| H  | 3.35795000  | -1.80164800 | 2.96789300  |
| H  | 2.00026900  | -2.09085800 | 1.88020900  |
| H  | 4.87258000  | 0.10080000  | 2.69336900  |
| H  | 5.10554100  | -0.05608800 | 0.95390900  |
| H  | 4.51419500  | 1.46385700  | 1.64154100  |

Zero-point correction= 0.528872 (Hartree/Particle)

Thermal correction to Energy= 0.562575

|                                              |                          |
|----------------------------------------------|--------------------------|
| Thermal correction to Enthalpy=              | 0.563520                 |
| Thermal correction to Gibbs Free Energy=     | 0.463328                 |
| Sum of electronic and zero-point Energies=   | -1557.373767             |
| Sum of electronic and thermal Energies=      | -1557.340063             |
| Sum of electronic and thermal Enthalpies=    | -1557.339119             |
| Sum of electronic and thermal Free Energies= | -1557.439311             |
| E(RB3LYP) =                                  | -1558.43876655      A.U. |

|    |             |             |             |
|----|-------------|-------------|-------------|
| 1  |             |             |             |
| C  | 2.45129500  | -0.54382400 | -0.33093100 |
| C  | 2.67544200  | -1.68316600 | 0.66258700  |
| O  | 2.72179300  | -1.51076200 | 1.85618600  |
| O  | 2.76776300  | -2.86206000 | 0.03664000  |
| C  | 2.94397400  | -4.02093900 | 0.89209900  |
| H  | 2.08551000  | -4.12656000 | 1.55788700  |
| H  | 3.01662500  | -4.86764000 | 0.21238700  |
| H  | 3.85596800  | -3.91369700 | 1.48109300  |
| N  | 2.64981800  | -0.98231200 | -1.61960300 |
| N  | 2.79578100  | -1.32469400 | -2.67758000 |
| C  | 3.06962100  | 0.81853200  | -0.06074300 |
| C  | 2.94073200  | 1.38013200  | 1.22008200  |
| C  | 3.74471400  | 1.53111600  | -1.06130800 |
| C  | 3.49553100  | 2.63129600  | 1.48727200  |
| H  | 2.43781100  | 0.82901000  | 2.00415500  |
| C  | 4.28658500  | 2.78614200  | -0.78441600 |
| H  | 3.87026200  | 1.12058700  | -2.05886200 |
| C  | 4.16515800  | 3.34106300  | 0.48972500  |
| H  | 3.40143500  | 3.04939500  | 2.48473200  |
| H  | 4.81219400  | 3.32278100  | -1.56788300 |
| H  | 4.59235900  | 4.31538400  | 0.70400900  |
| P  | -2.09662200 | 0.17624200  | 0.03679900  |
| Au | 0.21610400  | -0.22674400 | -0.21692900 |
| C  | -3.04371500 | -1.32957100 | -0.72661700 |
| C  | -2.37931400 | -1.72706400 | -2.06651400 |
| C  | -2.90619000 | -2.55249400 | 0.20594500  |
| C  | -4.54239600 | -1.04253300 | -0.96188900 |
| H  | -2.42939600 | -0.95279600 | -2.82946300 |
| H  | -1.33044900 | -2.00679000 | -1.92835100 |
| H  | -2.90598600 | -2.60493900 | -2.45707600 |
| H  | -3.46020900 | -2.44378600 | 1.13900000  |
| H  | -3.32135400 | -3.42201800 | -0.31489900 |
| H  | -1.86093500 | -2.77910800 | 0.43720200  |
| H  | -5.01337100 | -1.95851800 | -1.33560300 |
| H  | -5.06818400 | -0.75801100 | -0.04845700 |

|                                              |                |             |                             |
|----------------------------------------------|----------------|-------------|-----------------------------|
| H                                            | -4.71118300    | -0.26835400 | -1.71273700                 |
| C                                            | -2.43025400    | 0.33592000  | 1.93670100                  |
| C                                            | -1.64071900    | -0.75873200 | 2.69464100                  |
| C                                            | -1.88838300    | 1.69037400  | 2.44337400                  |
| C                                            | -3.92798500    | 0.22550200  | 2.29246400                  |
| H                                            | -1.94435800    | -1.77292200 | 2.44281900                  |
| H                                            | -0.56221300    | -0.67229600 | 2.53200300                  |
| H                                            | -1.82141300    | -0.62153100 | 3.76660000                  |
| H                                            | -2.46058100    | 2.54497600  | 2.08089400                  |
| H                                            | -1.96328200    | 1.69421500  | 3.53608000                  |
| H                                            | -0.83412600    | 1.83473800  | 2.18891500                  |
| H                                            | -4.04081500    | 0.40102200  | 3.36803900                  |
| H                                            | -4.54127900    | 0.96580500  | 1.77607000                  |
| H                                            | -4.33584200    | -0.76571900 | 2.08595000                  |
| C                                            | -2.50909000    | 1.82179900  | -0.89727800                 |
| C                                            | -1.39517800    | 2.86123100  | -0.62508700                 |
| C                                            | -2.50133300    | 1.56652100  | -2.42002700                 |
| C                                            | -3.87579500    | 2.41444600  | -0.49352800                 |
| H                                            | -1.31369000    | 3.15603300  | 0.41922000                  |
| H                                            | -0.41614600    | 2.50285500  | -0.95735200                 |
| H                                            | -1.62830000    | 3.76332900  | -1.20168100                 |
| H                                            | -3.33196200    | 0.94441800  | -2.75507600                 |
| H                                            | -2.60019700    | 2.53376400  | -2.92420300                 |
| H                                            | -1.56189700    | 1.11860700  | -2.75778000                 |
| H                                            | -4.06672000    | 3.29518200  | -1.11678900                 |
| H                                            | -4.70285100    | 1.72006200  | -0.65224000                 |
| H                                            | -3.90011800    | 2.74882100  | 0.54518400                  |
| Zero-point correction=                       |                |             | 0.530941 (Hartree/Particle) |
| Thermal correction to Energy=                |                |             | 0.564631                    |
| Thermal correction to Enthalpy=              |                |             | 0.565575                    |
| Thermal correction to Gibbs Free Energy=     |                |             | 0.464884                    |
| Sum of electronic and zero-point Energies=   |                |             | -1557.380504                |
| Sum of electronic and thermal Energies=      |                |             | -1557.346814                |
| Sum of electronic and thermal Enthalpies=    |                |             | -1557.345870                |
| Sum of electronic and thermal Free Energies= |                |             | -1557.446561                |
| E(RB3LYP) =                                  | -1558.44909250 | A.U.        |                             |

TS11

|   |             |             |             |
|---|-------------|-------------|-------------|
| C | -3.18752100 | -0.25391500 | 0.56895300  |
| C | -2.96239800 | -1.43791600 | -0.18234900 |
| O | -1.81853600 | -1.67243500 | -0.67472300 |
| O | -3.91686200 | -2.35659100 | -0.26073700 |
| C | -3.54606100 | -3.65902000 | -0.77611200 |
| H | -2.75540000 | -4.09777700 | -0.16445800 |

|    |             |             |             |
|----|-------------|-------------|-------------|
| H  | -4.45663900 | -4.25202500 | -0.71226900 |
| H  | -3.21259500 | -3.57638500 | -1.81160000 |
| N  | -4.97656700 | -0.55824500 | 1.28283300  |
| N  | -5.68271700 | -0.56339900 | 2.13849400  |
| C  | -3.18729800 | 1.09469600  | 0.06984400  |
| C  | -3.34432700 | 1.40007300  | -1.30634300 |
| C  | -3.00959900 | 2.15918600  | 0.98711000  |
| C  | -3.30196200 | 2.71720800  | -1.74522100 |
| H  | -3.49708500 | 0.59266800  | -2.01634300 |
| C  | -2.98838200 | 3.47684200  | 0.54672700  |
| H  | -2.89313300 | 1.92143200  | 2.03980700  |
| C  | -3.13114500 | 3.75371200  | -0.81853100 |
| H  | -3.41973600 | 2.94504800  | -2.79983400 |
| H  | -2.86164600 | 4.28876900  | 1.25561400  |
| H  | -3.11463200 | 4.78375300  | -1.16266000 |
| P  | 2.19165000  | 0.12234100  | 0.12773900  |
| Au | 0.06801500  | -0.71244400 | -0.27897300 |
| C  | 2.44999800  | 0.11861700  | 2.04421800  |
| C  | 1.16561500  | 0.63618300  | 2.73489000  |
| C  | 2.64914600  | -1.33254500 | 2.53385000  |
| C  | 3.65402100  | 0.97236200  | 2.49503000  |
| H  | 0.92730900  | 1.67069900  | 2.49528400  |
| H  | 0.29760400  | 0.01789300  | 2.48791000  |
| H  | 1.31781700  | 0.57755200  | 3.81845800  |
| H  | 3.60163700  | -1.76458200 | 2.22417200  |
| H  | 2.64284000  | -1.32289500 | 3.62916600  |
| H  | 1.83709700  | -1.98965300 | 2.20914400  |
| H  | 3.76997600  | 0.86019300  | 3.57871300  |
| H  | 4.59264100  | 0.65860200  | 2.03491500  |
| H  | 3.51254600  | 2.03673500  | 2.29823400  |
| C  | 3.45345400  | -1.05066400 | -0.75387500 |
| C  | 3.02308000  | -2.52282400 | -0.54425700 |
| C  | 3.41165400  | -0.80611300 | -2.27816100 |
| C  | 4.90155500  | -0.86314200 | -0.25296000 |
| H  | 3.01176300  | -2.83681400 | 0.49746500  |
| H  | 2.03564700  | -2.71795400 | -0.97274300 |
| H  | 3.74244400  | -3.16074300 | -1.06981200 |
| H  | 3.82544900  | 0.15950100  | -2.57108600 |
| H  | 4.02390800  | -1.57652000 | -2.75916800 |
| H  | 2.39853400  | -0.89799700 | -2.68019500 |
| H  | 5.55843700  | -1.50425700 | -0.85126700 |
| H  | 5.26046500  | 0.16176500  | -0.36429000 |
| H  | 5.02833400  | -1.16202400 | 0.78932400  |
| C  | 2.28128600  | 1.91514100  | -0.59286200 |

|                                              |                |            |                             |
|----------------------------------------------|----------------|------------|-----------------------------|
| C                                            | 1.58426100     | 1.94572100 | -1.97473100                 |
| C                                            | 1.48471800     | 2.88179700 | 0.31104700                  |
| C                                            | 3.72566800     | 2.44113100 | -0.73391700                 |
| H                                            | 2.06163400     | 1.31704700 | -2.72358500                 |
| H                                            | 0.53271300     | 1.65305500 | -1.90154900                 |
| H                                            | 1.61698100     | 2.97649300 | -2.34571100                 |
| H                                            | 1.95646200     | 3.05150100 | 1.27963100                  |
| H                                            | 1.43744000     | 3.85174300 | -0.19611200                 |
| H                                            | 0.45566200     | 2.54601700 | 0.46861800                  |
| H                                            | 3.68169500     | 3.47537200 | -1.09332100                 |
| H                                            | 4.26805700     | 2.45026100 | 0.21338100                  |
| H                                            | 4.31142100     | 1.87601000 | -1.46078100                 |
| Zero-point correction=                       |                |            | 0.527844 (Hartree/Particle) |
| Thermal correction to Energy=                |                |            | 0.561977                    |
| Thermal correction to Enthalpy=              |                |            | 0.562922                    |
| Thermal correction to Gibbs Free Energy=     |                |            | 0.459556                    |
| Sum of electronic and zero-point Energies=   |                |            | -1557.351724                |
| Sum of electronic and thermal Energies=      |                |            | -1557.317591                |
| Sum of electronic and thermal Enthalpies=    |                |            | -1557.316646                |
| Sum of electronic and thermal Free Energies= |                |            | -1557.420012                |
| E(RB3LYP) =                                  | -1558.40702209 | A.U.       |                             |

11

|   |             |             |             |
|---|-------------|-------------|-------------|
| C | -3.73710100 | -0.22891100 | 0.23461300  |
| C | -3.09032700 | -1.44064400 | -0.20139700 |
| O | -1.95482300 | -1.49929000 | -0.72211200 |
| O | -3.82565000 | -2.53596100 | -0.03299400 |
| C | -3.24478700 | -3.80528800 | -0.41525500 |
| H | -2.33564900 | -3.99420700 | 0.15868400  |
| H | -4.00850500 | -4.54418700 | -0.18059700 |
| H | -3.01909400 | -3.80855300 | -1.48284600 |
| N | -4.89739900 | -0.39262100 | 0.86324700  |
| N | -5.87810600 | -0.50379000 | 1.41667800  |
| C | -3.28544300 | 1.16059800  | -0.02382100 |
| C | -2.82804100 | 1.52632500  | -1.30150900 |
| C | -3.37525400 | 2.13716700  | 0.98097600  |
| C | -2.46536600 | 2.84781800  | -1.56121000 |
| H | -2.77838900 | 0.78382400  | -2.09113400 |
| C | -3.02523100 | 3.45933000  | 0.70947800  |
| H | -3.72760100 | 1.86529000  | 1.97226100  |
| C | -2.56887400 | 3.81768200  | -0.56085700 |
| H | -2.12490500 | 3.12366500  | -2.55460500 |
| H | -3.11095100 | 4.20829800  | 1.49059600  |
| H | -2.30440000 | 4.84893900  | -0.77312500 |



|                                 |             |             |                             |
|---------------------------------|-------------|-------------|-----------------------------|
| P                               | 2.16315500  | 0.06708500  | 0.14332500                  |
| Au                              | -0.01798700 | -0.58781000 | -0.28781100                 |
| C                               | 2.81347100  | -1.05010900 | 1.58657100                  |
| C                               | 1.72032300  | -1.18338400 | 2.67408700                  |
| C                               | 3.07264100  | -2.47851000 | 1.06023300                  |
| C                               | 4.10885800  | -0.50775900 | 2.22798200                  |
| H                               | 1.44847100  | -0.24083000 | 3.14478700                  |
| H                               | 0.81111200  | -1.64361500 | 2.27614200                  |
| H                               | 2.10718000  | -1.84219200 | 3.45945500                  |
| H                               | 3.92523600  | -2.53863200 | 0.38337900                  |
| H                               | 3.29898500  | -3.11807500 | 1.92009400                  |
| H                               | 2.19364200  | -2.89961800 | 0.56343300                  |
| H                               | 4.45011800  | -1.23079500 | 2.97718300                  |
| H                               | 4.91952100  | -0.38069200 | 1.50808300                  |
| H                               | 3.95689900  | 0.44033600  | 2.74730800                  |
| C                               | 3.17626200  | -0.22404800 | -1.48112500                 |
| C                               | 2.75275200  | -1.56910800 | -2.11864300                 |
| C                               | 2.83000900  | 0.87161000  | -2.51333400                 |
| C                               | 4.70174900  | -0.22587700 | -1.24430700                 |
| H                               | 2.95521800  | -2.43651200 | -1.49357400                 |
| H                               | 1.69057700  | -1.57479100 | -2.38065200                 |
| H                               | 3.32158900  | -1.69540300 | -3.04655400                 |
| H                               | 3.21669900  | 1.85466900  | -2.24161000                 |
| H                               | 3.29661700  | 0.59566200  | -3.46505800                 |
| H                               | 1.75286100  | 0.94751300  | -2.68887100                 |
| H                               | 5.19959300  | -0.32365100 | -2.21535400                 |
| H                               | 5.06193400  | 0.69805100  | -0.78796300                 |
| H                               | 5.03179200  | -1.06592900 | -0.63067000                 |
| C                               | 2.16075500  | 1.93219500  | 0.64808100                  |
| C                               | 1.20658600  | 2.71285900  | -0.28502800                 |
| C                               | 1.58942900  | 2.08045200  | 2.07486000                  |
| C                               | 3.56480800  | 2.57208300  | 0.59822100                  |
| H                               | 1.52193000  | 2.71953700  | -1.32660800                 |
| H                               | 0.18542000  | 2.32683400  | -0.23712400                 |
| H                               | 1.18216100  | 3.75435400  | 0.05499800                  |
| H                               | 2.24655100  | 1.67615600  | 2.84549100                  |
| H                               | 1.47392200  | 3.15003000  | 2.28034000                  |
| H                               | 0.60108500  | 1.62152900  | 2.17070600                  |
| H                               | 3.48644300  | 3.60118100  | 0.96607100                  |
| H                               | 4.29049400  | 2.05680300  | 1.22966100                  |
| H                               | 3.96611600  | 2.62573000  | -0.41543600                 |
| Zero-point correction=          |             |             | 0.531757 (Hartree/Particle) |
| Thermal correction to Energy=   |             |             | 0.565308                    |
| Thermal correction to Enthalpy= |             |             | 0.566252                    |

|                                              |                          |
|----------------------------------------------|--------------------------|
| Thermal correction to Gibbs Free Energy=     | 0.465177                 |
| Sum of electronic and zero-point Energies=   | -1557.392604             |
| Sum of electronic and thermal Energies=      | -1557.359053             |
| Sum of electronic and thermal Enthalpies=    | -1557.358109             |
| Sum of electronic and thermal Free Energies= | -1557.459184             |
| E(RB3LYP) =                                  | -1558.45250544      A.U. |

2

|    |             |             |             |
|----|-------------|-------------|-------------|
| C  | -2.33772500 | 0.34707800  | 0.09390900  |
| C  | -2.74937400 | 1.75800700  | 0.31637300  |
| O  | -2.88432100 | 2.15761500  | 1.45611900  |
| O  | -2.88237300 | 2.47265600  | -0.79777400 |
| C  | -3.19132100 | 3.88142200  | -0.61870500 |
| H  | -2.40723000 | 4.36428400  | -0.03275300 |
| H  | -3.23567300 | 4.29284200  | -1.62492700 |
| H  | -4.15010700 | 3.99520100  | -0.10989600 |
| C  | -3.34528800 | -0.64256200 | 0.03393600  |
| C  | -4.73441800 | -0.30442800 | 0.07153100  |
| C  | -2.98808400 | -2.01980000 | -0.08740800 |
| C  | -5.70123600 | -1.28880800 | -0.01560200 |
| H  | -5.02998400 | 0.73389400  | 0.17742100  |
| C  | -3.96132000 | -2.99876500 | -0.17712500 |
| H  | -1.93502700 | -2.28020500 | -0.10810300 |
| C  | -5.31521700 | -2.63276700 | -0.14137300 |
| H  | -6.75359100 | -1.02755000 | 0.01409800  |
| H  | -3.68384500 | -4.04313200 | -0.27155600 |
| H  | -6.07865300 | -3.40241300 | -0.20998500 |
| P  | 2.10073500  | -0.14748100 | -0.01631000 |
| Au | -0.30251700 | 0.08576400  | 0.04476600  |
| C  | 2.84819500  | 1.57991700  | -0.47023400 |
| C  | 1.99788600  | 2.22050300  | -1.59456700 |
| C  | 2.73529400  | 2.52840800  | 0.74432200  |
| C  | 4.32345100  | 1.51693900  | -0.91854300 |
| H  | 2.01916900  | 1.66880300  | -2.53253200 |
| H  | 0.95304500  | 2.34132700  | -1.29228900 |
| H  | 2.39998700  | 3.21987800  | -1.79605900 |
| H  | 3.39924400  | 2.25647700  | 1.56574600  |
| H  | 3.02717700  | 3.53209800  | 0.41634500  |
| H  | 1.71126800  | 2.59508000  | 1.12393600  |
| H  | 4.67991900  | 2.53992000  | -1.08441600 |
| H  | 4.97499300  | 1.06449700  | -0.16858800 |
| H  | 4.45496200  | 0.97773200  | -1.85854900 |
| C  | 2.68696700  | -0.71530700 | 1.74042700  |
| C  | 1.89872400  | 0.07660700  | 2.81196500  |

|                                              |                |             |                             |
|----------------------------------------------|----------------|-------------|-----------------------------|
| C                                            | 2.32324100     | -2.20108800 | 1.95093400                  |
| C                                            | 4.20079200     | -0.53363600 | 1.97496700                  |
| H                                            | 2.08923500     | 1.14776900  | 2.79577500                  |
| H                                            | 0.81949100     | -0.07972200 | 2.71835800                  |
| H                                            | 2.19992400     | -0.29317200 | 3.79861900                  |
| H                                            | 2.91703600     | -2.87986100 | 1.33741200                  |
| H                                            | 2.52608600     | -2.45420200 | 2.99730800                  |
| H                                            | 1.26129700     | -2.39416200 | 1.77079900                  |
| H                                            | 4.44654700     | -0.92271600 | 2.96958000                  |
| H                                            | 4.81017400     | -1.08143000 | 1.25325500                  |
| H                                            | 4.50597400     | 0.51402400  | 1.95780900                  |
| C                                            | 2.54686400     | -1.46701600 | -1.35945400                 |
| C                                            | 1.56536900     | -2.65868300 | -1.24535200                 |
| C                                            | 2.32519200     | -0.86651100 | -2.76502400                 |
| C                                            | 3.99509300     | -1.98780800 | -1.25721400                 |
| H                                            | 1.62897900     | -3.19345400 | -0.29952600                 |
| H                                            | 0.52966000     | -2.33760400 | -1.39386300                 |
| H                                            | 1.80480400     | -3.37322100 | -2.04107100                 |
| H                                            | 3.05522700     | -0.09869500 | -3.02305800                 |
| H                                            | 2.43425000     | -1.67215000 | -3.49933300                 |
| H                                            | 1.31863100     | -0.45322300 | -2.88172200                 |
| H                                            | 4.17800000     | -2.67528500 | -2.09086100                 |
| H                                            | 4.73718100     | -1.19030200 | -1.32557800                 |
| H                                            | 4.17470200     | -2.54685100 | -0.33701800                 |
| Zero-point correction=                       |                |             | 0.521047 (Hartree/Particle) |
| Thermal correction to Energy=                |                |             | 0.552915                    |
| Thermal correction to Enthalpy=              |                |             | 0.553859                    |
| Thermal correction to Gibbs Free Energy=     |                |             | 0.456271                    |
| Sum of electronic and zero-point Energies=   |                |             | -1447.893282                |
| Sum of electronic and thermal Energies=      |                |             | -1447.861414                |
| Sum of electronic and thermal Enthalpies=    |                |             | -1447.860470                |
| Sum of electronic and thermal Free Energies= |                |             | -1447.958058                |
| E(RB3LYP) =                                  | -1448.91237568 | A.U.        |                             |

A-1a

|   |            |             |            |
|---|------------|-------------|------------|
| C | 1.53504500 | 0.01703700  | 0.40242100 |
| C | 1.59590200 | 1.16125000  | 1.39130700 |
| O | 1.41833000 | 1.02921500  | 2.58364800 |
| O | 1.81051200 | 2.36649300  | 0.80643600 |
| C | 1.77694500 | 3.50137500  | 1.69775800 |
| H | 2.52590900 | 3.39128300  | 2.48425900 |
| H | 1.99358200 | 4.36789100  | 1.07422200 |
| H | 0.78963200 | 3.59517300  | 2.15488300 |
| C | 2.07597300 | -1.28843600 | 0.93410800 |

|    |             |             |             |
|----|-------------|-------------|-------------|
| C  | 3.14041100  | -1.31940200 | 1.85450700  |
| C  | 1.53826400  | -2.51741300 | 0.51011700  |
| C  | 3.63885200  | -2.53032900 | 2.33282900  |
| H  | 3.56392900  | -0.39215700 | 2.22252400  |
| C  | 2.04647000  | -3.73064300 | 0.97683800  |
| H  | 0.69758400  | -2.51701500 | -0.17744500 |
| C  | 3.09932100  | -3.74059100 | 1.89230900  |
| H  | 4.44958300  | -2.52686100 | 3.05509200  |
| H  | 1.60846700  | -4.66481900 | 0.63798400  |
| H  | 3.48861100  | -4.68188000 | 2.26798200  |
| P  | -3.00102900 | 0.12457800  | -0.01226100 |
| Au | -0.61443600 | 0.00616500  | 0.02358700  |
| C  | -3.74070100 | -1.66389500 | -0.06313000 |
| C  | -2.94679500 | -2.50706900 | -1.08938900 |
| C  | -3.53372000 | -2.35184300 | 1.30475900  |
| C  | -5.24036000 | -1.70474000 | -0.42142500 |
| H  | -3.05402300 | -2.16116600 | -2.11604900 |
| H  | -1.88079000 | -2.53127300 | -0.84615500 |
| H  | -3.32259200 | -3.53596200 | -1.05018600 |
| H  | -4.15085400 | -1.92680400 | 2.09704100  |
| H  | -3.82472100 | -3.40308400 | 1.20165300  |
| H  | -2.48718300 | -2.33260300 | 1.62302500  |
| H  | -5.58519400 | -2.74342000 | -0.36166800 |
| H  | -5.85398400 | -1.11864200 | 0.26488700  |
| H  | -5.43846800 | -1.36131300 | -1.43867900 |
| C  | -3.51798300 | 1.02567200  | 1.62509700  |
| C  | -2.66238900 | 0.48261100  | 2.79609800  |
| C  | -3.18308800 | 2.52920700  | 1.51377100  |
| C  | -5.01401100 | 0.87392000  | 1.97166500  |
| H  | -2.80494900 | -0.57892400 | 2.98845100  |
| H  | -1.59453000 | 0.66012000  | 2.63992900  |
| H  | -2.95603800 | 1.01986300  | 3.70527400  |
| H  | -3.82958600 | 3.06461100  | 0.81695300  |
| H  | -3.33025200 | 2.98258200  | 2.50031000  |
| H  | -2.13950100 | 2.69625700  | 1.23078600  |
| H  | -5.22576200 | 1.47506000  | 2.86325100  |
| H  | -5.67298000 | 1.22855800  | 1.17677800  |
| H  | -5.28730200 | -0.15546100 | 2.21077400  |
| C  | -3.56325300 | 1.14316300  | -1.56129200 |
| C  | -2.60753800 | 2.34734400  | -1.74299500 |
| C  | -3.40316000 | 0.27789800  | -2.83007300 |
| C  | -5.01720800 | 1.65335700  | -1.48552200 |
| H  | -2.65093100 | 3.06802000  | -0.92863300 |
| H  | -1.56868600 | 2.02278800  | -1.85495300 |

|                                              |                |             |                             |
|----------------------------------------------|----------------|-------------|-----------------------------|
| H                                            | -2.89344200    | 2.87483900  | -2.66040000                 |
| H                                            | -4.12621100    | -0.53677100 | -2.88752000                 |
| H                                            | -3.57226000    | 0.91844700  | -3.70283700                 |
| H                                            | -2.39399200    | -0.13542600 | -2.91636200                 |
| H                                            | -5.25540400    | 2.16559500  | -2.42490400                 |
| H                                            | -5.74329300    | 0.84751000  | -1.36296100                 |
| H                                            | -5.16774800    | 2.37631700  | -0.68186000                 |
| C                                            | 0.29831600     | -1.99445100 | -3.26943400                 |
| H                                            | 0.55177900     | -2.92407300 | -2.76706400                 |
| C                                            | 1.03772500     | -0.89216800 | -3.13195200                 |
| H                                            | 0.76850300     | 0.01702500  | -3.66603600                 |
| S                                            | 2.37164400     | 0.58937100  | -1.17909000                 |
| C                                            | 4.14795100     | 0.74456400  | -0.90064300                 |
| C                                            | 4.99451800     | -0.35880400 | -0.73297300                 |
| C                                            | 4.64702400     | 2.05268600  | -0.86241900                 |
| C                                            | 6.35772100     | -0.13879900 | -0.53340800                 |
| H                                            | 4.61061200     | -1.37163400 | -0.75326400                 |
| C                                            | 6.01156700     | 2.25520300  | -0.65713100                 |
| H                                            | 3.97789200     | 2.89571200  | -0.99594800                 |
| C                                            | 6.86489000     | 1.16211400  | -0.49367300                 |
| H                                            | 7.02230500     | -0.98753000 | -0.40704300                 |
| H                                            | 6.40649100     | 3.26577700  | -0.63246200                 |
| H                                            | 7.92708700     | 1.32320600  | -0.33866900                 |
| C                                            | 2.31077200     | -0.85210900 | -2.34311800                 |
| H                                            | 2.48494300     | -1.77160600 | -1.78085700                 |
| H                                            | 3.17081200     | -0.65904100 | -2.99276700                 |
| H                                            | -0.57293700    | -2.01072000 | -3.91609900                 |
| Zero-point correction=                       |                |             | 0.687237 (Hartree/Particle) |
| Thermal correction to Energy=                |                |             | 0.729429                    |
| Thermal correction to Enthalpy=              |                |             | 0.730373                    |
| Thermal correction to Gibbs Free Energy=     |                |             | 0.611492                    |
| Sum of electronic and zero-point Energies=   |                |             | -2194.898904                |
| Sum of electronic and thermal Energies=      |                |             | -2194.856712                |
| Sum of electronic and thermal Enthalpies=    |                |             | -2194.855768                |
| Sum of electronic and thermal Free Energies= |                |             | -2194.974649                |
| E(RB3LYP) =                                  | -2196.27022791 | A.U.        |                             |

#### A-TS<sub>a1</sub>

1 1

|   |             |             |            |
|---|-------------|-------------|------------|
| C | -1.88013400 | 0.62349500  | 0.88090200 |
| C | -1.39821500 | 0.59757400  | 2.25746900 |
| O | -0.71534100 | 1.46566600  | 2.79058200 |
| O | -1.76077800 | -0.53962200 | 2.94333800 |
| C | -1.20713100 | -0.67073100 | 4.26347300 |

|    |             |             |             |
|----|-------------|-------------|-------------|
| H  | -1.46965200 | 0.19041800  | 4.88125900  |
| H  | -1.63889600 | -1.58365800 | 4.67375900  |
| H  | -0.11790800 | -0.75378600 | 4.21848300  |
| C  | -2.13986600 | 1.95314600  | 0.24635400  |
| C  | -2.73513400 | 3.00387200  | 0.96853100  |
| C  | -1.81766700 | 2.18249100  | -1.10199400 |
| C  | -3.00061600 | 4.23302700  | 0.36345400  |
| H  | -2.96628000 | 2.86526500  | 2.02009300  |
| C  | -2.09290700 | 3.40599400  | -1.71382400 |
| H  | -1.34599800 | 1.38690200  | -1.67142400 |
| C  | -2.68679800 | 4.43695900  | -0.98222100 |
| H  | -3.45295800 | 5.03174700  | 0.94403600  |
| H  | -1.84112300 | 3.55412400  | -2.76021300 |
| H  | -2.89744200 | 5.39234800  | -1.45354400 |
| P  | 1.76248300  | -2.32262300 | -0.20212600 |
| Au | 0.70742700  | -0.22843800 | 0.21377400  |
| C  | 2.32538200  | -2.31493100 | -2.05918000 |
| C  | 1.19772500  | -1.69931800 | -2.92238400 |
| C  | 3.54491000  | -1.38264800 | -2.22644400 |
| C  | 2.68772400  | -3.70923300 | -2.61309800 |
| H  | 0.27302200  | -2.27368700 | -2.91079700 |
| H  | 0.97023400  | -0.67602300 | -2.60923600 |
| H  | 1.54622600  | -1.65919700 | -3.96082100 |
| H  | 4.45496300  | -1.78341000 | -1.77757900 |
| H  | 3.74040400  | -1.27139400 | -3.29887100 |
| H  | 3.35755900  | -0.38260500 | -1.82602500 |
| H  | 3.06511100  | -3.58803000 | -3.63500400 |
| H  | 3.47016900  | -4.20490700 | -2.03575100 |
| H  | 1.82745000  | -4.37886600 | -2.67058300 |
| C  | 3.30157600  | -2.49699900 | 0.96814600  |
| C  | 4.03526100  | -1.13964700 | 1.05319600  |
| C  | 2.82741000  | -2.81326900 | 2.40409100  |
| C  | 4.30363400  | -3.58382500 | 0.52361100  |
| H  | 4.44904800  | -0.80766300 | 0.10264800  |
| H  | 3.37015200  | -0.35933900 | 1.43158800  |
| H  | 4.86883500  | -1.24485100 | 1.75702800  |
| H  | 2.43397100  | -3.82472600 | 2.51268200  |
| H  | 3.69159000  | -2.73295100 | 3.07285800  |
| H  | 2.07543400  | -2.09975400 | 2.75454100  |
| H  | 5.09535100  | -3.65419400 | 1.27858000  |
| H  | 3.85104700  | -4.57284100 | 0.43781800  |
| H  | 4.78911000  | -3.34524400 | -0.42442800 |
| C  | 0.53524900  | -3.78657000 | 0.12417500  |
| C  | -0.23514500 | -3.51875700 | 1.43865700  |

|   |             |             |             |
|---|-------------|-------------|-------------|
| C | -0.51734100 | -3.80524900 | -1.00292900 |
| C | 1.20204900  | -5.17565700 | 0.20525600  |
| H | 0.39135600  | -3.58977800 | 2.32611100  |
| H | -0.71980000 | -2.53985300 | 1.44115700  |
| H | -1.01791700 | -4.28038800 | 1.53553400  |
| H | -0.11446800 | -4.13804800 | -1.96025400 |
| H | -1.30692000 | -4.51236500 | -0.72311600 |
| H | -0.97780600 | -2.82330000 | -1.13691600 |
| H | 0.41512100  | -5.93131700 | 0.31256500  |
| H | 1.77397700  | -5.42756200 | -0.68924300 |
| H | 1.85735700  | -5.27535200 | 1.07227200  |
| C | -6.91075200 | -0.94462500 | 0.90699700  |
| H | -7.13644900 | 0.01367000  | 0.44675500  |
| C | -5.74632600 | -1.17640000 | 1.51766000  |
| H | -5.55568500 | -2.14717400 | 1.97176800  |
| S | -3.13176200 | -0.65798300 | 0.62923100  |
| C | -3.78758000 | -0.53839400 | -1.04378100 |
| C | -3.66420700 | -1.69055400 | -1.82766500 |
| C | -4.47398400 | 0.58315100  | -1.52534800 |
| C | -4.20378700 | -1.71093800 | -3.11497600 |
| H | -3.16882700 | -2.56885400 | -1.42978400 |
| C | -5.01347800 | 0.54835900  | -2.81077600 |
| H | -4.58151300 | 1.47558900  | -0.92151500 |
| C | -4.87508800 | -0.59148100 | -3.60697400 |
| H | -4.10952000 | -2.60488100 | -3.72329800 |
| H | -5.54392500 | 1.41639800  | -3.18928100 |
| H | -5.30012200 | -0.60895900 | -4.60576600 |
| C | -4.65750300 | -0.16525700 | 1.64040300  |
| H | -4.95423500 | 0.83443800  | 1.31800100  |
| H | -4.24000500 | -0.11937300 | 2.64885800  |
| H | -7.68561900 | -1.70305300 | 0.86039200  |
| C | 3.81589200  | 4.40694700  | 2.44541400  |
| H | 4.67260900  | 3.76297500  | 2.26239600  |
| C | 2.56531000  | 3.94451800  | 2.40085000  |
| H | 1.72727300  | 4.61383400  | 2.58617600  |
| S | 1.22052600  | 2.36638000  | 0.54085300  |
| C | 2.39098500  | 2.84844600  | -0.73969000 |
| C | 1.92903900  | 3.74560200  | -1.71039500 |
| C | 3.70481600  | 2.36785200  | -0.80202500 |
| C | 2.77503800  | 4.14571400  | -2.74698100 |
| H | 0.91702000  | 4.13246700  | -1.64508500 |
| C | 4.54985700  | 2.78830800  | -1.82981200 |
| H | 4.07300300  | 1.67599600  | -0.05235500 |
| C | 4.08604900  | 3.67209900  | -2.80733700 |

|                                              |                |            |                             |
|----------------------------------------------|----------------|------------|-----------------------------|
| H                                            | 2.41191200     | 4.84216400 | -3.49683100                 |
| H                                            | 5.57224200     | 2.42352400 | -1.86706300                 |
| H                                            | 4.74642800     | 3.99473300 | -3.60632500                 |
| C                                            | 2.21214700     | 2.52133800 | 2.11072200                  |
| H                                            | 3.09673900     | 1.88365600 | 2.05168200                  |
| H                                            | 1.51577100     | 2.10860600 | 2.84522400                  |
| H                                            | 4.02899700     | 5.44531200 | 2.67870200                  |
| Zero-point correction=                       |                |            | 0.851055 (Hartree/Particle) |
| Thermal correction to Energy=                |                |            | 0.904301                    |
| Thermal correction to Enthalpy=              |                |            | 0.905245                    |
| Thermal correction to Gibbs Free Energy=     |                |            | 0.760073                    |
| Sum of electronic and zero-point Energies=   |                |            | -2941.860278                |
| Sum of electronic and thermal Energies=      |                |            | -2941.807031                |
| Sum of electronic and thermal Enthalpies=    |                |            | -2941.806087                |
| Sum of electronic and thermal Free Energies= |                |            | -2941.951259                |
| E(RB3LYP) =                                  | -2943.57739136 | A.U.       |                             |

A-2a

|   |             |             |             |
|---|-------------|-------------|-------------|
| C | 1.01063200  | -0.13563400 | 0.31791200  |
| C | 1.98848900  | -0.71517200 | 1.21364000  |
| O | 2.72603500  | -0.07315000 | 1.94882300  |
| O | 2.04565000  | -2.09253900 | 1.17178700  |
| C | 3.01495300  | -2.67207400 | 2.04613300  |
| H | 2.81012300  | -2.41768500 | 3.09008500  |
| H | 2.93788400  | -3.75090100 | 1.89905900  |
| H | 4.02411700  | -2.32857800 | 1.80174600  |
| C | 0.80786000  | 1.33411700  | 0.29034600  |
| C | 0.51242900  | 2.03519800  | 1.47454200  |
| C | 0.90197900  | 2.07713000  | -0.90049000 |
| C | 0.29949700  | 3.41173900  | 1.46291800  |
| H | 0.46453200  | 1.48475200  | 2.40762900  |
| C | 0.66652900  | 3.45357700  | -0.91817000 |
| H | 1.20382100  | 1.57409700  | -1.81320300 |
| C | 0.36084400  | 4.12707500  | 0.26432000  |
| H | 0.07709500  | 3.92822400  | 2.39270000  |
| H | 0.74680200  | 4.00208900  | -1.85302400 |
| H | 0.18697500  | 5.19929300  | 0.25565200  |
| C | 1.89581900  | -0.57085500 | -3.74689000 |
| H | 1.62376700  | 0.46382300  | -3.93834600 |
| C | 1.14237900  | -1.36886200 | -2.98926400 |
| H | 1.44960700  | -2.40010900 | -2.82258000 |
| S | -0.03549900 | -1.22527200 | -0.46798300 |
| C | -1.77710300 | -0.86477000 | -0.07049700 |
| C | -2.38654300 | 0.36725500  | -0.33298900 |



|                                              |                |             |                             |
|----------------------------------------------|----------------|-------------|-----------------------------|
| C                                            | -2.48229800    | -1.88558200 | 0.57479000                  |
| C                                            | -3.71360800    | 0.56562900  | 0.04923600                  |
| H                                            | -1.83525600    | 1.16786700  | -0.81249200                 |
| C                                            | -3.81025100    | -1.67716000 | 0.94938100                  |
| H                                            | -1.99386200    | -2.83258300 | 0.78325800                  |
| C                                            | -4.42585300    | -0.45277600 | 0.68641400                  |
| H                                            | -4.18959300    | 1.52115900  | -0.14929900                 |
| H                                            | -4.36031300    | -2.47026300 | 1.44676500                  |
| H                                            | -5.45846800    | -0.29016900 | 0.98020900                  |
| C                                            | -0.13009600    | -0.94713000 | -2.33394100                 |
| H                                            | -0.37926000    | 0.09704300  | -2.53038900                 |
| H                                            | -0.97570300    | -1.57998700 | -2.62608700                 |
| H                                            | 2.80829100     | -0.92844600 | -4.21319600                 |
| Zero-point correction=                       |                |             | 0.312898 (Hartree/Particle) |
| Thermal correction to Energy=                |                |             | 0.333694                    |
| Thermal correction to Enthalpy=              |                |             | 0.334638                    |
| Thermal correction to Gibbs Free Energy=     |                |             | 0.260195                    |
| Sum of electronic and zero-point Energies=   |                |             | -1245.014262                |
| Sum of electronic and thermal Energies=      |                |             | -1244.993466                |
| Sum of electronic and thermal Enthalpies=    |                |             | -1244.992522                |
| Sum of electronic and thermal Free Energies= |                |             | -1245.066965                |
| E(RB3LYP) =                                  | -1245.67925844 | A.U.        |                             |

#### A-TSc1

1 1

|   |             |             |             |
|---|-------------|-------------|-------------|
| C | -1.91971200 | 0.07651400  | -0.33901600 |
| C | -1.80033400 | -0.61062500 | -1.61086800 |
| O | -1.04905000 | -0.28279800 | -2.52542100 |
| O | -2.56817400 | -1.74385800 | -1.71078900 |
| C | -2.39483200 | -2.49407900 | -2.92978600 |
| H | -1.36853500 | -2.85767800 | -3.01588000 |
| H | -3.08965000 | -3.33086500 | -2.85790800 |
| H | -2.62496900 | -1.87604000 | -3.79958400 |
| C | -1.45270300 | 1.49857100  | -0.17138800 |
| C | -1.25032300 | 2.35571200  | -1.28836100 |
| C | -1.25845600 | 2.07110500  | 1.12011600  |
| C | -0.89000200 | 3.68885200  | -1.11296900 |
| H | -1.37691200 | 1.95587100  | -2.28526300 |
| C | -0.91330900 | 3.41506000  | 1.27722300  |
| H | -1.42083800 | 1.46558900  | 2.00595900  |
| C | -0.72876400 | 4.23404200  | 0.16462200  |
| H | -0.75248900 | 4.31429400  | -1.99021500 |
| H | -0.79357800 | 3.81578300  | 2.27943500  |
| H | -0.46604100 | 5.27979100  | 0.28794400  |

|    |             |             |             |
|----|-------------|-------------|-------------|
| P  | 2.97557000  | -0.21479300 | 0.04681900  |
| Au | 0.71862600  | 0.34547500  | 0.06280300  |
| C  | 3.29797400  | -1.59069600 | 1.37256200  |
| C  | 2.51282500  | -1.24922700 | 2.66120200  |
| C  | 2.73858100  | -2.93834300 | 0.86950900  |
| C  | 4.79298900  | -1.76712700 | 1.71317000  |
| H  | 2.83273300  | -0.32421900 | 3.13684900  |
| H  | 1.43820400  | -1.18272100 | 2.46856000  |
| H  | 2.67581800  | -2.05914400 | 3.38182600  |
| H  | 3.30287000  | -3.35400200 | 0.03408600  |
| H  | 2.80518400  | -3.65950600 | 1.69183500  |
| H  | 1.68615600  | -2.86094300 | 0.58191100  |
| H  | 4.89210100  | -2.60467300 | 2.41295300  |
| H  | 5.40283800  | -2.00191500 | 0.83879800  |
| H  | 5.21738100  | -0.88985200 | 2.20401500  |
| C  | 3.38289000  | -0.84915100 | -1.73741900 |
| C  | 2.25223300  | -1.78864600 | -2.22256700 |
| C  | 3.39929000  | 0.34402600  | -2.71781400 |
| C  | 4.73585200  | -1.58812400 | -1.81990000 |
| H  | 2.13456200  | -2.68057400 | -1.60932100 |
| H  | 1.28933900  | -1.27343900 | -2.28445400 |
| H  | 2.51085500  | -2.12271900 | -3.23412800 |
| H  | 4.24900000  | 1.01093300  | -2.56738200 |
| H  | 3.48209300  | -0.05817000 | -3.73330300 |
| H  | 2.47339600  | 0.92430100  | -2.67394600 |
| H  | 4.92649700  | -1.83948100 | -2.86928700 |
| H  | 5.57506900  | -0.98138800 | -1.47520800 |
| H  | 4.73887400  | -2.52745600 | -1.26298700 |
| C  | 3.97689300  | 1.39338200  | 0.46231000  |
| C  | 3.34504600  | 2.59646600  | -0.27801100 |
| C  | 3.85604900  | 1.70576600  | 1.96976100  |
| C  | 5.47089200  | 1.28873500  | 0.08862900  |
| H  | 3.37926500  | 2.51219400  | -1.36229800 |
| H  | 2.30498000  | 2.75485500  | 0.02117700  |
| H  | 3.91045800  | 3.49395500  | -0.00193800 |
| H  | 4.39196300  | 0.99575600  | 2.60081200  |
| H  | 4.30189500  | 2.69074400  | 2.14616600  |
| H  | 2.81329800  | 1.75736500  | 2.29613600  |
| H  | 5.97278700  | 2.20616800  | 0.41597500  |
| H  | 5.97400300  | 0.45215300  | 0.57708500  |
| H  | 5.62903800  | 1.20554800  | -0.98792600 |
| C  | -1.26028000 | -3.21411300 | 2.64690900  |
| H  | -1.94828100 | -3.23037200 | 3.48849900  |
| C  | -1.62369500 | -2.76234500 | 1.44456100  |

|                                              |                |             |                             |
|----------------------------------------------|----------------|-------------|-----------------------------|
| H                                            | -0.91914100    | -2.76398900 | 0.61723500                  |
| S                                            | -3.04750000    | -0.42115800 | 0.91037700                  |
| C                                            | -4.78910900    | -0.13895200 | 0.47081700                  |
| C                                            | -5.36431700    | -0.55429700 | -0.73543200                 |
| C                                            | -5.53522100    | 0.55195100  | 1.43265400                  |
| C                                            | -6.71111900    | -0.27708300 | -0.96677200                 |
| H                                            | -4.77002300    | -1.07782700 | -1.47357500                 |
| C                                            | -6.88344800    | 0.81810700  | 1.18722500                  |
| H                                            | -5.07085300    | 0.87855100  | 2.35816400                  |
| C                                            | -7.46917800    | 0.40415200  | -0.00962800                 |
| H                                            | -7.17001700    | -0.59446100 | -1.89800200                 |
| H                                            | -7.46971500    | 1.35183900  | 1.92842000                  |
| H                                            | -8.51688700    | 0.61475700  | -0.20023900                 |
| C                                            | -3.00007500    | -2.27128400 | 1.13471900                  |
| H                                            | -3.40337300    | -2.70411700 | 0.22046800                  |
| H                                            | -3.69252100    | -2.42895400 | 1.96554400                  |
| H                                            | -0.26390200    | -3.60495900 | 2.82656200                  |
| Zero-point correction=                       |                |             | 0.686677 (Hartree/Particle) |
| Thermal correction to Energy=                |                |             | 0.728273                    |
| Thermal correction to Enthalpy=              |                |             | 0.729217                    |
| Thermal correction to Gibbs Free Energy=     |                |             | 0.610770                    |
| Sum of electronic and zero-point Energies=   |                |             | -2194.868391                |
| Sum of electronic and thermal Energies=      |                |             | -2194.826795                |
| Sum of electronic and thermal Enthalpies=    |                |             | -2194.825851                |
| Sum of electronic and thermal Free Energies= |                |             | -2194.944298                |
| E(RB3LYP) =                                  | -2196.23459110 | A.U.        |                             |

A-1c

|   |             |             |             |
|---|-------------|-------------|-------------|
| C | -2.48680000 | 0.05322000  | 0.22222600  |
| C | -1.98201100 | -1.02793500 | -0.51036900 |
| O | -0.82644200 | -1.12237900 | -1.02927700 |
| O | -2.81771400 | -2.09164000 | -0.68037300 |
| C | -2.27541900 | -3.25187200 | -1.34028600 |
| H | -1.41598800 | -3.64527700 | -0.79295600 |
| H | -3.08557600 | -3.98102800 | -1.34580700 |
| H | -1.97305200 | -3.01250900 | -2.36155100 |
| C | -1.76928000 | 1.35032200  | 0.35359500  |
| C | -1.30202200 | 2.02550000  | -0.79039700 |
| C | -1.58437700 | 1.96369500  | 1.60646600  |
| C | -0.67332200 | 3.26646300  | -0.68210100 |
| H | -1.45440900 | 1.57927100  | -1.76818900 |
| C | -0.97083900 | 3.21176900  | 1.71219000  |
| H | -1.93433900 | 1.45959000  | 2.50314400  |
| C | -0.51166000 | 3.86882400  | 0.56826100  |

|    |             |             |             |
|----|-------------|-------------|-------------|
| H  | -0.33564100 | 3.77634700  | -1.57992600 |
| H  | -0.85238900 | 3.67128400  | 2.68923500  |
| H  | -0.04433300 | 4.84571600  | 0.64906200  |
| P  | 3.36688500  | -0.01606300 | -0.01335600 |
| Au | 1.13819700  | -0.46550900 | -0.45940600 |
| C  | 3.57236500  | 0.20498900  | 1.89682000  |
| C  | 2.40058800  | 1.06041700  | 2.43398500  |
| C  | 3.45889100  | -1.16810500 | 2.59496500  |
| C  | 4.91241200  | 0.85786600  | 2.29736700  |
| H  | 2.37581000  | 2.07236400  | 2.03519500  |
| H  | 1.43313100  | 0.59450800  | 2.22739400  |
| H  | 2.51009800  | 1.13798500  | 3.52189100  |
| H  | 4.30956000  | -1.82275300 | 2.39983500  |
| H  | 3.42984800  | -0.99471800 | 3.67633900  |
| H  | 2.53707500  | -1.69084400 | 2.32337000  |
| H  | 4.96700300  | 0.89091400  | 3.39140400  |
| H  | 5.77936800  | 0.29481200  | 1.94693800  |
| H  | 5.00396600  | 1.88614700  | 1.94286700  |
| C  | 4.39466600  | -1.52697200 | -0.65160500 |
| C  | 3.67682100  | -2.84221600 | -0.26355700 |
| C  | 4.43980600  | -1.50730900 | -2.19541000 |
| C  | 5.83849300  | -1.55505000 | -0.10633200 |
| H  | 3.58269700  | -2.99341500 | 0.80998600  |
| H  | 2.67875200  | -2.89871000 | -0.70723800 |
| H  | 4.26515600  | -3.67692700 | -0.66129800 |
| H  | 5.04405700  | -0.69393800 | -2.59856000 |
| H  | 4.89802800  | -2.44399900 | -2.53129300 |
| H  | 3.43875800  | -1.45793300 | -2.63373800 |
| H  | 6.36791700  | -2.39355300 | -0.57269800 |
| H  | 6.39921700  | -0.64809800 | -0.33903900 |
| H  | 5.87652400  | -1.71524600 | 0.97288500  |
| C  | 3.86246200  | 1.59959700  | -0.95891200 |
| C  | 3.22076600  | 1.57804000  | -2.36716500 |
| C  | 3.26979100  | 2.82846800  | -0.23597700 |
| C  | 5.38859200  | 1.78652000  | -1.09130600 |
| H  | 3.57942400  | 0.77108900  | -3.00339300 |
| H  | 2.13103500  | 1.50939800  | -2.30793300 |
| H  | 3.46885100  | 2.52156500  | -2.86656000 |
| H  | 3.74497500  | 3.03264600  | 0.72452100  |
| H  | 3.44454900  | 3.70465700  | -0.87040800 |
| H  | 2.18993400  | 2.74228800  | -0.08981200 |
| H  | 5.57686500  | 2.75366900  | -1.57094000 |
| H  | 5.90037900  | 1.79945500  | -0.12688100 |
| H  | 5.85445000  | 1.02438200  | -1.71829500 |

|                                              |                |             |                             |
|----------------------------------------------|----------------|-------------|-----------------------------|
| C                                            | -3.53754400    | -1.96377900 | 4.01030400                  |
| H                                            | -4.44881200    | -1.59861600 | 4.47752200                  |
| C                                            | -3.39463000    | -2.01490900 | 2.68435900                  |
| H                                            | -2.47362900    | -2.39020300 | 2.24608100                  |
| S                                            | -4.06690700    | 0.07093500  | 0.96785200                  |
| C                                            | -5.41017600    | 0.26306700  | -0.23832800                 |
| C                                            | -5.44983500    | -0.41471800 | -1.46106600                 |
| C                                            | -6.41414300    | 1.16689800  | 0.12599800                  |
| C                                            | -6.52254500    | -0.18397700 | -2.32167100                 |
| H                                            | -4.65955200    | -1.10442800 | -1.72990000                 |
| C                                            | -7.48517500    | 1.38145100  | -0.74342000                 |
| H                                            | -6.35742600    | 1.70164100  | 1.06939300                  |
| C                                            | -7.53822400    | 0.70789600  | -1.96429400                 |
| H                                            | -6.56560800    | -0.70294900 | -3.27424100                 |
| H                                            | -8.26859300    | 2.08062700  | -0.46882600                 |
| H                                            | -8.36869900    | 0.88078100  | -2.64166000                 |
| C                                            | -4.45951300    | -1.59496200 | 1.72386700                  |
| H                                            | -4.58528900    | -2.29150900 | 0.89607200                  |
| H                                            | -5.41884700    | -1.41764700 | 2.21653000                  |
| H                                            | -2.75116300    | -2.30267100 | 4.67719700                  |
| Zero-point correction=                       |                |             | 0.687225 (Hartree/Particle) |
| Thermal correction to Energy=                |                |             | 0.729533                    |
| Thermal correction to Enthalpy=              |                |             | 0.730477                    |
| Thermal correction to Gibbs Free Energy=     |                |             | 0.608929                    |
| Sum of electronic and zero-point Energies=   |                |             | -2194.893666                |
| Sum of electronic and thermal Energies=      |                |             | -2194.851358                |
| Sum of electronic and thermal Enthalpies=    |                |             | -2194.850413                |
| Sum of electronic and thermal Free Energies= |                |             | -2194.971962                |
| E(RB3LYP) =                                  | -2196.24777510 |             | A.U.                        |

#### A-TSc2

|   |            |             |             |
|---|------------|-------------|-------------|
| C | 2.56839300 | 0.86581700  | -0.26920600 |
| C | 1.72245700 | 1.89532100  | -0.79624600 |
| O | 0.49706800 | 1.80757000  | -1.08211900 |
| O | 2.33214600 | 3.07979300  | -0.97752600 |
| C | 1.55258400 | 4.16546700  | -1.51711900 |
| H | 0.71413400 | 4.40384100  | -0.85914300 |
| H | 2.24241600 | 5.00609500  | -1.57667100 |
| H | 1.17628000 | 3.91016500  | -2.50961600 |
| C | 2.12594700 | -0.55464700 | -0.27433200 |
| C | 1.61289800 | -1.11814500 | -1.45907700 |
| C | 2.27050400 | -1.38887300 | 0.84612800  |
| C | 1.25738200 | -2.46622800 | -1.51657900 |
| H | 1.51353100 | -0.49800400 | -2.34474900 |

|    |             |             |             |
|----|-------------|-------------|-------------|
| C  | 1.91902800  | -2.73741400 | 0.78741200  |
| H  | 2.67213300  | -0.97950600 | 1.76550100  |
| C  | 1.41227800  | -3.28270800 | -0.39392500 |
| H  | 0.88020300  | -2.88203900 | -2.44650200 |
| H  | 2.05005900  | -3.36455700 | 1.66435700  |
| H  | 1.15331400  | -4.33616200 | -0.44327300 |
| P  | -3.19375300 | -0.35398800 | 0.19750200  |
| Au | -1.18340000 | 0.62124300  | -0.42398900 |
| C  | -4.56078600 | 1.00718200  | -0.00317700 |
| C  | -4.03391200 | 2.35279900  | 0.55013600  |
| C  | -4.83837400 | 1.23846100  | -1.50490300 |
| C  | -5.88397300 | 0.64909700  | 0.70607800  |
| H  | -3.83407400 | 2.33848300  | 1.61968700  |
| H  | -3.12329900 | 2.67095500  | 0.03435700  |
| H  | -4.80147200 | 3.11414200  | 0.37133400  |
| H  | -5.34264400 | 0.39876200  | -1.98406100 |
| H  | -5.50247800 | 2.10490700  | -1.59559200 |
| H  | -3.92512200 | 1.46926800  | -2.06137300 |
| H  | -6.61785300 | 1.43128300  | 0.48177400  |
| H  | -6.30737500 | -0.29839300 | 0.36771700  |
| H  | -5.78020800 | 0.61244700  | 1.79214300  |
| C  | -3.53058200 | -1.85017900 | -0.98149000 |
| C  | -3.12334000 | -1.46231800 | -2.42361600 |
| C  | -2.63102600 | -3.04185500 | -0.58662200 |
| C  | -5.00270300 | -2.31397600 | -0.97105300 |
| H  | -3.70138600 | -0.63920600 | -2.83904000 |
| H  | -2.06312900 | -1.20097800 | -2.48342900 |
| H  | -3.28821800 | -2.33408800 | -3.06698100 |
| H  | -2.91597400 | -3.49632800 | 0.36319000  |
| H  | -2.74302900 | -3.81383100 | -1.35610600 |
| H  | -1.57317200 | -2.76834300 | -0.55034700 |
| H  | -5.08882200 | -3.19768100 | -1.61322000 |
| H  | -5.35099500 | -2.60192500 | 0.02280800  |
| H  | -5.68461900 | -1.56211100 | -1.37139700 |
| C  | -3.05335000 | -0.93336300 | 2.03672500  |
| C  | -1.68162100 | -1.61620900 | 2.25006500  |
| C  | -3.07921800 | 0.29530600  | 2.97171600  |
| C  | -4.17927700 | -1.90296800 | 2.45530100  |
| H  | -1.54760100 | -2.52311300 | 1.66446500  |
| H  | -0.85335600 | -0.94165500 | 2.01684700  |
| H  | -1.60237500 | -1.89267700 | 3.30772300  |
| H  | -4.05752400 | 0.77471200  | 3.02061300  |
| H  | -2.83900200 | -0.04610700 | 3.98453300  |
| H  | -2.33171500 | 1.04341900  | 2.69199500  |

|                                              |                |             |                             |
|----------------------------------------------|----------------|-------------|-----------------------------|
| H                                            | -4.06570100    | -2.12330000 | 3.52271300                  |
| H                                            | -5.17635800    | -1.48159500 | 2.31568000                  |
| H                                            | -4.13100400    | -2.85605100 | 1.92584300                  |
| C                                            | 1.90464400     | 1.87999100  | 2.07426600                  |
| H                                            | 1.68874300     | 2.80430800  | 1.55091300                  |
| C                                            | 3.15970100     | 1.65478300  | 2.59798500                  |
| H                                            | 3.31651700     | 0.78614800  | 3.23472300                  |
| S                                            | 4.26743400     | 1.30219800  | -0.21037100                 |
| C                                            | 5.17154100     | -0.25106000 | -0.12438300                 |
| C                                            | 5.38941300     | -0.95166500 | -1.31804200                 |
| C                                            | 5.74860200     | -0.69296900 | 1.07051300                  |
| C                                            | 6.16762200     | -2.10841600 | -1.30497800                 |
| H                                            | 4.95860000     | -0.59236100 | -2.24660200                 |
| C                                            | 6.53466200     | -1.84661300 | 1.07058900                  |
| H                                            | 5.58934400     | -0.14624700 | 1.99224600                  |
| C                                            | 6.74155700     | -2.55612700 | -0.11302900                 |
| H                                            | 6.33394600     | -2.65260300 | -2.22945500                 |
| H                                            | 6.98460400     | -2.18818800 | 1.99769600                  |
| H                                            | 7.35469500     | -3.45196000 | -0.10878400                 |
| C                                            | 4.27589500     | 2.33858000  | 2.12116300                  |
| H                                            | 4.15532800     | 3.29017200  | 1.61401800                  |
| H                                            | 5.27351600     | 2.12850200  | 2.49206900                  |
| H                                            | 1.05167900     | 1.27653600  | 2.36529400                  |
| Zero-point correction=                       |                |             | 0.685839 (Hartree/Particle) |
| Thermal correction to Energy=                |                |             | 0.727533                    |
| Thermal correction to Enthalpy=              |                |             | 0.728478                    |
| Thermal correction to Gibbs Free Energy=     |                |             | 0.610054                    |
| Sum of electronic and zero-point Energies=   |                |             | -2194.873508                |
| Sum of electronic and thermal Energies=      |                |             | -2194.831814                |
| Sum of electronic and thermal Enthalpies=    |                |             | -2194.830870                |
| Sum of electronic and thermal Free Energies= |                |             | -2194.949294                |
| E(RB3LYP) =                                  | -2196.23701365 | A.U.        |                             |

A-TSd1

1 1

|   |             |             |             |
|---|-------------|-------------|-------------|
| C | -1.91971200 | 0.07651400  | -0.33901600 |
| C | -1.80033400 | -0.61062500 | -1.61086800 |
| O | -1.04905000 | -0.28279800 | -2.52542100 |
| O | -2.56817400 | -1.74385800 | -1.71078900 |
| C | -2.39483200 | -2.49407900 | -2.92978600 |
| H | -1.36853500 | -2.85767800 | -3.01588000 |
| H | -3.08965000 | -3.33086500 | -2.85790800 |
| H | -2.62496900 | -1.87604000 | -3.79958400 |
| C | -1.45270300 | 1.49857100  | -0.17138800 |

|    |             |             |             |
|----|-------------|-------------|-------------|
| C  | -1.25032300 | 2.35571200  | -1.28836100 |
| C  | -1.25845600 | 2.07110500  | 1.12011600  |
| C  | -0.89000200 | 3.68885200  | -1.11296900 |
| H  | -1.37691200 | 1.95587100  | -2.28526300 |
| C  | -0.91330900 | 3.41506000  | 1.27722300  |
| H  | -1.42083800 | 1.46558900  | 2.00595900  |
| C  | -0.72876400 | 4.23404200  | 0.16462200  |
| H  | -0.75248900 | 4.31429400  | -1.99021500 |
| H  | -0.79357800 | 3.81578300  | 2.27943500  |
| H  | -0.46604100 | 5.27979100  | 0.28794400  |
| P  | 2.97557000  | -0.21479300 | 0.04681900  |
| Au | 0.71862600  | 0.34547500  | 0.06280300  |
| C  | 3.29797400  | -1.59069600 | 1.37256200  |
| C  | 2.51282500  | -1.24922700 | 2.66120200  |
| C  | 2.73858100  | -2.93834300 | 0.86950900  |
| C  | 4.79298900  | -1.76712700 | 1.71317000  |
| H  | 2.83273300  | -0.32421900 | 3.13684900  |
| H  | 1.43820400  | -1.18272100 | 2.46856000  |
| H  | 2.67581800  | -2.05914400 | 3.38182600  |
| H  | 3.30287000  | -3.35400200 | 0.03408600  |
| H  | 2.80518400  | -3.65950600 | 1.69183500  |
| H  | 1.68615600  | -2.86094300 | 0.58191100  |
| H  | 4.89210100  | -2.60467300 | 2.41295300  |
| H  | 5.40283800  | -2.00191500 | 0.83879800  |
| H  | 5.21738100  | -0.88985200 | 2.20401500  |
| C  | 3.38289000  | -0.84915100 | -1.73741900 |
| C  | 2.25223300  | -1.78864600 | -2.22256700 |
| C  | 3.39929000  | 0.34402600  | -2.71781400 |
| C  | 4.73585200  | -1.58812400 | -1.81990000 |
| H  | 2.13456200  | -2.68057400 | -1.60932100 |
| H  | 1.28933900  | -1.27343900 | -2.28445400 |
| H  | 2.51085500  | -2.12271900 | -3.23412800 |
| H  | 4.24900000  | 1.01093300  | -2.56738200 |
| H  | 3.48209300  | -0.05817000 | -3.73330300 |
| H  | 2.47339600  | 0.92430100  | -2.67394600 |
| H  | 4.92649700  | -1.83948100 | -2.86928700 |
| H  | 5.57506900  | -0.98138800 | -1.47520800 |
| H  | 4.73887400  | -2.52745600 | -1.26298700 |
| C  | 3.97689300  | 1.39338200  | 0.46231000  |
| C  | 3.34504600  | 2.59646600  | -0.27801100 |
| C  | 3.85604900  | 1.70576600  | 1.96976100  |
| C  | 5.47089200  | 1.28873500  | 0.08862900  |
| H  | 3.37926500  | 2.51219400  | -1.36229800 |
| H  | 2.30498000  | 2.75485500  | 0.02117700  |



|                                              |                |             |                             |
|----------------------------------------------|----------------|-------------|-----------------------------|
| H                                            | 3.91045800     | 3.49395500  | -0.00193800                 |
| H                                            | 4.39196300     | 0.99575600  | 2.60081200                  |
| H                                            | 4.30189500     | 2.69074400  | 2.14616600                  |
| H                                            | 2.81329800     | 1.75736500  | 2.29613600                  |
| H                                            | 5.97278700     | 2.20616800  | 0.41597500                  |
| H                                            | 5.97400300     | 0.45215300  | 0.57708500                  |
| H                                            | 5.62903800     | 1.20554800  | -0.98792600                 |
| C                                            | -1.26028000    | -3.21411300 | 2.64690900                  |
| H                                            | -1.94828100    | -3.23037200 | 3.48849900                  |
| C                                            | -1.62369500    | -2.76234500 | 1.44456100                  |
| H                                            | -0.91914100    | -2.76398900 | 0.61723500                  |
| S                                            | -3.04750000    | -0.42115800 | 0.91037700                  |
| C                                            | -4.78910900    | -0.13895200 | 0.47081700                  |
| C                                            | -5.36431700    | -0.55429700 | -0.73543200                 |
| C                                            | -5.53522100    | 0.55195100  | 1.43265400                  |
| C                                            | -6.71111900    | -0.27708300 | -0.96677200                 |
| H                                            | -4.77002300    | -1.07782700 | -1.47357500                 |
| C                                            | -6.88344800    | 0.81810700  | 1.18722500                  |
| H                                            | -5.07085300    | 0.87855100  | 2.35816400                  |
| C                                            | -7.46917800    | 0.40415200  | -0.00962800                 |
| H                                            | -7.17001700    | -0.59446100 | -1.89800200                 |
| H                                            | -7.46971500    | 1.35183900  | 1.92842000                  |
| H                                            | -8.51688700    | 0.61475700  | -0.20023900                 |
| C                                            | -3.00007500    | -2.27128400 | 1.13471900                  |
| H                                            | -3.40337300    | -2.70411700 | 0.22046800                  |
| H                                            | -3.69252100    | -2.42895400 | 1.96554400                  |
| H                                            | -0.26390200    | -3.60495900 | 2.82656200                  |
| Zero-point correction=                       |                |             | 0.686851 (Hartree/Particle) |
| Thermal correction to Energy=                |                |             | 0.728381                    |
| Thermal correction to Enthalpy=              |                |             | 0.729325                    |
| Thermal correction to Gibbs Free Energy=     |                |             | 0.611564                    |
| Sum of electronic and zero-point Energies=   |                |             | -2194.872383                |
| Sum of electronic and thermal Energies=      |                |             | -2194.830853                |
| Sum of electronic and thermal Enthalpies=    |                |             | -2194.829909                |
| Sum of electronic and thermal Free Energies= |                |             | -2194.947670                |
| E(RB3LYP) =                                  | -2196.23459110 | A.U.        |                             |

#### A-1d

|   |             |            |             |
|---|-------------|------------|-------------|
| C | -2.46535900 | 0.67677300 | -0.50896200 |
| C | -1.72502700 | 1.59648600 | -1.35202500 |
| O | -0.65066000 | 1.34179700 | -1.90004600 |
| O | -2.30612200 | 2.82107500 | -1.47981400 |
| C | -1.62820100 | 3.74711700 | -2.34266800 |
| H | -1.53849600 | 3.34221600 | -3.35346400 |

|    |             |             |             |
|----|-------------|-------------|-------------|
| H  | -2.24583100 | 4.64505200  | -2.34657000 |
| H  | -0.62923400 | 3.97335100  | -1.96177000 |
| C  | -1.99137900 | -0.66641400 | -0.22174400 |
| C  | -1.08991900 | -1.34196300 | -1.12256600 |
| C  | -2.42896900 | -1.41746700 | 0.89476800  |
| C  | -0.73891900 | -2.70350400 | -0.90783200 |
| H  | -0.91575700 | -0.90192500 | -2.09880200 |
| C  | -2.04531600 | -2.73958300 | 1.09723900  |
| H  | -3.11146200 | -0.97339400 | 1.60714600  |
| C  | -1.19204600 | -3.40058400 | 0.20754700  |
| H  | -0.13466000 | -3.20330600 | -1.65959300 |
| H  | -2.42610700 | -3.26697300 | 1.96748400  |
| H  | -0.91285600 | -4.43608500 | 0.36836200  |
| P  | 3.19291600  | 0.02046800  | 0.18401500  |
| Au | 1.01772100  | -0.67524200 | -0.38346700 |
| C  | 3.29720400  | 0.20134100  | 2.10806200  |
| C  | 2.00163100  | 0.87513100  | 2.62077000  |
| C  | 3.33984600  | -1.19542100 | 2.76519700  |
| C  | 4.52072600  | 1.01372700  | 2.58201300  |
| H  | 1.85714400  | 1.88761900  | 2.24814000  |
| H  | 1.11707200  | 0.28626500  | 2.36017800  |
| H  | 2.05751300  | 0.93058000  | 3.71421400  |
| H  | 4.27790300  | -1.72432400 | 2.59169100  |
| H  | 3.24471600  | -1.06120100 | 3.84846600  |
| H  | 2.50930700  | -1.82853000 | 2.44007200  |
| H  | 4.53877300  | 1.00790200  | 3.67784800  |
| H  | 5.46670000  | 0.59014600  | 2.23988400  |
| H  | 4.47876300  | 2.05831000  | 2.26849900  |
| C  | 4.43417700  | -1.32597600 | -0.44950900 |
| C  | 3.87190800  | -2.73175900 | -0.12940100 |
| C  | 4.53964200  | -1.24644300 | -1.98852200 |
| C  | 5.84620800  | -1.19192600 | 0.15859300  |
| H  | 3.78042900  | -2.93685500 | 0.93550900  |
| H  | 2.89315900  | -2.88722600 | -0.59177800 |
| H  | 4.56042300  | -3.47480700 | -0.54757100 |
| H  | 5.05272200  | -0.35030600 | -2.33948200 |
| H  | 5.12505200  | -2.10658400 | -2.33160000 |
| H  | 3.55999900  | -1.30555800 | -2.47203900 |
| H  | 6.49351400  | -1.94785700 | -0.30017900 |
| H  | 6.30047900  | -0.21778700 | -0.03102800 |
| H  | 5.85713000  | -1.37357300 | 1.23473800  |
| C  | 3.50881500  | 1.71894500  | -0.69091000 |
| C  | 2.93734200  | 1.66524400  | -2.12905600 |
| C  | 2.71871900  | 2.82861500  | 0.03646000  |

|                                              |                |             |                             |
|----------------------------------------------|----------------|-------------|-----------------------------|
| C                                            | 5.00032400     | 2.11078300  | -0.73858400                 |
| H                                            | 3.40257500     | 0.90898200  | -2.75844900                 |
| H                                            | 1.85570800     | 1.50631600  | -2.12996600                 |
| H                                            | 3.12854600     | 2.63739500  | -2.59879700                 |
| H                                            | 3.11289900     | 3.06038000  | 1.02701700                  |
| H                                            | 2.79848900     | 3.74292100  | -0.56208400                 |
| H                                            | 1.65566000     | 2.58418400  | 0.11723300                  |
| H                                            | 5.08088000     | 3.11071300  | -1.17973300                 |
| H                                            | 5.46215600     | 2.15381000  | 0.24981800                  |
| H                                            | 5.59029900     | 1.43887700  | -1.36459000                 |
| C                                            | -1.63350000    | 2.47288200  | 2.90443400                  |
| H                                            | -1.46872800    | 1.50693900  | 3.37498600                  |
| C                                            | -2.72844200    | 2.72889900  | 2.18648300                  |
| H                                            | -2.86903300    | 3.70699800  | 1.73163400                  |
| S                                            | -3.94031800    | 1.32913300  | 0.12903100                  |
| C                                            | -5.19990500    | 0.02153900  | 0.05896500                  |
| C                                            | -6.06817400    | -0.24045000 | 1.12138300                  |
| C                                            | -5.34014200    | -0.64039600 | -1.16533100                 |
| C                                            | -7.07957500    | -1.19028400 | 0.95333900                  |
| H                                            | -5.97856100    | 0.27131900  | 2.07168900                  |
| C                                            | -6.35154600    | -1.58740600 | -1.31566400                 |
| H                                            | -4.66254000    | -0.42398500 | -1.98441900                 |
| C                                            | -7.22195800    | -1.86431300 | -0.25876400                 |
| H                                            | -7.75403400    | -1.39875300 | 1.77784000                  |
| H                                            | -6.45974700    | -2.10575800 | -2.26313800                 |
| H                                            | -8.00993000    | -2.60042300 | -0.38161200                 |
| C                                            | -3.81980400    | 1.73229100  | 1.97493400                  |
| H                                            | -3.66669100    | 0.81814300  | 2.55000100                  |
| H                                            | -4.80266200    | 2.15640800  | 2.20329600                  |
| H                                            | -0.87617200    | 3.23305200  | 3.06710000                  |
| Zero-point correction=                       |                |             | 0.686887 (Hartree/Particle) |
| Thermal correction to Energy=                |                |             | 0.729236                    |
| Thermal correction to Enthalpy=              |                |             | 0.730180                    |
| Thermal correction to Gibbs Free Energy=     |                |             | 0.608598                    |
| Sum of electronic and zero-point Energies=   |                |             | -2194.880567                |
| Sum of electronic and thermal Energies=      |                |             | -2194.838218                |
| Sum of electronic and thermal Enthalpies=    |                |             | -2194.837274                |
| Sum of electronic and thermal Free Energies= |                |             | -2194.958856                |
| E(RB3LYP) =                                  | -2196.24175070 | A.U         |                             |

#### A-TSd2

|   |             |            |             |
|---|-------------|------------|-------------|
| C | -2.53338500 | 0.89383500 | -0.31075900 |
| C | -1.69849900 | 1.86696600 | -1.01941900 |
| O | -0.53560000 | 1.68121000 | -1.38370800 |

|    |             |             |             |
|----|-------------|-------------|-------------|
| O  | -2.32545200 | 3.04800100  | -1.21727700 |
| C  | -1.57260000 | 4.06317600  | -1.90139400 |
| H  | -1.25854300 | 3.71210000  | -2.88683400 |
| H  | -2.25038600 | 4.91067300  | -1.99683900 |
| H  | -0.68833600 | 4.34476100  | -1.32400600 |
| C  | -2.06927900 | -0.49004100 | -0.13484700 |
| C  | -1.20432400 | -1.10549900 | -1.09773600 |
| C  | -2.49614700 | -1.29214500 | 0.94018000  |
| C  | -0.83738900 | -2.46861300 | -0.96894300 |
| H  | -1.01612700 | -0.59048100 | -2.03441100 |
| C  | -2.10985300 | -2.62829800 | 1.06225800  |
| H  | -3.16503500 | -0.87488600 | 1.68352500  |
| C  | -1.27433200 | -3.22815900 | 0.12068300  |
| H  | -0.25874600 | -2.93203900 | -1.76273900 |
| H  | -2.47538500 | -3.20718400 | 1.90534700  |
| H  | -0.99102700 | -4.27113200 | 0.21305300  |
| P  | 3.22076700  | -0.04598900 | 0.17111300  |
| Au | 0.99631200  | -0.61255600 | -0.33560000 |
| C  | 3.38375400  | 0.17680500  | 2.08660900  |
| C  | 2.13761100  | 0.92647600  | 2.61291000  |
| C  | 3.37718200  | -1.20279600 | 2.78082200  |
| C  | 4.65853700  | 0.94043400  | 2.50352500  |
| H  | 2.02051800  | 1.92645200  | 2.19887400  |
| H  | 1.22200200  | 0.36181300  | 2.41403800  |
| H  | 2.23476900  | 1.02995700  | 3.69965900  |
| H  | 4.28229000  | -1.78341300 | 2.59738200  |
| H  | 3.31966000  | -1.03460000 | 3.86192900  |
| H  | 2.50666800  | -1.80141100 | 2.49748300  |
| H  | 4.70813200  | 0.95959500  | 3.59805600  |
| H  | 5.57255500  | 0.46347800  | 2.14565200  |
| H  | 4.65727100  | 1.97813600  | 2.16552900  |
| C  | 4.36195500  | -1.48046000 | -0.45637400 |
| C  | 3.72792500  | -2.84166200 | -0.08383000 |
| C  | 4.43213200  | -1.44801000 | -1.99839900 |
| C  | 5.79485600  | -1.41120500 | 0.11285400  |
| H  | 3.64614000  | -3.01159500 | 0.98797500  |
| H  | 2.73333900  | -2.95245800 | -0.52473800 |
| H  | 4.36467200  | -3.63412900 | -0.49308700 |
| H  | 4.97823300  | -0.58746000 | -2.38599100 |
| H  | 4.96658600  | -2.34461000 | -2.33095600 |
| H  | 3.43812000  | -1.47283800 | -2.45484300 |
| H  | 6.38234700  | -2.22156600 | -0.33323800 |
| H  | 6.30230100  | -0.47492900 | -0.12555700 |
| H  | 5.82521100  | -1.55393300 | 1.19441200  |

|                                              |                |             |                             |
|----------------------------------------------|----------------|-------------|-----------------------------|
| C                                            | 3.60729100     | 1.60809200  | -0.76107600                 |
| C                                            | 3.00230100     | 1.54805600  | -2.18523000                 |
| C                                            | 2.89628400     | 2.78128500  | -0.05088300                 |
| C                                            | 5.11738700     | 1.91205900  | -0.85101100                 |
| H                                            | 3.41901500     | 0.75947300  | -2.80890200                 |
| H                                            | 1.91519800     | 1.43894300  | -2.15558600                 |
| H                                            | 3.22327000     | 2.50105200  | -2.68001600                 |
| H                                            | 3.31243300     | 3.01027600  | 0.93110300                  |
| H                                            | 3.03027300     | 3.67475300  | -0.67076600                 |
| H                                            | 1.82024000     | 2.60785200  | 0.03731000                  |
| H                                            | 5.24355500     | 2.89492900  | -1.31881600                 |
| H                                            | 5.60228600     | 1.95323400  | 0.12616200                  |
| H                                            | 5.65497900     | 1.19316900  | -1.47233300                 |
| C                                            | -1.65544900    | 1.95737300  | 1.90694200                  |
| H                                            | -1.66626000    | 0.92411000  | 2.23335800                  |
| C                                            | -2.75092700    | 2.77165600  | 2.08758600                  |
| H                                            | -2.67319000    | 3.82461800  | 1.82764400                  |
| S                                            | -4.19908300    | 1.36952900  | -0.09427500                 |
| C                                            | -5.19910800    | -0.12663100 | -0.11022200                 |
| C                                            | -6.11816500    | -0.33731100 | 0.92357700                  |
| C                                            | -5.16867400    | -0.98678300 | -1.21619000                 |
| C                                            | -6.99509200    | -1.42244600 | 0.85729200                  |
| H                                            | -6.15965600    | 0.33956900  | 1.77023700                  |
| C                                            | -6.03916300    | -2.07432500 | -1.26470400                 |
| H                                            | -4.47863800    | -0.80156700 | -2.03233700                 |
| C                                            | -6.95251800    | -2.29485600 | -0.23032800                 |
| H                                            | -7.70876900    | -1.58317700 | 1.65941700                  |
| H                                            | -6.01307600    | -2.74204700 | -2.12043700                 |
| H                                            | -7.63383200    | -3.13853400 | -0.27775500                 |
| C                                            | -4.01955000    | 2.23691400  | 2.30903400                  |
| H                                            | -4.12453200    | 1.23895600  | 2.72285700                  |
| H                                            | -4.89503100    | 2.87439600  | 2.37207000                  |
| H                                            | -0.68846300    | 2.36396300  | 1.63151400                  |
| Zero-point correction=                       |                |             | 0.685471 (Hartree/Particle) |
| Thermal correction to Energy=                |                |             | 0.727277                    |
| Thermal correction to Enthalpy=              |                |             | 0.728221                    |
| Thermal correction to Gibbs Free Energy=     |                |             | 0.610515                    |
| Sum of electronic and zero-point Energies=   |                |             | -2194.865358                |
| Sum of electronic and thermal Energies=      |                |             | -2194.823552                |
| Sum of electronic and thermal Enthalpies=    |                |             | -2194.822607                |
| Sum of electronic and thermal Free Energies= |                |             | -2194.940313                |
| E(RB3LYP) =                                  | -2196.22897407 | A.U.        |                             |

A-TSb11

|    |             |             |             |
|----|-------------|-------------|-------------|
| C  | 0.89175300  | 0.20892300  | -0.35697000 |
| C  | 1.23465600  | -0.81046700 | -1.40051900 |
| O  | 1.18322200  | -0.51609900 | -2.57977000 |
| O  | 1.43619300  | -2.06378600 | -0.95389600 |
| C  | 1.59931600  | -3.06045500 | -1.99225800 |
| H  | 2.47203000  | -2.82846500 | -2.60511800 |
| H  | 1.73790200  | -4.00401900 | -1.46641000 |
| H  | 0.71013500  | -3.09556700 | -2.62431300 |
| C  | 1.49178400  | 1.53989000  | -0.47254200 |
| C  | 2.60503000  | 1.79940800  | -1.30823700 |
| C  | 0.94526000  | 2.61939800  | 0.25995200  |
| C  | 3.12365500  | 3.08475100  | -1.41810800 |
| H  | 3.03895600  | 0.99401600  | -1.88702600 |
| C  | 1.47919000  | 3.89903000  | 0.16397700  |
| H  | 0.08965300  | 2.43792800  | 0.90431800  |
| C  | 2.56852600  | 4.13618900  | -0.68019400 |
| H  | 3.96099300  | 3.27147800  | -2.08341000 |
| H  | 1.04395800  | 4.71343900  | 0.73443500  |
| H  | 2.98033300  | 5.13717200  | -0.76675700 |
| P  | -3.57880700 | -0.11184200 | 0.21063000  |
| Au | -1.19420100 | 0.03784700  | 0.01531800  |
| C  | -4.05788800 | -1.97648700 | 0.41811200  |
| C  | -3.19435500 | -2.82812600 | -0.54351600 |
| C  | -3.69933900 | -2.44668400 | 1.84490400  |
| C  | -5.55084600 | -2.26466700 | 0.15821700  |
| H  | -3.36675300 | -2.61152900 | -1.59600700 |
| H  | -2.12650600 | -2.70498300 | -0.33902500 |
| H  | -3.44416500 | -3.88287200 | -0.38104900 |
| H  | -4.34839100 | -2.02294700 | 2.61242500  |
| H  | -3.82385800 | -3.53439000 | 1.88543400  |
| H  | -2.65800200 | -2.22820100 | 2.10044000  |
| H  | -5.74262600 | -3.32346800 | 0.36650100  |
| H  | -6.21273100 | -1.68225200 | 0.80182900  |
| H  | -5.83863500 | -2.08737300 | -0.87961700 |
| C  | -4.13280700 | 0.91575100  | 1.75718900  |
| C  | -3.15883500 | 0.63347200  | 2.92655000  |
| C  | -4.00078700 | 2.42247900  | 1.44456500  |
| C  | -5.57661700 | 0.62416300  | 2.21580300  |
| H  | -3.19173300 | -0.39302400 | 3.28682900  |
| H  | -2.12532600 | 0.86714600  | 2.65318100  |
| H  | -3.43493500 | 1.28243300  | 3.76541000  |
| H  | -4.73580300 | 2.77729700  | 0.72140700  |
| H  | -4.17004700 | 2.97841700  | 2.37334700  |
| H  | -2.99984800 | 2.68139200  | 1.08634500  |

|                                              |             |             |                             |
|----------------------------------------------|-------------|-------------|-----------------------------|
| H                                            | -5.81639400 | 1.28839300  | 3.05404000                  |
| H                                            | -6.31524200 | 0.80966600  | 1.43372700                  |
| H                                            | -5.70374300 | -0.39907900 | 2.57376300                  |
| C                                            | -4.34270500 | 0.61926800  | -1.41233500                 |
| C                                            | -3.56252900 | 1.89689100  | -1.80782000                 |
| C                                            | -4.14257800 | -0.37875700 | -2.57442700                 |
| C                                            | -5.84408000 | 0.95269700  | -1.29161600                 |
| H                                            | -3.64260000 | 2.70348600  | -1.08130600                 |
| H                                            | -2.50162100 | 1.68723100  | -1.97370700                 |
| H                                            | -3.97622800 | 2.26779400  | -2.75251400                 |
| H                                            | -4.74873200 | -1.28018900 | -2.47624700                 |
| H                                            | -4.45251700 | 0.11642900  | -3.50112200                 |
| H                                            | -3.09369400 | -0.66474200 | -2.69592300                 |
| H                                            | -6.20360800 | 1.29419300  | -2.26896500                 |
| H                                            | -6.44862600 | 0.08946700  | -1.00688600                 |
| H                                            | -6.03950300 | 1.75839500  | -0.58131800                 |
| C                                            | 1.50790000  | -0.58749800 | 1.55311000                  |
| H                                            | 0.95241100  | -1.51837700 | 1.54426900                  |
| C                                            | 2.87363600  | -0.60344100 | 1.41327500                  |
| H                                            | 3.41726000  | 0.33292200  | 1.53071700                  |
| S                                            | 4.66958700  | -1.47221300 | -0.48301600                 |
| C                                            | 6.17211900  | -0.73105300 | 0.16193000                  |
| C                                            | 6.34831100  | 0.65851500  | 0.11470800                  |
| C                                            | 7.19307800  | -1.55058700 | 0.66578800                  |
| C                                            | 7.53674400  | 1.22392600  | 0.58066900                  |
| H                                            | 5.56085300  | 1.28836500  | -0.28695000                 |
| C                                            | 8.37455100  | -0.97742800 | 1.13511300                  |
| H                                            | 7.06417400  | -2.62853100 | 0.67726300                  |
| C                                            | 8.54727100  | 0.40856200  | 1.09300800                  |
| H                                            | 7.67252300  | 2.30056800  | 0.54242600                  |
| H                                            | 9.16429400  | -1.61356000 | 1.52294400                  |
| H                                            | 9.47091400  | 0.85079900  | 1.45359600                  |
| C                                            | 3.70290800  | -1.78397600 | 1.08284400                  |
| H                                            | 4.43320200  | -1.97220400 | 1.87611700                  |
| H                                            | 3.10291500  | -2.68036900 | 0.92633000                  |
| H                                            | 1.05069600  | 0.24782000  | 2.06754400                  |
| Zero-point correction=                       |             |             | 0.686174 (Hartree/Particle) |
| Thermal correction to Energy=                |             |             | 0.728004                    |
| Thermal correction to Enthalpy=              |             |             | 0.728949                    |
| Thermal correction to Gibbs Free Energy=     |             |             | 0.609568                    |
| Sum of electronic and zero-point Energies=   |             |             | -2194.868539                |
| Sum of electronic and thermal Energies=      |             |             | -2194.826709                |
| Sum of electronic and thermal Enthalpies=    |             |             | -2194.825764                |
| Sum of electronic and thermal Free Energies= |             |             | -2194.945145                |

E(RB3LYP) = -2196.23042419 A.U.

A-P1

|   |             |             |             |
|---|-------------|-------------|-------------|
| C | -0.48644700 | 0.02174200  | 0.06363700  |
| C | -0.30262300 | 1.52950100  | -0.15183600 |
| O | 0.49081800  | 2.21103100  | 0.46590600  |
| O | -1.04941400 | 2.00832700  | -1.16588200 |
| C | -0.81326200 | 3.38268800  | -1.51062400 |
| H | 0.20827000  | 3.51484100  | -1.87666100 |
| H | -1.53102100 | 3.61369400  | -2.29715100 |
| H | -0.96472000 | 4.03157000  | -0.64501900 |
| C | -1.90756000 | -0.50333300 | -0.16876500 |
| C | -3.02642100 | 0.30769200  | 0.07986000  |
| C | -2.13040700 | -1.84767100 | -0.50132500 |
| C | -4.31969300 | -0.20340200 | -0.02060300 |
| H | -2.89249100 | 1.34721600  | 0.35327400  |
| C | -3.42468100 | -2.35829100 | -0.60523000 |
| H | -1.28450600 | -2.49957700 | -0.68775800 |
| C | -4.52664600 | -1.53818100 | -0.36884800 |
| H | -5.16695500 | 0.44779100  | 0.17412000  |
| H | -3.56700500 | -3.40130700 | -0.87292300 |
| H | -5.53460200 | -1.93371300 | -0.45285900 |
| C | -0.59309900 | 1.06641000  | 3.43748400  |
| H | 0.32295200  | 1.64301500  | 3.34603500  |
| C | -0.87735800 | 0.07267700  | 2.59533700  |
| H | -1.81442000 | -0.46991100 | 2.70597500  |
| S | 0.63057300  | -0.72650500 | -1.29349100 |
| C | 2.29540900  | -0.64332300 | -0.62703500 |
| C | 2.89393600  | -1.81477300 | -0.14068600 |
| C | 3.03979000  | 0.54440100  | -0.67309700 |
| C | 4.21790900  | -1.79683200 | 0.29874700  |
| H | 2.31958800  | -2.73508300 | -0.11443300 |
| C | 4.35875700  | 0.55917700  | -0.22022400 |
| H | 2.58242500  | 1.45150200  | -1.04972200 |
| C | 4.95050800  | -0.60949600 | 0.26312800  |
| H | 4.67441900  | -2.70936000 | 0.67089100  |
| H | 4.92642100  | 1.48447000  | -0.25184100 |
| H | 5.98041500  | -0.59524900 | 0.60758800  |
| C | 0.02708800  | -0.37585100 | 1.47409400  |
| H | 0.11790000  | -1.46787600 | 1.48995400  |
| H | 1.02319800  | 0.04712700  | 1.61183800  |
| H | -1.27146200 | 1.34125500  | 4.24027800  |

Zero-point correction= 0.314870 (Hartree/Particle)

Thermal correction to Energy= 0.335118



|                                              |                          |
|----------------------------------------------|--------------------------|
| Thermal correction to Enthalpy=              | 0.336062                 |
| Thermal correction to Gibbs Free Energy=     | 0.263785                 |
| Sum of electronic and zero-point Energies=   | -1245.076279             |
| Sum of electronic and thermal Energies=      | -1245.056031             |
| Sum of electronic and thermal Enthalpies=    | -1245.055087             |
| Sum of electronic and thermal Free Energies= | -1245.127364             |
| E(RB3LYP) =                                  | -1245.73478237      A.U. |

A-P3

|   |             |             |             |
|---|-------------|-------------|-------------|
| C | 1.81461400  | 0.26450600  | 0.44343900  |
| C | 1.71898400  | 1.67866800  | -0.07019300 |
| O | 2.28564700  | 2.08726200  | -1.06083600 |
| O | 0.91810300  | 2.46857500  | 0.69061000  |
| C | 0.78773800  | 3.82555900  | 0.23102300  |
| H | 0.37262200  | 3.85419800  | -0.77918900 |
| H | 0.11499800  | 4.31044700  | 0.93793300  |
| H | 1.76142100  | 4.32047100  | 0.22419500  |
| C | 3.05751000  | -0.45712800 | -0.01553700 |
| C | 3.17609300  | -0.89650100 | -1.34085500 |
| C | 4.11908300  | -0.68495300 | 0.86693000  |
| C | 4.32506200  | -1.55813500 | -1.76939200 |
| H | 2.36438200  | -0.71151800 | -2.03744200 |
| C | 5.27141700  | -1.34790900 | 0.44019000  |
| H | 4.04536000  | -0.33911300 | 1.89408500  |
| C | 5.37628000  | -1.78789100 | -0.87882100 |
| H | 4.40078900  | -1.89442000 | -2.79940400 |
| H | 6.08532500  | -1.51841600 | 1.13900200  |
| H | 6.27067200  | -2.30602600 | -1.21233600 |
| C | 1.20712100  | -0.08551100 | 1.79026400  |
| H | 0.73726000  | 0.72191800  | 2.33987100  |
| C | 0.52236200  | -0.57535700 | 0.55060600  |
| H | 0.69291700  | -1.62048300 | 0.30437100  |
| S | -2.11823700 | -0.96982900 | 1.09424400  |
| C | -3.62807400 | -0.61381500 | 0.20825500  |
| C | -3.78225900 | 0.45693500  | -0.68239300 |
| C | -4.72353200 | -1.45528200 | 0.46150700  |
| C | -5.00921600 | 0.67090000  | -1.31427400 |
| H | -2.95767800 | 1.13085200  | -0.88505400 |
| C | -5.94697400 | -1.22426100 | -0.16172500 |
| H | -4.61042000 | -2.29466000 | 1.14156600  |
| C | -6.09649700 | -0.16264100 | -1.05737000 |
| H | -5.11148100 | 1.50217700  | -2.00627700 |
| H | -6.78394400 | -1.88501800 | 0.04535500  |
| H | -7.04878400 | 0.01048500  | -1.54898400 |

|                                              |                |             |                             |
|----------------------------------------------|----------------|-------------|-----------------------------|
| C                                            | -0.83557000    | -0.06905700 | 0.12120400                  |
| H                                            | -0.92828600    | 1.00284400  | 0.30000600                  |
| H                                            | -1.00674900    | -0.27300100 | -0.94023600                 |
| H                                            | 1.73855300     | -0.80894600 | 2.39928800                  |
| Zero-point correction=                       |                |             | 0.314669 (Hartree/Particle) |
| Thermal correction to Energy=                |                |             | 0.334895                    |
| Thermal correction to Enthalpy=              |                |             | 0.335840                    |
| Thermal correction to Gibbs Free Energy=     |                |             | 0.263952                    |
| Sum of electronic and zero-point Energies=   |                |             | -1245.072245                |
| Sum of electronic and thermal Energies=      |                |             | -1245.052018                |
| Sum of electronic and thermal Enthalpies=    |                |             | -1245.051074                |
| Sum of electronic and thermal Free Energies= |                |             | -1245.122962                |
| E(RB3LYP) =                                  | -1245.73456793 | A.U.        |                             |

### Re3

|                                              |                |             |                             |
|----------------------------------------------|----------------|-------------|-----------------------------|
| C                                            | -4.25321200    | -0.26757100 | 0.85067100                  |
| H                                            | -4.30504500    | 0.61466600  | 1.48403100                  |
| C                                            | -3.08469500    | -0.79713700 | 0.48314500                  |
| H                                            | -3.06419100    | -1.66928400 | -0.16863800                 |
| C                                            | 1.00112100     | 0.11920100  | -0.20601000                 |
| C                                            | 1.72995300     | 1.10897900  | 0.46229600                  |
| C                                            | 1.60634500     | -1.10836800 | -0.49830600                 |
| C                                            | 3.05148900     | 0.86909400  | 0.84192600                  |
| H                                            | 1.25926000     | 2.06251900  | 0.67881700                  |
| C                                            | 2.92697800     | -1.34721500 | -0.11556800                 |
| H                                            | 1.03963200     | -1.86730700 | -1.02819000                 |
| C                                            | 3.65029900     | -0.35900400 | 0.55501700                  |
| H                                            | 3.61242600     | 1.64126600  | 1.36063900                  |
| H                                            | 3.39112300     | -2.30210000 | -0.34515100                 |
| H                                            | 4.67911500     | -0.54407300 | 0.84986300                  |
| C                                            | -1.75198300    | -0.25332800 | 0.87250100                  |
| H                                            | -1.83613300    | 0.56284100  | 1.59135100                  |
| H                                            | -1.08946100    | -1.02916100 | 1.26258400                  |
| H                                            | -5.19811300    | -0.69904000 | 0.53550500                  |
| Se                                           | -0.81607000    | 0.45417000  | -0.75573100                 |
| Zero-point correction=                       |                |             | 0.161791 (Hartree/Particle) |
| Thermal correction to Energy=                |                |             | 0.172081                    |
| Thermal correction to Enthalpy=              |                |             | 0.173026                    |
| Thermal correction to Gibbs Free Energy=     |                |             | 0.123231                    |
| Sum of electronic and zero-point Energies=   |                |             | -2748.189351                |
| Sum of electronic and thermal Energies=      |                |             | -2748.179061                |
| Sum of electronic and thermal Enthalpies=    |                |             | -2748.178116                |
| Sum of electronic and thermal Free Energies= |                |             | -2748.227911                |
| E(RB3LYP) =                                  | -2750.64618048 | A.U.        |                             |

## B-1a

|    |             |             |             |
|----|-------------|-------------|-------------|
| C  | 1.36173700  | 0.04829700  | -0.56206200 |
| C  | 1.47929400  | -1.08665900 | -1.55002400 |
| O  | 1.32850200  | -0.95950800 | -2.74619500 |
| O  | 1.70578500  | -2.29022100 | -0.95938600 |
| C  | 1.71357600  | -3.42613400 | -1.85008400 |
| H  | 2.47606200  | -3.30075600 | -2.62111000 |
| H  | 1.93491300  | -4.28805100 | -1.22179900 |
| H  | 0.73771200  | -3.53953300 | -2.32695000 |
| C  | 1.90838800  | 1.36222800  | -1.04723000 |
| C  | 3.00205500  | 1.42049000  | -1.93264500 |
| C  | 1.34257500  | 2.57926600  | -0.62306000 |
| C  | 3.50020300  | 2.64440800  | -2.37640900 |
| H  | 3.44878300  | 0.50405100  | -2.30059100 |
| C  | 1.84993200  | 3.80517000  | -1.05524200 |
| H  | 0.48174000  | 2.55681900  | 0.03901500  |
| C  | 2.93135600  | 3.84146900  | -1.93626300 |
| H  | 4.33362300  | 2.66178600  | -3.07217400 |
| H  | 1.38988200  | 4.72884800  | -0.71688000 |
| H  | 3.32075000  | 4.79288500  | -2.28531200 |
| P  | -3.14679800 | -0.14057900 | 0.02077200  |
| Au | -0.76305800 | 0.01323400  | -0.13423400 |
| C  | -3.90547800 | 1.64033500  | -0.01675000 |
| C  | -3.08237900 | 2.55853800  | 0.91819600  |
| C  | -3.75665900 | 2.23194600  | -1.43585700 |
| C  | -5.38991600 | 1.69265900  | 0.39848100  |
| H  | -3.13454800 | 2.27351700  | 1.96732400  |
| H  | -2.02961400 | 2.58910300  | 0.62318300  |
| H  | -3.48115900 | 3.57608300  | 0.83488300  |
| H  | -4.40775700 | 1.75513800  | -2.16920900 |
| H  | -4.04125800 | 3.28913500  | -1.39451300 |
| H  | -2.72441100 | 2.18477600  | -1.79590200 |
| H  | -5.74749000 | 2.72272300  | 0.28706200  |
| H  | -6.02496200 | 1.05918200  | -0.22316100 |
| H  | -5.54287300 | 1.41283800  | 1.44272700  |
| C  | -3.72720000 | -1.15870700 | -1.52500000 |
| C  | -2.93008800 | -0.69390300 | -2.76878200 |
| C  | -3.37127000 | -2.64792900 | -1.32344300 |
| C  | -5.23779500 | -1.04167700 | -1.81612800 |
| H  | -3.10818700 | 0.34433700  | -3.04171400 |
| H  | -1.85273000 | -0.83164800 | -2.63952900 |
| H  | -3.24169900 | -1.31118400 | -3.61926800 |
| H  | -3.97046300 | -3.13324400 | -0.55199200 |

|                                            |             |             |                             |
|--------------------------------------------|-------------|-------------|-----------------------------|
| H                                          | -3.57086100 | -3.17380600 | -2.26362400                 |
| H                                          | -2.31125200 | -2.78731800 | -1.09042200                 |
| H                                          | -5.48156100 | -1.70280500 | -2.65555300                 |
| H                                          | -5.85981700 | -1.34665300 | -0.97228600                 |
| H                                          | -5.52981800 | -0.03239700 | -2.11204200                 |
| C                                          | -3.62440300 | -1.05445900 | 1.66056800                  |
| C                                          | -2.63917300 | -2.22768100 | 1.88264000                  |
| C                                          | -3.42877400 | -0.10120400 | 2.85946300                  |
| C                                          | -5.07114900 | -1.59087300 | 1.67999200                  |
| H                                          | -2.67897000 | -2.98639100 | 1.10350700                  |
| H                                          | -1.60670800 | -1.87431200 | 1.96172500                  |
| H                                          | -2.89755400 | -2.71634500 | 2.82930000                  |
| H                                          | -4.17217900 | 0.69631700  | 2.89743300                  |
| H                                          | -3.53930900 | -0.68596800 | 3.77962500                  |
| H                                          | -2.42863600 | 0.34254000  | 2.86978800                  |
| H                                          | -5.26512400 | -2.03476700 | 2.66330900                  |
| H                                          | -5.81502000 | -0.80685700 | 1.52584300                  |
| H                                          | -5.23967100 | -2.37398100 | 0.93832600                  |
| C                                          | 0.24298500  | 2.11246500  | 3.26110000                  |
| H                                          | 0.33579800  | 2.97160400  | 2.60247900                  |
| C                                          | 1.10122900  | 1.09075200  | 3.21361700                  |
| H                                          | 0.99040600  | 0.25664700  | 3.90421800                  |
| C                                          | 4.15826500  | -0.73219300 | 0.77587100                  |
| C                                          | 4.98004200  | 0.38538000  | 0.59631300                  |
| C                                          | 4.67361000  | -2.03061300 | 0.69791200                  |
| C                                          | 6.33867600  | 0.19068100  | 0.34127800                  |
| H                                          | 4.58177600  | 1.39192000  | 0.64571700                  |
| C                                          | 6.03238700  | -2.20956400 | 0.43768900                  |
| H                                          | 4.02596700  | -2.88910400 | 0.84175100                  |
| C                                          | 6.86326200  | -1.10108300 | 0.26128700                  |
| H                                          | 6.98489800  | 1.05186900  | 0.20362100                  |
| H                                          | 6.44050000  | -3.21369900 | 0.38072500                  |
| H                                          | 7.92106700  | -1.24373000 | 0.06400600                  |
| C                                          | 2.28422400  | 1.04879800  | 2.30209700                  |
| H                                          | 2.34844700  | 1.91438500  | 1.64068200                  |
| H                                          | 3.22126700  | 0.92704800  | 2.85258400                  |
| H                                          | -0.56528100 | 2.13514400  | 3.98498400                  |
| Se                                         | 2.26198600  | -0.59136300 | 1.15654800                  |
| Zero-point correction=                     |             |             | 0.685362 (Hartree/Particle) |
| Thermal correction to Energy=              |             |             | 0.728301                    |
| Thermal correction to Enthalpy=            |             |             | 0.729245                    |
| Thermal correction to Gibbs Free Energy=   |             |             | 0.607526                    |
| Sum of electronic and zero-point Energies= |             |             | -4195.645619                |
| Sum of electronic and thermal Energies=    |             |             | -4195.602679                |

Sum of electronic and thermal Enthalpies= -4195.601735  
 Sum of electronic and thermal Free Energies= -4195.723455  
 E(RB3LYP) = -4199.60711577 A.U.

B-TSa1

1 1

|    |             |             |             |
|----|-------------|-------------|-------------|
| C  | -1.82422200 | -0.57143900 | -0.08091100 |
| C  | -1.78120000 | -0.67791000 | -1.53261500 |
| O  | -1.28710000 | -1.60855800 | -2.16287100 |
| O  | -2.30666500 | 0.41618300  | -2.17597600 |
| C  | -2.20907500 | 0.40562500  | -3.60933200 |
| H  | -2.66571000 | -0.49721200 | -4.01951700 |
| H  | -2.74493400 | 1.29279200  | -3.94701400 |
| H  | -1.16417100 | 0.45152700  | -3.92759800 |
| C  | -1.89999700 | -1.82065400 | 0.73046100  |
| C  | -2.58734400 | -2.96223100 | 0.27406600  |
| C  | -1.26527600 | -1.89692400 | 1.98492900  |
| C  | -2.63725300 | -4.12533700 | 1.04241100  |
| H  | -3.05913400 | -2.94509700 | -0.70231900 |
| C  | -1.32943400 | -3.05410900 | 2.76305200  |
| H  | -0.70275900 | -1.03648700 | 2.33679100  |
| C  | -2.01634200 | -4.17536000 | 2.29265100  |
| H  | -3.16415600 | -4.99604000 | 0.66293600  |
| H  | -0.83149700 | -3.08487400 | 3.72829400  |
| H  | -2.06090500 | -5.08099100 | 2.88998800  |
| P  | 1.81684400  | 2.47596700  | -0.01495400 |
| Au | 0.77663600  | 0.33267000  | -0.15805600 |
| C  | 2.75811600  | 2.53181200  | 1.68023400  |
| C  | 1.85816900  | 1.89594200  | 2.76595600  |
| C  | 4.02099900  | 1.64531300  | 1.60538500  |
| C  | 3.17120900  | 3.95052400  | 2.12573700  |
| H  | 0.91928400  | 2.42364400  | 2.92265400  |
| H  | 1.62669600  | 0.85373100  | 2.52718400  |
| H  | 2.40680900  | 1.90657500  | 3.71505100  |
| H  | 4.80406700  | 2.06553600  | 0.97265100  |
| H  | 4.43675500  | 1.56532200  | 2.61607900  |
| H  | 3.79332100  | 0.63092700  | 1.26626900  |
| H  | 3.74683200  | 3.86844800  | 3.05497300  |
| H  | 3.80615800  | 4.45565600  | 1.39542800  |
| H  | 2.31378000  | 4.59228700  | 2.33763300  |
| C  | 3.06837900  | 2.69128000  | -1.48361000 |
| C  | 3.81120900  | 1.35567900  | -1.71044300 |
| C  | 2.29906100  | 2.97309100  | -2.79272700 |
| C  | 4.10295200  | 3.81559600  | -1.26191500 |

|   |             |             |             |
|---|-------------|-------------|-------------|
| H | 4.39504100  | 1.03030100  | -0.85177100 |
| H | 3.10727700  | 0.56022000  | -1.96863500 |
| H | 4.50156400  | 1.48448600  | -2.55226100 |
| H | 1.85121900  | 3.96694300  | -2.82205800 |
| H | 3.01156600  | 2.91830200  | -3.62343700 |
| H | 1.52077300  | 2.22716200  | -2.97931600 |
| H | 4.71031500  | 3.91149100  | -2.16934500 |
| H | 3.64221400  | 4.78708700  | -1.07611800 |
| H | 4.78875500  | 3.59805600  | -0.44114800 |
| C | 0.48488200  | 3.88334000  | -0.09728600 |
| C | -0.52710400 | 3.55079200  | -1.21947100 |
| C | -0.31967400 | 3.89281100  | 1.21958400  |
| C | 1.05904000  | 5.29520800  | -0.33791700 |
| H | -0.09574300 | 3.59339500  | -2.21769100 |
| H | -0.97913300 | 2.56547500  | -1.08527300 |
| H | -1.33080100 | 4.29584000  | -1.18259500 |
| H | 0.25502100  | 4.26083500  | 2.07085700  |
| H | -1.17390400 | 4.56774200  | 1.09257200  |
| H | -0.71236300 | 2.90152300  | 1.46141500  |
| H | 0.23453000  | 6.01668400  | -0.29640000 |
| H | 1.78779800  | 5.59355400  | 0.41760800  |
| H | 1.52076600  | 5.39978600  | -1.32137200 |
| C | -1.77931600 | 1.11953200  | 4.20454500  |
| H | -1.63163800 | 0.06595400  | 4.42409500  |
| C | -2.58920000 | 1.52899800  | 3.22506400  |
| H | -2.73095800 | 2.59432400  | 3.05219800  |
| C | -4.85356900 | 0.30690800  | -0.18791300 |
| C | -5.47325300 | -0.85493400 | 0.28159500  |
| C | -5.47244400 | 1.12559600  | -1.13538600 |
| C | -6.73908500 | -1.18893100 | -0.20298900 |
| H | -4.98264700 | -1.49791300 | 1.00365500  |
| C | -6.73803400 | 0.77984700  | -1.61265200 |
| H | -4.97668200 | 2.02127900  | -1.49602100 |
| C | -7.37023300 | -0.37417200 | -1.14629600 |
| H | -7.23052200 | -2.08736700 | 0.15747400  |
| H | -7.22816300 | 1.41349400  | -2.34533700 |
| H | -8.35510800 | -0.63963200 | -1.51768800 |
| C | -3.40680600 | 0.60619900  | 2.38260400  |
| H | -3.23869500 | -0.44672100 | 2.61075500  |
| H | -4.47310400 | 0.83719600  | 2.44889700  |
| H | -1.25773200 | 1.83006200  | 4.83790700  |
| C | 3.34406100  | -4.33469700 | -3.12716600 |
| H | 4.19280200  | -3.65665200 | -3.16954100 |
| C | 2.12100300  | -3.91308600 | -2.79736600 |

|                                              |                |             |                             |
|----------------------------------------------|----------------|-------------|-----------------------------|
| H                                            | 1.29297900     | -4.61879700 | -2.76231400                 |
| C                                            | 2.88649700     | -2.72256000 | 0.35624100                  |
| C                                            | 2.82531800     | -3.59738800 | 1.44619100                  |
| C                                            | 4.11392600     | -2.17853600 | -0.03549100                 |
| C                                            | 3.98852300     | -3.91212800 | 2.15244600                  |
| H                                            | 1.87550500     | -4.03644800 | 1.73581100                  |
| C                                            | 5.27542700     | -2.51148900 | 0.66352600                  |
| H                                            | 4.17163500     | -1.50333900 | -0.88198100                 |
| C                                            | 5.21483800     | -3.37383300 | 1.76087300                  |
| H                                            | 3.93553900     | -4.59119700 | 2.99820200                  |
| H                                            | 6.22876200     | -2.09613500 | 0.34966900                  |
| H                                            | 6.12024000     | -3.62908000 | 2.30285800                  |
| C                                            | 1.78624700     | -2.50046600 | -2.46531500                 |
| H                                            | 2.61578700     | -1.81424100 | -2.63984100                 |
| H                                            | 0.88850300     | -2.14220100 | -2.97300200                 |
| H                                            | 3.53776400     | -5.37302500 | -3.37663700                 |
| Se                                           | -3.07666800    | 0.85767300  | 0.41664200                  |
| Se                                           | 1.21395100     | -2.33717500 | -0.54448600                 |
| Zero-point correction=                       |                |             | 0.848196 (Hartree/Particle) |
| Thermal correction to Energy=                |                |             | 0.902552                    |
| Thermal correction to Enthalpy=              |                |             | 0.903496                    |
| Thermal correction to Gibbs Free Energy=     |                |             | 0.754713                    |
| Sum of electronic and zero-point Energies=   |                |             | -6943.353730                |
| Sum of electronic and thermal Energies=      |                |             | -6943.299374                |
| Sum of electronic and thermal Enthalpies=    |                |             | -6943.298430                |
| Sum of electronic and thermal Free Energies= |                |             | -6943.447213                |
| E(RB3LYP) =                                  | -6950.25130102 | A.U.        |                             |

B-2a

|   |             |             |             |
|---|-------------|-------------|-------------|
| C | -0.96136000 | -0.29626600 | -0.39904100 |
| C | -1.66788800 | -1.29511100 | -1.16714100 |
| O | -2.69432100 | -1.13329000 | -1.81610800 |
| O | -1.05105300 | -2.53221400 | -1.13423700 |
| C | -1.73557600 | -3.56490400 | -1.84568000 |
| H | -1.83057000 | -3.31600300 | -2.90605400 |
| H | -1.12698200 | -4.46191000 | -1.72070500 |
| H | -2.73768300 | -3.72834600 | -1.43891100 |
| C | -1.34523000 | 1.11885800  | -0.32546100 |
| C | -2.63412800 | 1.55221800  | -0.72295300 |
| C | -0.46651200 | 2.11472200  | 0.15992900  |
| C | -3.00255000 | 2.89165500  | -0.63612200 |
| H | -3.32857400 | 0.82259600  | -1.11554600 |
| C | -0.84431800 | 3.45406800  | 0.24096200  |
| H | 0.54906200  | 1.85555400  | 0.43260900  |

|                                              |                |             |                             |
|----------------------------------------------|----------------|-------------|-----------------------------|
| C                                            | -2.11884800    | 3.85816000  | -0.15085800                 |
| H                                            | -4.00115200    | 3.18115200  | -0.95345400                 |
| H                                            | -0.12825700    | 4.18419600  | 0.60956200                  |
| H                                            | -2.41482700    | 4.90091600  | -0.08707500                 |
| C                                            | -2.04220500    | -0.89824100 | 2.96101100                  |
| H                                            | -2.47146700    | -0.13446900 | 2.31919500                  |
| C                                            | -0.72110900    | -1.01324500 | 3.12890600                  |
| H                                            | -0.31869200    | -1.80180200 | 3.76193900                  |
| C                                            | 2.10978200     | -0.12486100 | -0.06690500                 |
| C                                            | 2.13219700     | 0.39116000  | -1.36090200                 |
| C                                            | 3.26912500     | -0.18004800 | 0.70768400                  |
| C                                            | 3.32748700     | 0.89972800  | -1.87024900                 |
| H                                            | 1.21879700     | 0.40536900  | -1.94809300                 |
| C                                            | 4.46094300     | 0.33025700  | 0.18982500                  |
| H                                            | 3.25789100     | -0.61772300 | 1.70201200                  |
| C                                            | 4.48937900     | 0.87346300  | -1.09605600                 |
| H                                            | 3.34966600     | 1.31569600  | -2.87301100                 |
| H                                            | 5.36551400     | 0.29839500  | 0.78984500                  |
| H                                            | 5.41779400     | 1.26921700  | -1.49634100                 |
| C                                            | 0.26377600     | -0.16292900 | 2.40313000                  |
| H                                            | -0.07184700    | 0.86049900  | 2.24615100                  |
| H                                            | 1.26142000     | -0.17581300 | 2.84342700                  |
| H                                            | -2.73560400    | -1.55701800 | 3.47423000                  |
| Se                                           | 0.45972700     | -0.99025200 | 0.56066100                  |
| Zero-point correction=                       |                |             | 0.311909 (Hartree/Particle) |
| Thermal correction to Energy=                |                |             | 0.332984                    |
| Thermal correction to Enthalpy=              |                |             | 0.333928                    |
| Thermal correction to Gibbs Free Energy=     |                |             | 0.259131                    |
| Sum of electronic and zero-point Energies=   |                |             | -3246.231608                |
| Sum of electronic and thermal Energies=      |                |             | -3246.210533                |
| Sum of electronic and thermal Enthalpies=    |                |             | -3246.209589                |
| Sum of electronic and thermal Free Energies= |                |             | -3246.284386                |
| E(RB3LYP) =                                  | -3249.01436305 | A.U.        |                             |

#### B-TSa2

|   |            |             |             |
|---|------------|-------------|-------------|
| C | 1.05744800 | 0.19730200  | -0.21444300 |
| C | 2.36775200 | 0.05153000  | -0.84892500 |
| O | 3.08201100 | 0.94614600  | -1.27511700 |
| O | 2.77668600 | -1.26087500 | -0.89869400 |
| C | 4.03167900 | -1.48143600 | -1.55239700 |
| H | 4.83863300 | -0.95028300 | -1.04116900 |
| H | 4.19841300 | -2.55832600 | -1.51139300 |
| H | 3.99567800 | -1.14228900 | -2.59107500 |
| C | 0.41050500 | 1.50080700  | 0.00649400  |



|                                              |                |             |                             |
|----------------------------------------------|----------------|-------------|-----------------------------|
| C                                            | 0.84738300     | 2.67859600  | -0.63975300                 |
| C                                            | -0.67952900    | 1.61701100  | 0.89474100                  |
| C                                            | 0.22276300     | 3.89986900  | -0.39667300                 |
| H                                            | 1.68787800     | 2.62524000  | -1.31742100                 |
| C                                            | -1.29360000    | 2.84148700  | 1.13778100                  |
| H                                            | -1.03961400    | 0.73750000  | 1.41083800                  |
| C                                            | -0.85021700    | 3.99529500  | 0.49063000                  |
| H                                            | 0.58257000     | 4.78705700  | -0.91089400                 |
| H                                            | -2.12567200    | 2.89094500  | 1.83495700                  |
| H                                            | -1.33167500    | 4.95111400  | 0.67539000                  |
| C                                            | 2.26905900     | -0.13176500 | 2.10792800                  |
| H                                            | 2.71347700     | 0.84956700  | 2.22970500                  |
| C                                            | 1.10114900     | -0.47600600 | 2.74199400                  |
| H                                            | 0.53846500     | 0.30294000  | 3.25114700                  |
| C                                            | -1.73106700    | -1.01719200 | -0.35843800                 |
| C                                            | -2.10302600    | -0.36844700 | -1.53900100                 |
| C                                            | -2.70115600    | -1.51353200 | 0.51389400                  |
| C                                            | -3.45501400    | -0.18846700 | -1.82632800                 |
| H                                            | -1.34098000    | 0.00202200  | -2.21574500                 |
| C                                            | -4.05339500    | -1.34323300 | 0.21091800                  |
| H                                            | -2.40680000    | -2.02327800 | 1.42551200                  |
| C                                            | -4.43159000    | -0.67616100 | -0.95466900                 |
| H                                            | -3.74490500    | 0.32819000  | -2.73636700                 |
| H                                            | -4.80862500    | -1.72707200 | 0.89044200                  |
| H                                            | -5.48361800    | -0.53887000 | -1.18551800                 |
| C                                            | 0.46510700     | -1.70204300 | 2.49870600                  |
| H                                            | 1.05458500     | -2.57103400 | 2.22567200                  |
| H                                            | -0.50025100    | -1.91948500 | 2.94665500                  |
| H                                            | 2.87724700     | -0.88409200 | 1.61726000                  |
| Se                                           | 0.13470900     | -1.41010900 | -0.03653700                 |
| Zero-point correction=                       |                |             | 0.311076 (Hartree/Particle) |
| Thermal correction to Energy=                |                |             | 0.331433                    |
| Thermal correction to Enthalpy=              |                |             | 0.332377                    |
| Thermal correction to Gibbs Free Energy=     |                |             | 0.260683                    |
| Sum of electronic and zero-point Energies=   |                |             | -3246.220550                |
| Sum of electronic and thermal Energies=      |                |             | -3246.200193                |
| Sum of electronic and thermal Enthalpies=    |                |             | -3246.199249                |
| Sum of electronic and thermal Free Energies= |                |             | -3246.270943                |
| E(RB3LYP) =                                  | -3249.00499663 | A.U.        |                             |

B-1c

|   |             |             |             |
|---|-------------|-------------|-------------|
| C | -2.25550600 | 0.33803000  | 0.05822500  |
| C | -1.80628600 | -0.93118700 | -0.32274000 |
| O | -0.67763200 | -1.21610700 | -0.83764600 |

|    |             |             |             |
|----|-------------|-------------|-------------|
| O  | -2.68118600 | -1.95521700 | -0.13910300 |
| C  | -2.24496700 | -3.27063100 | -0.52603000 |
| H  | -1.36089500 | -3.57202700 | 0.04049200  |
| H  | -3.08358200 | -3.92801600 | -0.29700300 |
| H  | -2.01800000 | -3.30678500 | -1.59350200 |
| C  | -1.49468800 | 1.59256100  | -0.15469400 |
| C  | -0.91836400 | 1.87882600  | -1.40848500 |
| C  | -1.36225200 | 2.55442400  | 0.86494100  |
| C  | -0.23922700 | 3.07751100  | -1.62830300 |
| H  | -1.02483200 | 1.16321600  | -2.21737600 |
| C  | -0.69992000 | 3.76081600  | 0.63792400  |
| H  | -1.78639100 | 2.35487500  | 1.84550600  |
| C  | -0.13316400 | 4.02819100  | -0.60981000 |
| H  | 0.18115200  | 3.28153000  | -2.60909400 |
| H  | -0.62578400 | 4.49103700  | 1.43849400  |
| H  | 0.37476100  | 4.97074300  | -0.79030600 |
| P  | 3.55847500  | -0.13719200 | 0.02653700  |
| Au | 1.32143700  | -0.57273800 | -0.39524500 |
| C  | 3.67963600  | 0.80749500  | 1.70916000  |
| C  | 2.57303400  | 1.88783200  | 1.76639500  |
| C  | 3.38709500  | -0.16953900 | 2.86865600  |
| C  | 5.05387300  | 1.46923100  | 1.94660200  |
| H  | 2.68268700  | 2.67221600  | 1.02044800  |
| H  | 1.57571300  | 1.45471500  | 1.65204900  |
| H  | 2.61967700  | 2.36490100  | 2.75218800  |
| H  | 4.17760400  | -0.90542900 | 3.02130700  |
| H  | 3.31073800  | 0.41519600  | 3.79191600  |
| H  | 2.43575100  | -0.69261400 | 2.73282300  |
| H  | 5.04620800  | 1.93140100  | 2.94031500  |
| H  | 5.87943200  | 0.75505300  | 1.92921900  |
| H  | 5.26933600  | 2.26285900  | 1.22855500  |
| C  | 4.46936500  | -1.84241000 | 0.11795100  |
| C  | 3.60596500  | -2.84701900 | 0.91907700  |
| C  | 4.60398500  | -2.43357100 | -1.30289800 |
| C  | 5.87109500  | -1.75335000 | 0.75817700  |
| H  | 3.45007200  | -2.56309200 | 1.95808200  |
| H  | 2.62752300  | -2.99508600 | 0.45342600  |
| H  | 4.12456600  | -3.81246900 | 0.91883300  |
| H  | 5.31046600  | -1.88885600 | -1.93029700 |
| H  | 4.98315700  | -3.45691900 | -1.20754600 |
| H  | 3.64061200  | -2.48906800 | -1.81808100 |
| H  | 6.34039200  | -2.74204400 | 0.70175400  |
| H  | 6.52924100  | -1.05226700 | 0.24188700  |
| H  | 5.83370300  | -1.47792400 | 1.81381400  |

|                                              |                |             |                             |
|----------------------------------------------|----------------|-------------|-----------------------------|
| C                                            | 4.24987100     | 0.93802700  | -1.42623500                 |
| C                                            | 3.69358400     | 0.40187900  | -2.76756400                 |
| C                                            | 3.72885800     | 2.38487500  | -1.29124600                 |
| C                                            | 5.79180400     | 0.96464900  | -1.48441600                 |
| H                                            | 4.00504100     | -0.61528900 | -2.99753800                 |
| H                                            | 2.60077000     | 0.44020400  | -2.79278200                 |
| H                                            | 4.06730300     | 1.04750500  | -3.57047900                 |
| H                                            | 4.16987600     | 2.92100700  | -0.44985600                 |
| H                                            | 4.01027400     | 2.92853400  | -2.20002300                 |
| H                                            | 2.63932200     | 2.42583100  | -1.20820100                 |
| H                                            | 6.09537700     | 1.65730800  | -2.27740600                 |
| H                                            | 6.24461200     | 1.31667100  | -0.55576300                 |
| H                                            | 6.22190400     | -0.00820700 | -1.72965000                 |
| C                                            | -3.17038100    | -0.39745800 | 4.42057000                  |
| H                                            | -4.08604300    | 0.04325300  | 4.80730800                  |
| C                                            | -3.08738300    | -0.87894100 | 3.17731700                  |
| H                                            | -2.15785500    | -1.31832400 | 2.82348000                  |
| C                                            | -5.29710100    | 0.02517200  | -0.47015500                 |
| C                                            | -4.93641600    | -0.31891600 | -1.76990300                 |
| C                                            | -6.63436300    | 0.06277500  | -0.06833300                 |
| C                                            | -5.93916700    | -0.65700400 | -2.68079200                 |
| H                                            | -3.89395300    | -0.31677300 | -2.06782000                 |
| C                                            | -7.62702100    | -0.28486300 | -0.98596700                 |
| H                                            | -6.91192800    | 0.36299900  | 0.93825600                  |
| C                                            | -7.27949800    | -0.64552100 | -2.28958700                 |
| H                                            | -5.67004900    | -0.92800300 | -3.69703200                 |
| H                                            | -8.66909300    | -0.26374000 | -0.68283000                 |
| H                                            | -8.05436800    | -0.90924300 | -3.00247500                 |
| C                                            | -4.21812500    | -0.87016300 | 2.20961400                  |
| H                                            | -4.30549000    | -1.78193500 | 1.62269400                  |
| H                                            | -5.17086500    | -0.60638600 | 2.67250100                  |
| H                                            | -2.32728100    | -0.44329700 | 5.10237000                  |
| Se                                           | -3.95255800    | 0.59580000  | 0.83185100                  |
| Zero-point correction=                       |                |             | 0.685599 (Hartree/Particle) |
| Thermal correction to Energy=                |                |             | 0.728528                    |
| Thermal correction to Enthalpy=              |                |             | 0.729472                    |
| Thermal correction to Gibbs Free Energy=     |                |             | 0.606294                    |
| Sum of electronic and zero-point Energies=   |                |             | -4195.636066                |
| Sum of electronic and thermal Energies=      |                |             | -4195.593137                |
| Sum of electronic and thermal Enthalpies=    |                |             | -4195.592193                |
| Sum of electronic and thermal Free Energies= |                |             | -4195.715371                |
| E(RB3LYP) =                                  | -4199.58426729 | A.U.        |                             |

B-TSc2

|    |             |             |             |
|----|-------------|-------------|-------------|
| C  | -2.34720400 | -0.78907300 | -0.24036000 |
| C  | -1.52530200 | -1.84997700 | -0.73539800 |
| O  | -0.29179000 | -1.81231700 | -0.99422200 |
| O  | -2.16716700 | -3.02283200 | -0.89769700 |
| C  | -1.41259500 | -4.14443800 | -1.39806800 |
| H  | -0.59574600 | -4.39472800 | -0.71787300 |
| H  | -2.12765500 | -4.96402800 | -1.45404200 |
| H  | -1.00865400 | -3.92267400 | -2.38776800 |
| C  | -1.88712900 | 0.62254300  | -0.29944400 |
| C  | -1.33324300 | 1.13097700  | -1.49135200 |
| C  | -2.05448300 | 1.50657400  | 0.77954600  |
| C  | -0.95977700 | 2.47144800  | -1.59494700 |
| H  | -1.21827900 | 0.47395700  | -2.34816400 |
| C  | -1.68576700 | 2.84765600  | 0.67436800  |
| H  | -2.49038700 | 1.14201200  | 1.70212100  |
| C  | -1.13708200 | 3.33668700  | -0.51273400 |
| H  | -0.55207600 | 2.84360900  | -2.53055100 |
| H  | -1.83639200 | 3.51304800  | 1.51938400  |
| H  | -0.86372000 | 4.38414300  | -0.59858800 |
| P  | 3.43183000  | 0.34240900  | 0.19667400  |
| Au | 1.40513000  | -0.62603900 | -0.37963200 |
| C  | 4.74198000  | -1.08218100 | 0.25617400  |
| C  | 4.13005200  | -2.31405600 | 0.96552700  |
| C  | 5.08104700  | -1.54186200 | -1.17925900 |
| C  | 6.04803700  | -0.67725000 | 0.97348600  |
| H  | 3.84872100  | -2.13210200 | 2.00079700  |
| H  | 3.25161400  | -2.68682200 | 0.43113100  |
| H  | 4.88199100  | -3.11113700 | 0.96606400  |
| H  | 5.64662200  | -0.80244300 | -1.74762200 |
| H  | 5.70846800  | -2.43682000 | -1.10527200 |
| H  | 4.18619800  | -1.81805100 | -1.74455700 |
| H  | 6.75610100  | -1.50976400 | 0.89472000  |
| H  | 6.52585800  | 0.19742100  | 0.52822700  |
| H  | 5.90111100  | -0.48438700 | 2.03788400  |
| C  | 3.88256900  | 1.63775000  | -1.16838600 |
| C  | 3.52911100  | 1.05477200  | -2.55800000 |
| C  | 3.00985100  | 2.89991800  | -0.99849500 |
| C  | 5.36955800  | 2.05069000  | -1.14783200 |
| H  | 4.08806600  | 0.15708700  | -2.81520100 |
| H  | 2.46207500  | 0.82789600  | -2.63705200 |
| H  | 3.76440100  | 1.81383600  | -3.31264100 |
| H  | 3.26946900  | 3.48663300  | -0.11621900 |
| H  | 3.17923700  | 3.54255500  | -1.86964800 |
| H  | 1.94293500  | 2.66292700  | -0.96868200 |

|                                              |             |             |                             |
|----------------------------------------------|-------------|-------------|-----------------------------|
| H                                            | 5.52054400  | 2.83004400  | -1.90314500                 |
| H                                            | 5.68072300  | 2.46607500  | -0.18747000                 |
| H                                            | 6.04010700  | 1.22755200  | -1.40077400                 |
| C                                            | 3.24686200  | 1.18903800  | 1.92579600                  |
| C                                            | 1.90262300  | 1.95186500  | 1.97551900                  |
| C                                            | 3.17238400  | 0.10929500  | 3.02779900                  |
| C                                            | 4.40091000  | 2.15951200  | 2.25501800                  |
| H                                            | 1.83856400  | 2.77557200  | 1.26804400                  |
| H                                            | 1.05272600  | 1.28875200  | 1.79387600                  |
| H                                            | 1.79050300  | 2.37313500  | 2.98112800                  |
| H                                            | 4.11587500  | -0.41581000 | 3.18140200                  |
| H                                            | 2.92541100  | 0.60735900  | 3.97171900                  |
| H                                            | 2.38571400  | -0.62491800 | 2.83053900                  |
| H                                            | 4.24977100  | 2.54258900  | 3.27055200                  |
| H                                            | 5.38034100  | 1.67807000  | 2.23315800                  |
| H                                            | 4.42722800  | 3.02446800  | 1.58975500                  |
| C                                            | -1.79284700 | -1.68956700 | 2.09829900                  |
| H                                            | -1.56127700 | -2.64180500 | 1.63500700                  |
| C                                            | -3.05069500 | -1.46504300 | 2.62390900                  |
| H                                            | -3.22015500 | -0.56852400 | 3.21714200                  |
| C                                            | -5.04140400 | 0.52996500  | -0.10767600                 |
| C                                            | -5.16537800 | 1.32109400  | -1.25530200                 |
| C                                            | -5.61660900 | 0.93732400  | 1.09924700                  |
| C                                            | -5.84373200 | 2.53783000  | -1.18236900                 |
| H                                            | -4.73646200 | 0.99128000  | -2.19548700                 |
| C                                            | -6.30223800 | 2.15205100  | 1.16064200                  |
| H                                            | -5.53441400 | 0.31722100  | 1.98414100                  |
| C                                            | -6.41264800 | 2.95345700  | 0.02331500                  |
| H                                            | -5.93610800 | 3.15416200  | -2.07131000                 |
| H                                            | -6.75066100 | 2.46817000  | 2.09756200                  |
| H                                            | -6.94807500 | 3.89651800  | 0.07394900                  |
| C                                            | -4.15558100 | -2.19008800 | 2.18919600                  |
| H                                            | -4.02150200 | -3.15970300 | 1.72059000                  |
| H                                            | -5.15396600 | -1.98408800 | 2.56070900                  |
| H                                            | -0.94788100 | -1.06356700 | 2.36383500                  |
| Se                                           | -4.20222600 | -1.20306100 | -0.27984000                 |
| Zero-point correction=                       |             |             | 0.685093 (Hartree/Particle) |
| Thermal correction to Energy=                |             |             | 0.727152                    |
| Thermal correction to Enthalpy=              |             |             | 0.728096                    |
| Thermal correction to Gibbs Free Energy=     |             |             | 0.609294                    |
| Sum of electronic and zero-point Energies=   |             |             | -4195.618175                |
| Sum of electronic and thermal Energies=      |             |             | -4195.576115                |
| Sum of electronic and thermal Enthalpies=    |             |             | -4195.575171                |
| Sum of electronic and thermal Free Energies= |             |             | -4195.693974                |

E(RB3LYP) = -4199.57279116 A.U.

B-1d

|    |             |             |             |
|----|-------------|-------------|-------------|
| C  | -2.25801400 | 0.59118000  | -0.58071800 |
| C  | -1.50484400 | 1.51663700  | -1.39603500 |
| O  | -0.41670600 | 1.27765600  | -1.92491600 |
| O  | -2.09277800 | 2.74186800  | -1.52214800 |
| C  | -1.41184000 | 3.68078700  | -2.36807900 |
| H  | -1.30410200 | 3.28447500  | -3.38056500 |
| H  | -2.03731500 | 4.57332500  | -2.37410200 |
| H  | -0.42078400 | 3.91316800  | -1.97072900 |
| C  | -1.77526500 | -0.73553300 | -0.25829700 |
| C  | -0.83759300 | -1.41059800 | -1.12393600 |
| C  | -2.22101900 | -1.47286700 | 0.86508600  |
| C  | -0.46869600 | -2.76214100 | -0.87534400 |
| H  | -0.65597000 | -0.98993900 | -2.10758200 |
| C  | -1.81588900 | -2.78184300 | 1.10295400  |
| H  | -2.92435600 | -1.02461500 | 1.55450600  |
| C  | -0.93236700 | -3.44505900 | 0.24381900  |
| H  | 0.16013300  | -3.26553900 | -1.60423100 |
| H  | -2.20331900 | -3.29838900 | 1.97682000  |
| H  | -0.63793500 | -4.47177300 | 0.43155000  |
| P  | 3.41482500  | 0.02989300  | 0.19518800  |
| Au | 1.24935100  | -0.69231500 | -0.38007800 |
| C  | 3.50677000  | 0.22084400  | 2.11880800  |
| C  | 2.20253100  | 0.88654100  | 2.62014200  |
| C  | 3.55668700  | -1.17283300 | 2.78185100  |
| C  | 4.72009300  | 1.04564900  | 2.59746500  |
| H  | 2.05640400  | 1.89872700  | 2.24720900  |
| H  | 1.32364900  | 0.29336400  | 2.35024400  |
| H  | 2.24765100  | 0.94117300  | 3.71409500  |
| H  | 4.50081600  | -1.69384400 | 2.61746700  |
| H  | 3.45205300  | -1.03557000 | 3.86386000  |
| H  | 2.73447100  | -1.81461200 | 2.45262500  |
| H  | 4.72859200  | 1.04766600  | 3.69344300  |
| H  | 5.67240300  | 0.62710100  | 2.26676500  |
| H  | 4.67273300  | 2.08765700  | 2.27624800  |
| C  | 4.67313400  | -1.30680700 | -0.42496400 |
| C  | 4.12424400  | -2.71717400 | -0.10167500 |
| C  | 4.78612800  | -1.23334900 | -1.96380300 |
| C  | 6.08001900  | -1.15496200 | 0.19050900  |
| H  | 4.02885500  | -2.91866200 | 0.96359200  |
| H  | 3.14995900  | -2.88547900 | -0.56891700 |
| H  | 4.82326600  | -3.45451000 | -0.51251500 |

|                                            |             |             |                             |
|--------------------------------------------|-------------|-------------|-----------------------------|
| H                                          | 5.29294900  | -0.33423600 | -2.31621400                 |
| H                                          | 5.38108100  | -2.08970100 | -2.29991400                 |
| H                                          | 3.80959900  | -1.30343900 | -2.45211800                 |
| H                                          | 6.73891600  | -1.90421700 | -0.26266900                 |
| H                                          | 6.52351400  | -0.17580500 | 0.00134700                  |
| H                                          | 6.08623600  | -1.33400000 | 1.26711300                  |
| C                                          | 3.72059600  | 1.72708800  | -0.68611600                 |
| C                                          | 3.15821700  | 1.66172400  | -2.12745400                 |
| C                                          | 2.91614400  | 2.83308800  | 0.03107400                  |
| C                                          | 5.20861600  | 2.13289900  | -0.72716700                 |
| H                                          | 3.63532700  | 0.90810700  | -2.75110400                 |
| H                                          | 2.07835400  | 1.49132900  | -2.13453600                 |
| H                                          | 3.34218300  | 2.63401300  | -2.59985000                 |
| H                                          | 3.30226700  | 3.07366500  | 1.02274600                  |
| H                                          | 2.99101600  | 3.74510700  | -0.57158700                 |
| H                                          | 1.85491900  | 2.57926800  | 0.10685000                  |
| H                                          | 5.28223700  | 3.13136400  | -1.17284300                 |
| H                                          | 5.66432000  | 2.18516400  | 0.26363700                  |
| H                                          | 5.80853700  | 1.46361500  | -1.34648900                 |
| C                                          | -1.53768700 | 2.19301700  | 2.94575100                  |
| H                                          | -1.37386500 | 1.17203400  | 3.28088400                  |
| C                                          | -2.66654400 | 2.56030800  | 2.33317800                  |
| H                                          | -2.79973700 | 3.59269000  | 2.01576600                  |
| C                                          | -5.11873600 | -0.23024200 | -0.00829300                 |
| C                                          | -6.09299800 | -0.38671300 | 0.97930600                  |
| C                                          | -5.07865300 | -1.07008100 | -1.12344800                 |
| C                                          | -7.02695700 | -1.41837800 | 0.85430300                  |
| H                                          | -6.14336300 | 0.27297200  | 1.83818300                  |
| C                                          | -6.01666800 | -2.09657900 | -1.23474300                 |
| H                                          | -4.32383900 | -0.92936800 | -1.88980400                 |
| C                                          | -6.98892400 | -2.27300900 | -0.24779300                 |
| H                                          | -7.78435300 | -1.54751200 | 1.62112300                  |
| H                                          | -5.98649400 | -2.75586400 | -2.09657900                 |
| H                                          | -7.71791700 | -3.07178000 | -0.34017200                 |
| C                                          | -3.78883400 | 1.62847600  | 2.05228900                  |
| H                                          | -3.69388400 | 0.66596500  | 2.55378700                  |
| H                                          | -4.76502000 | 2.07276600  | 2.26138000                  |
| H                                          | -0.75035600 | 2.91024500  | 3.15380700                  |
| Se                                         | -3.89220500 | 1.28711200  | 0.02412800                  |
| Zero-point correction=                     |             |             | 0.685201 (Hartree/Particle) |
| Thermal correction to Energy=              |             |             | 0.728186                    |
| Thermal correction to Enthalpy=            |             |             | 0.729131                    |
| Thermal correction to Gibbs Free Energy=   |             |             | 0.605938                    |
| Sum of electronic and zero-point Energies= |             |             | -4195.623321                |

|                                              |                         |
|----------------------------------------------|-------------------------|
| Sum of electronic and thermal Energies=      | -4195.580335            |
| Sum of electronic and thermal Enthalpies=    | -4195.579391            |
| Sum of electronic and thermal Free Energies= | -4195.702583            |
| E(RB3LYP) =                                  | -4199.57647645     A.U. |

B-TSd2

|    |             |             |             |
|----|-------------|-------------|-------------|
| C  | -2.30452700 | 0.80948300  | -0.31102400 |
| C  | -1.48685800 | 1.81968900  | -0.97524100 |
| O  | -0.31533000 | 1.68182800  | -1.33330300 |
| O  | -2.14244800 | 2.99645400  | -1.12989400 |
| C  | -1.41468500 | 4.05572500  | -1.77294900 |
| H  | -1.08271600 | 3.74716300  | -2.76667500 |
| H  | -2.11582400 | 4.88636200  | -1.84614400 |
| H  | -0.54408300 | 4.34309700  | -1.17809900 |
| C  | -1.82785400 | -0.57308000 | -0.18780000 |
| C  | -0.94245000 | -1.14030300 | -1.16238800 |
| C  | -2.24875200 | -1.41902900 | 0.85577700  |
| C  | -0.55458800 | -2.50124500 | -1.07805700 |
| H  | -0.75450600 | -0.59034600 | -2.07926700 |
| C  | -1.84357000 | -2.75267000 | 0.93348200  |
| H  | -2.92829700 | -1.03637200 | 1.60776300  |
| C  | -0.99077800 | -3.30588800 | -0.02126200 |
| H  | 0.04148800  | -2.92640300 | -1.88036600 |
| H  | -2.20632400 | -3.36653500 | 1.75270900  |
| H  | -0.69144100 | -4.34686200 | 0.03726900  |
| P  | 3.44300400  | -0.03742000 | 0.19105800  |
| Au | 1.23262600  | -0.62314700 | -0.35298900 |
| C  | 3.57769100  | 0.17789900  | 2.10936300  |
| C  | 2.31886500  | 0.91607000  | 2.62194800  |
| C  | 3.57229100  | -1.20494900 | 2.79724500  |
| C  | 4.84112100  | 0.94877100  | 2.54697200  |
| H  | 2.20337000  | 1.91929200  | 2.21532600  |
| H  | 1.40936400  | 0.34902500  | 2.40287500  |
| H  | 2.39764200  | 1.00995500  | 3.71105800  |
| H  | 4.48450700  | -1.77746100 | 2.62364900  |
| H  | 3.49884300  | -1.04198200 | 3.87819600  |
| H  | 2.71063300  | -1.80941400 | 2.49957400  |
| H  | 4.87661700  | 0.96251800  | 3.64214400  |
| H  | 5.76307000  | 0.48037400  | 2.19818800  |
| H  | 4.83640400  | 1.98818500  | 2.21430000  |
| C  | 4.60669200  | -1.45819700 | -0.42733700 |
| C  | 3.98055700  | -2.82708600 | -0.06975300 |
| C  | 4.69678900  | -1.41766600 | -1.96818500 |
| C  | 6.03093900  | -1.37912300 | 0.16181700  |



|                               |             |             |                             |
|-------------------------------|-------------|-------------|-----------------------------|
| H                             | 3.88865800  | -3.00397300 | 1.00013800                  |
| H                             | 2.99180000  | -2.94393600 | -0.52193400                 |
| H                             | 4.62873100  | -3.61157300 | -0.47647400                 |
| H                             | 5.23915600  | -0.54997400 | -2.34508200                 |
| H                             | 5.24428800  | -2.30738000 | -2.29806900                 |
| H                             | 3.70898800  | -1.45025300 | -2.43754400                 |
| H                             | 6.63169700  | -2.18212900 | -0.27987000                 |
| H                             | 6.53370000  | -0.43726100 | -0.06433900                 |
| H                             | 6.04669800  | -1.52719400 | 1.24292600                  |
| C                             | 3.82686400  | 1.62479600  | -0.72772700                 |
| C                             | 3.23963300  | 1.56662800  | -2.15929200                 |
| C                             | 3.09686500  | 2.78799700  | -0.02048300                 |
| C                             | 5.33517000  | 1.94220800  | -0.79799400                 |
| H                             | 3.66902600  | 0.78351300  | -2.78131300                 |
| H                             | 2.15308800  | 1.44945400  | -2.14212100                 |
| H                             | 3.45917600  | 2.52333700  | -2.64746400                 |
| H                             | 3.50003800  | 3.01549100  | 0.96724400                  |
| H                             | 3.23029700  | 3.68571900  | -0.63435600                 |
| H                             | 2.02146100  | 2.60464100  | 0.05435100                  |
| H                             | 5.45848700  | 2.92754100  | -1.26137500                 |
| H                             | 5.80769000  | 1.98491600  | 0.18520100                  |
| H                             | 5.88672100  | 1.22982600  | -1.41449500                 |
| C                             | -1.55628600 | 1.81492000  | 1.93660800                  |
| H                             | -1.60927900 | 0.78322300  | 2.26422400                  |
| C                             | -2.62929800 | 2.66480400  | 2.09264500                  |
| H                             | -2.50890700 | 3.71558400  | 1.84032600                  |
| C                             | -5.07728600 | -0.41803400 | -0.08485000                 |
| C                             | -5.90977800 | -0.67587200 | 1.00850300                  |
| C                             | -5.03812200 | -1.30188500 | -1.16966800                 |
| C                             | -6.68800600 | -1.83594600 | 1.02499100                  |
| H                             | -5.96317700 | 0.01939700  | 1.83951900                  |
| C                             | -5.80967000 | -2.46325200 | -1.13866500                 |
| H                             | -4.41689300 | -1.08269800 | -2.03159400                 |
| C                             | -6.63400800 | -2.73209300 | -0.04306000                 |
| H                             | -7.33560200 | -2.03463700 | 1.87344700                  |
| H                             | -5.77659000 | -3.15072600 | -1.97839300                 |
| H                             | -7.23984600 | -3.63273100 | -0.02754500                 |
| C                             | -3.92172700 | 2.17270200  | 2.27835700                  |
| H                             | -4.06807800 | 1.17998100  | 2.69276100                  |
| H                             | -4.77427300 | 2.84106900  | 2.33650600                  |
| H                             | -0.56635500 | 2.19253100  | 1.70479200                  |
| Se                            | -4.13444400 | 1.26997400  | -0.19052800                 |
| Zero-point correction=        |             |             | 0.684470 (Hartree/Particle) |
| Thermal correction to Energy= |             |             | 0.726692                    |

|                                              |                         |
|----------------------------------------------|-------------------------|
| Thermal correction to Enthalpy=              | 0.727636                |
| Thermal correction to Gibbs Free Energy=     | 0.608647                |
| Sum of electronic and zero-point Energies=   | -4195.610073            |
| Sum of electronic and thermal Energies=      | -4195.567850            |
| Sum of electronic and thermal Enthalpies=    | -4195.566906            |
| Sum of electronic and thermal Free Energies= | -4195.685895            |
| E(RB3LYP) =                                  | -4199.56384297     A.U. |

B-P1

|   |             |             |             |
|---|-------------|-------------|-------------|
| C | -0.60878900 | 0.16120800  | 0.18602500  |
| C | -0.49421300 | 1.63845800  | -0.18276100 |
| O | 0.25440900  | 2.42478100  | 0.36292000  |
| O | -1.25644800 | 1.96529300  | -1.24759900 |
| C | -1.07067600 | 3.29701300  | -1.75113300 |
| H | -0.05726800 | 3.41629100  | -2.14370700 |
| H | -1.80258900 | 3.41243200  | -2.55014100 |
| H | -1.23536900 | 4.03685500  | -0.96472000 |
| C | -1.99011600 | -0.46871300 | 0.02135900  |
| C | -3.15925800 | 0.29115400  | 0.17706100  |
| C | -2.12084700 | -1.85609000 | -0.14484500 |
| C | -4.41557500 | -0.31367500 | 0.14870300  |
| H | -3.09259000 | 1.36298200  | 0.31971400  |
| C | -3.37679700 | -2.46062100 | -0.17655200 |
| H | -1.22569100 | -2.45431700 | -0.27767100 |
| C | -4.53146400 | -1.69184800 | -0.03163100 |
| H | -5.30526600 | 0.29797500  | 0.26768200  |
| H | -3.44979600 | -3.53539300 | -0.31552500 |
| H | -5.51058400 | -2.16092800 | -0.05969300 |
| C | -0.66729300 | 1.43329100  | 3.47489800  |
| H | 0.21216800  | 2.05103300  | 3.31695500  |
| C | -0.91650000 | 0.36926900  | 2.71146900  |
| H | -1.81919500 | -0.21376300 | 2.88565700  |
| C | 2.34306700  | -0.55843400 | -0.43230900 |
| C | 2.91684700  | -1.71538000 | 0.10792300  |
| C | 3.06731000  | 0.63967500  | -0.44467700 |
| C | 4.20812900  | -1.67412600 | 0.63505600  |
| H | 2.34997800  | -2.64055500 | 0.10976000  |
| C | 4.35232400  | 0.67945800  | 0.09689000  |
| H | 2.61780600  | 1.53453600  | -0.85938400 |
| C | 4.92477500  | -0.47619500 | 0.63314400  |
| H | 4.65070500  | -2.57474400 | 1.05069900  |
| H | 4.90833800  | 1.61240000  | 0.09450100  |
| H | 5.92841300  | -0.44318400 | 1.04695400  |
| C | -0.02076500 | -0.10211800 | 1.59272500  |

|                                              |                |             |                             |
|----------------------------------------------|----------------|-------------|-----------------------------|
| H                                            | 0.14675500     | -1.18104700 | 1.68372900                  |
| H                                            | 0.94824300     | 0.39336600  | 1.66347200                  |
| H                                            | -1.33812300    | 1.72597500  | 4.27772100                  |
| Se                                           | 0.60145400     | -0.67395500 | -1.24107800                 |
| Zero-point correction=                       |                |             | 0.314248 (Hartree/Particle) |
| Thermal correction to Energy=                |                |             | 0.334878                    |
| Thermal correction to Enthalpy=              |                |             | 0.335822                    |
| Thermal correction to Gibbs Free Energy=     |                |             | 0.262503                    |
| Sum of electronic and zero-point Energies=   |                |             | -3246.282646                |
| Sum of electronic and thermal Energies=      |                |             | -3246.262016                |
| Sum of electronic and thermal Enthalpies=    |                |             | -3246.261072                |
| Sum of electronic and thermal Free Energies= |                |             | -3246.334390                |
| E(RB3LYP) =                                  | -3249.06785047 | A.U.        |                             |

#### B-P3

|   |             |             |             |
|---|-------------|-------------|-------------|
| C | -2.04341700 | 0.37119600  | -0.32353000 |
| C | -1.91877400 | 1.75292300  | 0.26408900  |
| O | -2.49882700 | 2.12837800  | 1.26032200  |
| O | -1.07236300 | 2.55341900  | -0.43327500 |
| C | -0.90273500 | 3.87541200  | 0.10731700  |
| H | -0.50638900 | 3.82948700  | 1.12440800  |
| H | -0.19901700 | 4.37558300  | -0.55765300 |
| H | -1.85771600 | 4.40527500  | 0.12622700  |
| C | -3.31678500 | -0.33581400 | 0.06825200  |
| C | -3.47879400 | -0.84447400 | 1.36381900  |
| C | -4.36464800 | -0.48069700 | -0.84768300 |
| C | -4.65673000 | -1.49249400 | 1.73021700  |
| H | -2.67761300 | -0.72415900 | 2.08627900  |
| C | -5.54604700 | -1.12938500 | -0.48323800 |
| H | -4.25659900 | -0.08063700 | -1.85187400 |
| C | -5.69404200 | -1.63889200 | 0.80636000  |
| H | -4.76607900 | -1.88306100 | 2.73785400  |
| H | -6.34888600 | -1.23459200 | -1.20733700 |
| H | -6.61117400 | -2.14622200 | 1.09128700  |
| C | -1.41149000 | 0.06627200  | -1.67043300 |
| H | -0.90228100 | 0.88207200  | -2.17075900 |
| C | -0.76908500 | -0.49710300 | -0.43916800 |
| H | -0.96436700 | -1.55039100 | -0.25181700 |
| C | 3.50951400  | -0.52293400 | -0.08332900 |
| C | 4.25326000  | 0.62541400  | -0.37531200 |
| C | 3.91683100  | -1.36617500 | 0.95638900  |
| C | 5.39106100  | 0.93202900  | 0.37275100  |
| H | 3.93856400  | 1.27124300  | -1.18882100 |
| C | 5.05322200  | -1.05656400 | 1.70501800  |

|                                              |                |             |                             |
|----------------------------------------------|----------------|-------------|-----------------------------|
| H                                            | 3.34340800     | -2.26248000 | 1.17066500                  |
| C                                            | 5.79093900     | 0.09258700  | 1.41408400                  |
| H                                            | 5.96480400     | 1.82487300  | 0.14113700                  |
| H                                            | 5.36413900     | -1.71484200 | 2.51120300                  |
| H                                            | 6.67727500     | 0.33096900  | 1.99480200                  |
| C                                            | 0.59538300     | -0.04950300 | 0.01322400                  |
| H                                            | 0.73600300     | 1.02249900  | -0.11047000                 |
| H                                            | 0.79764300     | -0.33952000 | 1.04628200                  |
| H                                            | -1.94993400    | -0.61124300 | -2.32464800                 |
| Se                                           | 1.95122800     | -0.96058900 | -1.13106200                 |
| Zero-point correction=                       |                |             | 0.315255 (Hartree/Particle) |
| Thermal correction to Energy=                |                |             | 0.335383                    |
| Thermal correction to Enthalpy=              |                |             | 0.336327                    |
| Thermal correction to Gibbs Free Energy=     |                |             | 0.261846                    |
| Sum of electronic and zero-point Energies=   |                |             | -3246.277426                |
| Sum of electronic and thermal Energies=      |                |             | -3246.257297                |
| Sum of electronic and thermal Enthalpies=    |                |             | -3246.256353                |
| Sum of electronic and thermal Free Energies= |                |             | -3246.330834                |
| E(RB3LYP) =                                  | -3249.06505566 |             | A.U.                        |

|||||

Re4

|   |             |             |             |
|---|-------------|-------------|-------------|
| C | 4.16549000  | -0.52623800 | 0.04401200  |
| H | 4.48147400  | -0.01941000 | -0.86524200 |
| C | 2.87843300  | -0.76096400 | 0.29851900  |
| H | 2.58616200  | -1.26058000 | 1.22158400  |
| C | -0.60767200 | 0.15414700  | 0.02004600  |
| C | -1.03612800 | -1.19049300 | 0.07773000  |
| C | -1.60148900 | 1.15302200  | -0.03118800 |
| C | -2.38916100 | -1.51225500 | 0.06280800  |
| H | -0.30699300 | -1.98871300 | 0.16818500  |
| C | -2.95509000 | 0.81639000  | -0.03110800 |
| H | -1.32204000 | 2.19814900  | -0.08848500 |
| C | -3.36533900 | -0.51462100 | 0.00880300  |
| H | -2.68198300 | -2.55766200 | 0.11104800  |
| H | -3.69370400 | 1.61237600  | -0.07505200 |
| H | -4.41991800 | -0.77098600 | 0.00430100  |
| C | 1.74311100  | -0.36959000 | -0.61227900 |
| H | 2.14388500  | 0.14743600  | -1.49936500 |
| H | 1.23823600  | -1.26526700 | -0.98338400 |
| H | 4.95139800  | -0.83830300 | 0.72507500  |
| N | 0.75476000  | 0.47723500  | 0.06091900  |
| C | 1.15430700  | 1.86688300  | 0.18810100  |
| H | 0.61906700  | 2.34550600  | 1.01263000  |
| H | 2.22205100  | 1.90205800  | 0.41763300  |

|                                              |                |            |                             |
|----------------------------------------------|----------------|------------|-----------------------------|
| H                                            | 0.98028100     | 2.45705800 | -0.72802700                 |
| Zero-point correction=                       |                |            | 0.207028 (Hartree/Particle) |
| Thermal correction to Energy=                |                |            | 0.217684                    |
| Thermal correction to Enthalpy=              |                |            | 0.218628                    |
| Thermal correction to Gibbs Free Energy=     |                |            | 0.169742                    |
| Sum of electronic and zero-point Energies=   |                |            | -443.419106                 |
| Sum of electronic and thermal Energies=      |                |            | -443.408451                 |
| Sum of electronic and thermal Enthalpies=    |                |            | -443.407507                 |
| Sum of electronic and thermal Free Energies= |                |            | -443.456392                 |
| E(RB3LYP) =                                  | -443.785504195 | A.U.       |                             |

C-TS1

|    |             |             |             |
|----|-------------|-------------|-------------|
| C  | 0.88680200  | -1.03813500 | 0.44119100  |
| C  | 0.78333300  | -2.53547200 | 0.40104800  |
| O  | 0.84370400  | -3.21625800 | 1.40847400  |
| O  | 0.48145500  | -3.05099100 | -0.81133700 |
| C  | 0.21805700  | -4.47014300 | -0.82513200 |
| H  | -0.65910700 | -4.70011500 | -0.21631900 |
| H  | 0.03833600  | -4.72116700 | -1.86975600 |
| H  | 1.07436800  | -5.02510300 | -0.43624900 |
| C  | 1.85110600  | -0.45122100 | 1.35425800  |
| C  | 2.93772900  | -1.18356300 | 1.90067200  |
| C  | 1.72237300  | 0.90667600  | 1.73973800  |
| C  | 3.80388700  | -0.60168300 | 2.81947000  |
| H  | 3.06324400  | -2.22608500 | 1.63785000  |
| C  | 2.59559200  | 1.48969000  | 2.65026800  |
| H  | 0.90618100  | 1.48743900  | 1.32198800  |
| C  | 3.63706000  | 0.73408100  | 3.19838200  |
| H  | 4.60590700  | -1.19283500 | 3.25107300  |
| H  | 2.45893100  | 2.52557000  | 2.94557700  |
| H  | 4.30989100  | 1.18144200  | 3.92428000  |
| P  | -3.29955000 | 0.51232400  | -0.14105300 |
| Au | -1.02701200 | -0.22759000 | 0.12891800  |
| C  | -3.80584000 | 0.25093600  | -1.99258500 |
| C  | -2.64906400 | 0.72588100  | -2.90550500 |
| C  | -3.97186600 | -1.25933000 | -2.27408700 |
| C  | -5.10484000 | 0.97821400  | -2.39567800 |
| H  | -2.43586500 | 1.79038800  | -2.82753200 |
| H  | -1.72659200 | 0.17376700  | -2.70140800 |
| H  | -2.93088800 | 0.52559500  | -3.94560400 |
| H  | -4.84876700 | -1.69167700 | -1.79127500 |
| H  | -4.10358100 | -1.39035900 | -3.35398600 |
| H  | -3.08662900 | -1.83155700 | -1.98049300 |
| H  | -5.34609900 | 0.71456500  | -3.43200500 |

|   |             |             |             |
|---|-------------|-------------|-------------|
| H | -5.95763300 | 0.68857600  | -1.77935900 |
| H | -5.00787700 | 2.06501600  | -2.35816400 |
| C | -4.40239100 | -0.57737900 | 1.02322200  |
| C | -3.90843400 | -2.04289200 | 0.95174300  |
| C | -4.20561600 | -0.13355800 | 2.48991000  |
| C | -5.90787700 | -0.52927500 | 0.68747800  |
| H | -4.01561900 | -2.49317400 | -0.03338800 |
| H | -2.86102800 | -2.12838200 | 1.25560500  |
| H | -4.50626100 | -2.63860900 | 1.65096300  |
| H | -4.64245400 | 0.84240800  | 2.70583800  |
| H | -4.71374900 | -0.86050700 | 3.13311200  |
| H | -3.15136200 | -0.12529700 | 2.78158600  |
| H | -6.45014800 | -1.11466800 | 1.43891300  |
| H | -6.31590400 | 0.48317700  | 0.70867000  |
| H | -6.13705500 | -0.97083900 | -0.28435400 |
| C | -3.44438700 | 2.38177600  | 0.34276400  |
| C | -2.60196000 | 2.63716800  | 1.61597000  |
| C | -2.81360200 | 3.25131000  | -0.76659900 |
| C | -4.89124800 | 2.85833600  | 0.58604500  |
| H | -2.95053100 | 2.09120700  | 2.49043700  |
| H | -1.54910300 | 2.38692600  | 1.45648900  |
| H | -2.65768200 | 3.70591100  | 1.85332800  |
| H | -3.40373800 | 3.27055900  | -1.68359700 |
| H | -2.75527700 | 4.28238300  | -0.40032800 |
| H | -1.79514900 | 2.93134600  | -1.00724500 |
| H | -4.87424800 | 3.93548000  | 0.78874900  |
| H | -5.53970900 | 2.70065200  | -0.27770400 |
| H | -5.35079900 | 2.37859800  | 1.45186600  |
| C | 8.87364800  | 0.78093500  | -1.13854900 |
| H | 9.24727400  | 1.29638900  | -0.25650600 |
| C | 7.61921100  | 0.33719500  | -1.21385900 |
| H | 7.27299500  | -0.17551000 | -2.11035000 |
| C | 4.27247400  | 0.62949600  | -0.95739400 |
| C | 4.19538800  | -0.79109900 | -1.12577300 |
| C | 3.10228700  | 1.39808000  | -1.27463400 |
| C | 3.01468200  | -1.38893600 | -1.49378600 |
| H | 5.08035600  | -1.40232400 | -1.00703800 |
| C | 1.93276100  | 0.77826300  | -1.63363200 |
| H | 3.13842100  | 2.47844100  | -1.22761300 |
| C | 1.81968700  | -0.63803000 | -1.65091300 |
| H | 2.98335400  | -2.46375700 | -1.63767400 |
| H | 1.06047500  | 1.38199700  | -1.86540200 |
| H | 0.95709400  | -1.10629100 | -2.10359600 |
| C | 6.60565100  | 0.50093100  | -0.10995700 |

|                                              |                |             |                             |
|----------------------------------------------|----------------|-------------|-----------------------------|
| H                                            | 6.28675400     | -0.46472100 | 0.29006400                  |
| H                                            | 7.04789300     | 1.05002200  | 0.72690400                  |
| H                                            | 9.57949900     | 0.63351600  | -1.94974600                 |
| N                                            | 5.40649100     | 1.24341000  | -0.54249900                 |
| C                                            | 5.52433300     | 2.70284800  | -0.55313800                 |
| H                                            | 6.56468200     | 2.96774600  | -0.36789500                 |
| H                                            | 5.24454200     | 3.11725900  | -1.52586800                 |
| H                                            | 4.89954900     | 3.15887700  | 0.22324300                  |
| Zero-point correction=                       |                |             | 0.730821 (Hartree/Particle) |
| Thermal correction to Energy=                |                |             | 0.773784                    |
| Thermal correction to Enthalpy=              |                |             | 0.774728                    |
| Thermal correction to Gibbs Free Energy=     |                |             | 0.653311                    |
| Sum of electronic and zero-point Energies=   |                |             | -1891.310012                |
| Sum of electronic and thermal Energies=      |                |             | -1891.267049                |
| Sum of electronic and thermal Enthalpies=    |                |             | -1891.266105                |
| Sum of electronic and thermal Free Energies= |                |             | -1891.387522                |
| E(RB3LYP) =                                  | -1892.71817792 | A.U.        |                             |

#### C-TS11

|    |             |             |             |
|----|-------------|-------------|-------------|
| C  | -1.32692800 | 0.50734600  | 0.34149200  |
| C  | -1.61022400 | 1.95118400  | 0.00926400  |
| O  | -2.00830200 | 2.42308300  | -1.04224300 |
| O  | -1.25291700 | 2.71821400  | 1.06036700  |
| C  | -1.30880300 | 4.14590800  | 0.84373500  |
| H  | -2.32035700 | 4.45275400  | 0.57066900  |
| H  | -1.01226000 | 4.59094700  | 1.79227600  |
| H  | -0.61966300 | 4.43683700  | 0.04778300  |
| C  | -1.99624200 | -0.06581600 | 1.49918200  |
| C  | -3.16399700 | 0.51557400  | 2.05403800  |
| C  | -1.49139500 | -1.24123300 | 2.10955700  |
| C  | -3.77923300 | -0.03951400 | 3.17245600  |
| H  | -3.56399700 | 1.42819700  | 1.62565700  |
| C  | -2.11425200 | -1.79993700 | 3.21653900  |
| H  | -0.59800900 | -1.69909500 | 1.69782000  |
| C  | -3.26180300 | -1.20102500 | 3.75215000  |
| H  | -4.65857600 | 0.43474500  | 3.59753600  |
| H  | -1.70637700 | -2.69602700 | 3.67392800  |
| H  | -3.74187900 | -1.63219700 | 4.62553000  |
| P  | 3.11897800  | -0.05987400 | -0.15599200 |
| Au | 0.73434000  | 0.16537200  | 0.02372100  |
| C  | 3.74745800  | 1.09704100  | -1.57724300 |
| C  | 2.77421100  | 0.98543100  | -2.77598000 |
| C  | 3.68427300  | 2.56884200  | -1.11283500 |
| C  | 5.18318200  | 0.78679900  | -2.04890700 |

|   |             |             |             |
|---|-------------|-------------|-------------|
| H | 2.73967100  | -0.00711000 | -3.22181300 |
| H | 1.75693100  | 1.27106400  | -2.49139200 |
| H | 3.10823600  | 1.68072500  | -3.55452600 |
| H | 4.43020100  | 2.81119400  | -0.35485400 |
| H | 3.88880000  | 3.20702300  | -1.97962800 |
| H | 2.69379200  | 2.83941600  | -0.73506100 |
| H | 5.46927500  | 1.52781100  | -2.80423300 |
| H | 5.91573700  | 0.84712200  | -1.24161600 |
| H | 5.27027000  | -0.19506000 | -2.51771400 |
| C | 3.88245200  | 0.46841200  | 1.54515000  |
| C | 3.15751900  | 1.74005500  | 2.04934900  |
| C | 3.60245700  | -0.62740300 | 2.59735200  |
| C | 5.40142900  | 0.73492300  | 1.49486400  |
| H | 3.31603700  | 2.61173200  | 1.41731900  |
| H | 2.08001700  | 1.57926500  | 2.14706700  |
| H | 3.54995600  | 1.98262100  | 3.04357000  |
| H | 4.17012000  | -1.54304700 | 2.42659800  |
| H | 3.90496100  | -0.24150200 | 3.57713100  |
| H | 2.53842700  | -0.87435500 | 2.65982600  |
| H | 5.74612300  | 0.97124200  | 2.50816900  |
| H | 5.97458500  | -0.12851800 | 1.15153200  |
| H | 5.65729900  | 1.58889900  | 0.86502100  |
| C | 3.54597200  | -1.90890200 | -0.54538400 |
| C | 2.62925000  | -2.82275300 | 0.30394200  |
| C | 3.20748600  | -2.22163700 | -2.01922000 |
| C | 5.02086700  | -2.27885300 | -0.28548900 |
| H | 2.77693400  | -2.71653500 | 1.37719000  |
| H | 1.57270800  | -2.64311800 | 0.08295700  |
| H | 2.85121700  | -3.86475300 | 0.04559200  |
| H | 3.87510100  | -1.73129400 | -2.72836600 |
| H | 3.31616000  | -3.30143500 | -2.17069600 |
| H | 2.17476300  | -1.95854900 | -2.26603600 |
| H | 5.18047100  | -3.31867200 | -0.59347700 |
| H | 5.71635600  | -1.66012000 | -0.85549700 |
| H | 5.29006300  | -2.21343900 | 0.77026900  |
| C | -7.10031300 | 1.37028500  | -2.30929200 |
| H | -7.55754300 | 1.87782300  | -1.46275000 |
| C | -5.87781500 | 0.84498200  | -2.23617500 |
| H | -5.44374200 | 0.34515400  | -3.10135400 |
| C | -3.54665800 | -1.12162500 | -0.87625600 |
| C | -2.39563600 | -0.44850400 | -1.43151200 |
| C | -3.44525500 | -2.52663900 | -0.66661400 |
| C | -1.33534500 | -1.23826300 | -1.97846500 |
| H | -2.49367200 | 0.55779500  | -1.81462300 |



|                                              |                |             |                             |
|----------------------------------------------|----------------|-------------|-----------------------------|
| C                                            | -2.34777300    | -3.23005300 | -1.11827200                 |
| H                                            | -4.25110000    | -3.06885900 | -0.19137500                 |
| C                                            | -1.28578000    | -2.59910300 | -1.81099200                 |
| H                                            | -0.55499900    | -0.71850800 | -2.52498200                 |
| H                                            | -2.32249500    | -4.30615800 | -0.96979200                 |
| H                                            | -0.46944800    | -3.18826900 | -2.21417200                 |
| C                                            | -5.00899900    | 0.89975900  | -1.00431700                 |
| H                                            | -4.09198500    | 1.45452900  | -1.19938700                 |
| H                                            | -5.53298200    | 1.42611700  | -0.20013100                 |
| H                                            | -7.68486000    | 1.32798500  | -3.22288500                 |
| N                                            | -4.67212500    | -0.45270800 | -0.50608000                 |
| C                                            | -5.78867700    | -1.17992100 | 0.10387700                  |
| H                                            | -6.57449900    | -0.46645600 | 0.34859900                  |
| H                                            | -6.21136500    | -1.92885000 | -0.57521900                 |
| H                                            | -5.46587400    | -1.66889900 | 1.02708400                  |
| Zero-point correction=                       |                |             | 0.730521 (Hartree/Particle) |
| Thermal correction to Energy=                |                |             | 0.772572                    |
| Thermal correction to Enthalpy=              |                |             | 0.773516                    |
| Thermal correction to Gibbs Free Energy=     |                |             | 0.656159                    |
| Sum of electronic and zero-point Energies=   |                |             | -1891.302741                |
| Sum of electronic and thermal Energies=      |                |             | -1891.260691                |
| Sum of electronic and thermal Enthalpies=    |                |             | -1891.259746                |
| Sum of electronic and thermal Free Energies= |                |             | -1891.377104                |
| E(RB3LYP) =                                  | -1892.71088992 | A.U.        |                             |

#### C-TS12

|   |            |             |             |
|---|------------|-------------|-------------|
| C | 1.19460100 | -0.14275600 | 0.36352900  |
| C | 1.31469400 | -1.38533000 | 1.20676500  |
| O | 1.10043100 | -1.38521800 | 2.40451800  |
| O | 1.57290100 | -2.52502300 | 0.51643500  |
| C | 1.51511300 | -3.74013400 | 1.29322800  |
| H | 0.50727700 | -3.89178500 | 1.68559000  |
| H | 1.78269500 | -4.53906300 | 0.60273700  |
| H | 2.21821100 | -3.69578100 | 2.12724400  |
| C | 1.73477100 | 1.10819100  | 0.98671300  |
| C | 2.70836600 | 1.08250300  | 2.00530900  |
| C | 1.26301700 | 2.36718800  | 0.56908600  |
| C | 3.16005100 | 2.25893500  | 2.59805400  |
| H | 3.08328300 | 0.13283200  | 2.36975400  |
| C | 1.72102800 | 3.54709800  | 1.15262400  |
| H | 0.52160600 | 2.41579300  | -0.22317300 |
| C | 2.67055300 | 3.49703300  | 2.17425500  |
| H | 3.89296600 | 2.20885100  | 3.39773200  |
| H | 1.33085600 | 4.50266600  | 0.81521100  |

|    |             |             |             |
|----|-------------|-------------|-------------|
| H  | 3.02433700  | 4.41286000  | 2.63800000  |
| P  | -3.32409500 | -0.06526200 | -0.16979000 |
| Au | -0.93450200 | -0.08505200 | -0.00533300 |
| C  | -3.91571000 | 1.76814900  | -0.35952000 |
| C  | -3.09729900 | 2.66495600  | 0.60043600  |
| C  | -3.59450500 | 2.26254500  | -1.78717000 |
| C  | -5.42075400 | 1.97430400  | -0.08915300 |
| H  | -3.27291400 | 2.45398900  | 1.65323700  |
| H  | -2.02281700 | 2.58263300  | 0.41417400  |
| H  | -3.38791600 | 3.70688200  | 0.42343700  |
| H  | -4.21959000 | 1.79976700  | -2.55195400 |
| H  | -3.78635100 | 3.34060900  | -1.82640400 |
| H  | -2.54299000 | 2.10839800  | -2.04782700 |
| H  | -5.67031600 | 3.02264700  | -0.28992000 |
| H  | -6.05549000 | 1.36135500  | -0.73149700 |
| H  | -5.69230500 | 1.77697300  | 0.94947800  |
| C  | -3.85102600 | -1.11840800 | -1.70933500 |
| C  | -2.91142900 | -0.78766900 | -2.89397000 |
| C  | -3.63462000 | -2.61657700 | -1.40190600 |
| C  | -5.31532900 | -0.90205100 | -2.14367300 |
| H  | -2.99584200 | 0.23822800  | -3.24843200 |
| H  | -1.86513900 | -0.97853300 | -2.63686400 |
| H  | -3.17305000 | -1.44445300 | -3.73153200 |
| H  | -4.33465900 | -3.00972700 | -0.66400800 |
| H  | -3.79425700 | -3.18008000 | -2.32792600 |
| H  | -2.61361300 | -2.82187700 | -1.06651200 |
| H  | -5.53714300 | -1.58226800 | -2.97407000 |
| H  | -6.02960400 | -1.11849400 | -1.34708600 |
| H  | -5.49980500 | 0.11173800  | -2.50384300 |
| C  | -4.02155500 | -0.84213300 | 1.46176800  |
| C  | -3.16225300 | -2.07129300 | 1.84831600  |
| C  | -3.86606100 | 0.16517700  | 2.62287100  |
| C  | -5.50262300 | -1.26290100 | 1.36230000  |
| H  | -3.19512700 | -2.87742200 | 1.11716300  |
| H  | -2.11647300 | -1.79601300 | 2.01403100  |
| H  | -3.55063900 | -2.47127800 | 2.79200900  |
| H  | -4.53286900 | 1.02406000  | 2.53734700  |
| H  | -4.12622500 | -0.35050200 | 3.55377600  |
| H  | -2.83640500 | 0.51944400  | 2.72642000  |
| H  | -5.82876700 | -1.62166000 | 2.34525400  |
| H  | -6.15889100 | -0.43617600 | 1.08399200  |
| H  | -5.66201900 | -2.08031800 | 0.65636900  |
| C  | 8.01359700  | -2.33908600 | -0.04885100 |
| H  | 8.62728500  | -1.79591200 | 0.66645700  |

|                                              |                |             |                             |
|----------------------------------------------|----------------|-------------|-----------------------------|
| C                                            | 6.77683500     | -1.94489100 | -0.35152000                 |
| H                                            | 6.18828300     | -2.50722700 | -1.07605200                 |
| C                                            | 4.37299900     | 0.32705400  | -1.19101100                 |
| C                                            | 3.40620900     | -0.65136300 | -0.90393100                 |
| C                                            | 3.93138900     | 1.41190100  | -2.00081700                 |
| C                                            | 2.01865500     | -0.48385500 | -1.24834100                 |
| H                                            | 3.66540200     | -1.55029600 | -0.36070100                 |
| C                                            | 2.62216200     | 1.51017800  | -2.50196400                 |
| H                                            | 4.63293600     | 2.19615200  | -2.26045100                 |
| C                                            | 1.66916500     | 0.58375200  | -2.15446600                 |
| H                                            | 1.49244400     | -1.42243900 | -1.40997700                 |
| H                                            | 2.37648500     | 2.34380000  | -3.15214000                 |
| H                                            | 0.64458900     | 0.66804900  | -2.49977700                 |
| C                                            | 6.11366400     | -0.72800400 | 0.24350400                  |
| H                                            | 5.24778900     | -1.00770100 | 0.85268200                  |
| H                                            | 6.80858400     | -0.22202700 | 0.92308500                  |
| H                                            | 8.45635600     | -3.22434000 | -0.49432400                 |
| N                                            | 5.67484200     | 0.24360400  | -0.76625800                 |
| C                                            | 6.69384900     | 1.13621200  | -1.30489000                 |
| H                                            | 7.67583300     | 0.73097800  | -1.05849200                 |
| H                                            | 6.63290400     | 1.19779500  | -2.39696200                 |
| H                                            | 6.62228200     | 2.15125200  | -0.89035300                 |
| Zero-point correction=                       |                |             | 0.729807 (Hartree/Particle) |
| Thermal correction to Energy=                |                |             | 0.772749                    |
| Thermal correction to Enthalpy=              |                |             | 0.773693                    |
| Thermal correction to Gibbs Free Energy=     |                |             | 0.652556                    |
| Sum of electronic and zero-point Energies=   |                |             | -1891.288422                |
| Sum of electronic and thermal Energies=      |                |             | -1891.245480                |
| Sum of electronic and thermal Enthalpies=    |                |             | -1891.244536                |
| Sum of electronic and thermal Free Energies= |                |             | -1891.365673                |
| E(RB3LYP) =                                  | -1892.69261562 | A.U.        |                             |

C-2

|   |             |            |             |
|---|-------------|------------|-------------|
| C | -1.03462300 | 1.34250100 | -0.51940100 |
| C | -0.81840800 | 1.56626600 | -1.91298900 |
| O | -1.44602400 | 0.87156200 | -2.84716300 |
| O | 0.00854500  | 2.48142500 | -2.37229100 |
| C | 0.25947400  | 2.55988600 | -3.79876600 |
| H | -0.66909700 | 2.74869200 | -4.33875100 |
| H | 0.94802400  | 3.39495800 | -3.91187100 |
| H | 0.71624400  | 1.63257300 | -4.15066500 |
| C | -0.77536300 | 2.43716400 | 0.49874600  |
| C | -0.55454300 | 3.78631600 | 0.17680100  |
| C | -0.81865300 | 2.08470500 | 1.86322500  |

|    |             |             |             |
|----|-------------|-------------|-------------|
| C  | -0.36768200 | 4.73859100  | 1.18138100  |
| H  | -0.53376700 | 4.10722300  | -0.85643800 |
| C  | -0.63290500 | 3.03668500  | 2.86252300  |
| H  | -1.02059800 | 1.05324200  | 2.13697500  |
| C  | -0.40056800 | 4.37229000  | 2.52629400  |
| H  | -0.20481500 | 5.77597800  | 0.90420700  |
| H  | -0.67523900 | 2.73477000  | 3.90492800  |
| H  | -0.25691300 | 5.11749400  | 3.30246300  |
| P  | 2.93522200  | -0.96733300 | 0.22840900  |
| Au | 0.89746600  | 0.14646600  | -0.26174200 |
| C  | 2.79721400  | -2.81192200 | -0.34503100 |
| C  | 1.40235800  | -3.36041800 | 0.03867500  |
| C  | 2.87474000  | -2.88360800 | -1.88610800 |
| C  | 3.88740400  | -3.72585600 | 0.25350500  |
| H  | 1.21499600  | -3.37991200 | 1.11047900  |
| H  | 0.60360300  | -2.78494900 | -0.43716300 |
| H  | 1.33024600  | -4.39186500 | -0.32510200 |
| H  | 3.86528000  | -2.65020700 | -2.27866100 |
| H  | 2.64570500  | -3.91132800 | -2.18891200 |
| H  | 2.13864100  | -2.23110300 | -2.36556100 |
| H  | 3.77893600  | -4.72572600 | -0.18179700 |
| H  | 4.89860200  | -3.38199700 | 0.02877700  |
| H  | 3.79421400  | -3.83748300 | 1.33537200  |
| C  | 4.34661100  | -0.05182200 | -0.73122900 |
| C  | 3.86300600  | 0.27214200  | -2.16534300 |
| C  | 4.62920000  | 1.30806200  | -0.05610900 |
| C  | 5.66187200  | -0.85555700 | -0.80405400 |
| H  | 3.66227900  | -0.61003200 | -2.77077100 |
| H  | 2.96244500  | 0.89344800  | -2.15151100 |
| H  | 4.65283000  | 0.84154500  | -2.66852100 |
| H  | 5.10551300  | 1.20924100  | 0.91983400  |
| H  | 5.32254700  | 1.86520400  | -0.69586400 |
| H  | 3.72386400  | 1.91324400  | 0.04979400  |
| H  | 6.41749900  | -0.23919600 | -1.30421800 |
| H  | 6.05407000  | -1.11253200 | 0.18155500  |
| H  | 5.56333000  | -1.77387500 | -1.38571900 |
| C  | 3.21583800  | -0.85699500 | 2.14202900  |
| C  | 2.85207700  | 0.56451800  | 2.63330800  |
| C  | 2.24347100  | -1.82168800 | 2.85553100  |
| C  | 4.66006900  | -1.18814700 | 2.57430700  |
| H  | 3.50008200  | 1.34372100  | 2.23711700  |
| H  | 1.81811000  | 0.82922200  | 2.39634600  |
| H  | 2.95513300  | 0.57939000  | 3.72434400  |
| H  | 2.48777800  | -2.87272500 | 2.69648400  |

|                                              |                |             |                             |
|----------------------------------------------|----------------|-------------|-----------------------------|
| H                                            | 2.31265700     | -1.63583400 | 3.93289100                  |
| H                                            | 1.20365900     | -1.64908300 | 2.56138400                  |
| H                                            | 4.70532700     | -1.17086500 | 3.66911200                  |
| H                                            | 4.98460100     | -2.17913900 | 2.25212400                  |
| H                                            | 5.38454000     | -0.45437900 | 2.21514700                  |
| C                                            | -9.32607300    | -1.27783500 | 0.11511000                  |
| H                                            | -9.63504000    | -2.03368400 | 0.83401900                  |
| C                                            | -8.08306500    | -0.79688500 | 0.09750400                  |
| H                                            | -7.80056600    | -0.04202200 | -0.63572600                 |
| C                                            | -4.67035300    | -1.03843300 | 0.15107300                  |
| C                                            | -4.62204500    | 0.36326900  | 0.37722600                  |
| C                                            | -3.47326500    | -1.64777700 | -0.29738700                 |
| C                                            | -3.45909800    | 1.08898300  | 0.17977800                  |
| H                                            | -5.51255900    | 0.89868000  | 0.68318800                  |
| C                                            | -2.31109900    | -0.90280300 | -0.48489900                 |
| H                                            | -3.43466100    | -2.71684100 | -0.46500400                 |
| C                                            | -2.26221400    | 0.48391500  | -0.25444200                 |
| H                                            | -3.47835600    | 2.15947800  | 0.36059300                  |
| H                                            | -1.40815400    | -1.42620500 | -0.79290400                 |
| H                                            | -2.10326400    | 0.29479000  | -2.40036100                 |
| C                                            | -6.99289400    | -1.24263000 | 1.04000800                  |
| H                                            | -6.67500400    | -0.42071400 | 1.68860700                  |
| H                                            | -7.37815500    | -2.02161600 | 1.70836500                  |
| H                                            | -10.08538700   | -0.92736500 | -0.57705900                 |
| N                                            | -5.81437900    | -1.77464200 | 0.34636200                  |
| C                                            | -5.89332300    | -3.15904900 | -0.09597800                 |
| H                                            | -6.94172200    | -3.46049200 | -0.11511300                 |
| H                                            | -5.50200600    | -3.27245900 | -1.11235500                 |
| H                                            | -5.34604500    | -3.84467700 | 0.56681800                  |
| Zero-point correction=                       |                |             | 0.732531 (Hartree/Particle) |
| Thermal correction to Energy=                |                |             | 0.775661                    |
| Thermal correction to Enthalpy=              |                |             | 0.776605                    |
| Thermal correction to Gibbs Free Energy=     |                |             | 0.654318                    |
| Sum of electronic and zero-point Energies=   |                |             | -1891.341585                |
| Sum of electronic and thermal Energies=      |                |             | -1891.298455                |
| Sum of electronic and thermal Enthalpies=    |                |             | -1891.297511                |
| Sum of electronic and thermal Free Energies= |                |             | -1891.419798                |
| E(RB3LYP) =                                  | -1892.74319919 | A.U.        |                             |

C-3

|   |            |             |             |
|---|------------|-------------|-------------|
| C | 1.84491300 | -0.43256900 | -0.03806900 |
| C | 2.42788000 | -1.64728100 | -0.24104100 |
| O | 1.74928200 | -2.81578800 | -0.37957900 |
| O | 3.76213800 | -1.80942400 | -0.34635300 |

|                                            |             |             |                             |
|--------------------------------------------|-------------|-------------|-----------------------------|
| C                                          | 4.29362500  | -3.13754200 | -0.30750900                 |
| H                                          | 3.94082700  | -3.73508600 | -1.15190000                 |
| H                                          | 5.37533600  | -3.01252700 | -0.36587000                 |
| H                                          | 4.02974300  | -3.64515600 | 0.62540900                  |
| C                                          | 2.60670600  | 0.83612900  | 0.05373800                  |
| C                                          | 3.80854600  | 1.06737700  | -0.64506800                 |
| C                                          | 2.11043700  | 1.88647600  | 0.85233100                  |
| C                                          | 4.48329400  | 2.28158200  | -0.53508700                 |
| H                                          | 4.21234000  | 0.28934000  | -1.28060900                 |
| C                                          | 2.78513200  | 3.10057000  | 0.95786600                  |
| H                                          | 1.18476300  | 1.74120900  | 1.40004600                  |
| C                                          | 3.97955500  | 3.30741200  | 0.26619200                  |
| H                                          | 5.40644100  | 2.42897900  | -1.08960800                 |
| H                                          | 2.37645000  | 3.88658800  | 1.58744900                  |
| H                                          | 4.50707600  | 4.25344200  | 0.34710300                  |
| C                                          | -6.99136100 | 0.95237000  | -0.95119200                 |
| H                                          | -7.39921200 | 1.33286600  | -0.01720700                 |
| C                                          | -5.68787600 | 0.71484300  | -1.09565800                 |
| H                                          | -5.30464800 | 0.32411600  | -2.03773100                 |
| C                                          | -2.50852400 | -0.29877700 | 0.24482600                  |
| C                                          | -1.79751700 | 0.46730100  | -0.70890200                 |
| C                                          | -1.74762000 | -1.10828800 | 1.10950900                  |
| C                                          | -0.41363300 | 0.42307900  | -0.78360900                 |
| H                                          | -2.33728900 | 1.07414400  | -1.42817000                 |
| C                                          | -0.35423200 | -1.14026800 | 1.02456700                  |
| H                                          | -2.23328600 | -1.69249100 | 1.88199400                  |
| C                                          | 0.35593500  | -0.38709500 | 0.07452100                  |
| H                                          | 0.09343200  | 1.02016300  | -1.53578300                 |
| H                                          | 0.19653300  | -1.74225100 | 1.74364000                  |
| H                                          | 0.80096600  | -2.60770600 | -0.33926000                 |
| C                                          | -4.65701900 | 0.93678600  | -0.01864100                 |
| H                                          | -3.95219300 | 1.71288600  | -0.32816400                 |
| H                                          | -5.15006600 | 1.31513300  | 0.89077500                  |
| H                                          | -7.69780100 | 0.78708800  | -1.75891900                 |
| N                                          | -3.90423700 | -0.28126100 | 0.29307400                  |
| C                                          | -4.60475000 | -1.21460600 | 1.15619900                  |
| H                                          | -5.66357000 | -1.20994800 | 0.88658500                  |
| H                                          | -4.22764200 | -2.23038200 | 1.00891500                  |
| H                                          | -4.52084500 | -0.96488700 | 2.22741100                  |
| Zero-point correction=                     |             |             | 0.358580 (Hartree/Particle) |
| Thermal correction to Energy=              |             |             | 0.380052                    |
| Thermal correction to Enthalpy=            |             |             | 0.380996                    |
| Thermal correction to Gibbs Free Energy=   |             |             | 0.304988                    |
| Sum of electronic and zero-point Energies= |             |             | -941.480906                 |

|                                              |                         |
|----------------------------------------------|-------------------------|
| Sum of electronic and thermal Energies=      | -941.459433             |
| Sum of electronic and thermal Enthalpies=    | -941.458489             |
| Sum of electronic and thermal Free Energies= | -941.534497             |
| E(RB3LYP) =                                  | -942.178178204     A.U. |

C-TS3

|   |             |             |             |
|---|-------------|-------------|-------------|
| C | 1.26531200  | 0.17298400  | -0.29102500 |
| C | 1.85109200  | 1.29689700  | -0.93712400 |
| O | 3.06704400  | 1.48665400  | -1.23883300 |
| O | 0.98179500  | 2.31453400  | -1.20907900 |
| C | 1.54925000  | 3.50939500  | -1.74125700 |
| H | 2.04986400  | 3.32398800  | -2.69553000 |
| H | 0.70934400  | 4.19119700  | -1.88405000 |
| H | 2.27595700  | 3.95299000  | -1.05240300 |
| H | 4.26961400  | 0.99178700  | -0.56969400 |
| O | 2.21365900  | 0.51904600  | 2.28080700  |
| H | 2.16556400  | -0.41470900 | 2.53658300  |
| H | 1.84880400  | 0.51337900  | 1.28749200  |
| O | 4.51036500  | 1.27230400  | 2.26023100  |
| H | 4.52674900  | 2.21901600  | 2.45406200  |
| H | 3.41282700  | 0.90472500  | 2.29771600  |
| O | 5.14876600  | 0.81449800  | -0.04163700 |
| H | 5.83073200  | 1.36234300  | -0.44991900 |
| H | 4.87736200  | 1.09976300  | 1.23210300  |
| C | 1.94470700  | -1.15456200 | -0.31978800 |
| C | 1.52249300  | -2.16575500 | 0.57709100  |
| C | 3.01052300  | -1.48378600 | -1.18307800 |
| C | 2.13349600  | -3.41723900 | 0.61678000  |
| H | 0.67494800  | -1.96901800 | 1.22936000  |
| C | 3.62068900  | -2.73672800 | -1.14015400 |
| H | 3.35602800  | -0.74839300 | -1.89873700 |
| C | 3.19534600  | -3.71416800 | -0.23961900 |
| H | 1.77319000  | -4.16524600 | 1.31874900  |
| H | 4.43548700  | -2.95115800 | -1.82720700 |
| H | 3.67514000  | -4.68794200 | -0.21049500 |
| C | -0.22525800 | 0.17325900  | -0.07873500 |
| C | -0.85654700 | 1.04421000  | 0.81904800  |
| C | -1.06293500 | -0.71901200 | -0.77273600 |
| C | -2.23954200 | 1.05476700  | 1.00061300  |
| H | -0.25507800 | 1.75179300  | 1.38295400  |
| C | -2.43889900 | -0.74022200 | -0.58290200 |
| H | -0.61870600 | -1.42697400 | -1.46644700 |
| C | -3.06833100 | 0.16016100  | 0.30099900  |
| H | -2.66792800 | 1.77216300  | 1.69074600  |

|                                              |                |             |                             |
|----------------------------------------------|----------------|-------------|-----------------------------|
| H                                            | -3.03002900    | -1.48166600 | -1.11155400                 |
| N                                            | -4.46294000    | 0.11181600  | 0.50524800                  |
| C                                            | -5.03225300    | 0.91990200  | 1.56863300                  |
| H                                            | -6.07771200    | 0.63221400  | 1.70456500                  |
| H                                            | -4.50572600    | 0.73602300  | 2.50898500                  |
| H                                            | -5.00144500    | 2.00426200  | 1.36023300                  |
| C                                            | -5.34779200    | -0.02461200 | -0.65650400                 |
| H                                            | -4.75149800    | -0.37393400 | -1.50335500                 |
| H                                            | -5.76021300    | 0.95616100  | -0.95150200                 |
| C                                            | -6.47516800    | -0.99138500 | -0.40321100                 |
| H                                            | -6.17044200    | -1.98750900 | -0.08364800                 |
| C                                            | -7.76833400    | -0.70018400 | -0.54240800                 |
| H                                            | -8.54516000    | -1.43827600 | -0.36670800                 |
| H                                            | -8.09720900    | 0.29048900  | -0.84868900                 |
| Zero-point correction=                       |                |             | 0.433914 (Hartree/Particle) |
| Thermal correction to Energy=                |                |             | 0.463278                    |
| Thermal correction to Enthalpy=              |                |             | 0.464222                    |
| Thermal correction to Gibbs Free Energy=     |                |             | 0.371399                    |
| Sum of electronic and zero-point Energies=   |                |             | -1170.724076                |
| Sum of electronic and thermal Energies=      |                |             | -1170.694711                |
| Sum of electronic and thermal Enthalpies=    |                |             | -1170.693767                |
| Sum of electronic and thermal Free Energies= |                |             | -1170.786591                |
| E(RB3LYP) =                                  | -1171.58789833 | A.U.        |                             |

#### C-TS31

|   |            |             |             |
|---|------------|-------------|-------------|
| C | 1.88512800 | -0.41578500 | 0.42239000  |
| C | 2.51864000 | -1.66118200 | 0.03246200  |
| O | 3.44996300 | -1.99038400 | 0.86477000  |
| O | 2.16586200 | -2.44710300 | -0.95697400 |
| C | 2.76811100 | -3.76133400 | -1.01399300 |
| H | 2.76955800 | -4.21775000 | -0.02252700 |
| H | 2.15704400 | -4.33329300 | -1.71115200 |
| H | 3.79348100 | -3.68252700 | -1.38026500 |
| C | 2.69393500 | 0.82336300  | 0.18778400  |
| C | 3.73213900 | 0.88671000  | -0.75898700 |
| C | 2.42954100 | 1.98347200  | 0.94339500  |
| C | 4.49172600 | 2.04564200  | -0.92367700 |
| H | 3.94291800 | 0.02221800  | -1.38310600 |
| C | 3.17080100 | 3.14679100  | 0.75970600  |
| H | 1.63452700 | 1.95951200  | 1.68285400  |
| C | 4.21424100 | 3.18521000  | -0.17003600 |
| H | 5.29063200 | 2.06044800  | -1.66026400 |
| H | 2.94223800 | 4.02572400  | 1.35662200  |
| H | 4.79731400 | 4.09113400  | -0.30589300 |



|                                              |                |             |                             |
|----------------------------------------------|----------------|-------------|-----------------------------|
| C                                            | -6.91152200    | 1.35923800  | -0.73722800                 |
| H                                            | -7.32973200    | 1.44666700  | 0.26323900                  |
| C                                            | -5.61199200    | 1.13592700  | -0.93152200                 |
| H                                            | -5.21892000    | 1.04124700  | -1.94327000                 |
| C                                            | -2.46672600    | -0.29542600 | 0.19785500                  |
| C                                            | -1.67769800    | 0.70432400  | -0.40959300                 |
| C                                            | -1.78472700    | -1.32691400 | 0.87256700                  |
| C                                            | -0.29118200    | 0.67681500  | -0.33398100                 |
| H                                            | -2.15162500    | 1.49268600  | -0.98565800                 |
| C                                            | -0.39420700    | -1.33912800 | 0.94238700                  |
| H                                            | -2.33825400    | -2.11028700 | 1.37671800                  |
| C                                            | 0.39613000     | -0.34627300 | 0.34314500                  |
| H                                            | 0.27467600     | 1.45921300  | -0.82946400                 |
| H                                            | 0.09041500     | -2.13696000 | 1.50136300                  |
| H                                            | 2.88428500     | -1.04557100 | 1.43534000                  |
| C                                            | -4.59585600    | 0.98922000  | 0.17142300                  |
| H                                            | -3.87365100    | 1.80793200  | 0.11929600                  |
| H                                            | -5.09660800    | 1.08114800  | 1.14982400                  |
| H                                            | -7.60412600    | 1.47360400  | -1.56558200                 |
| N                                            | -3.86566900    | -0.27933200 | 0.08954900                  |
| C                                            | -4.62141000    | -1.42295100 | 0.56733100                  |
| H                                            | -5.65389800    | -1.32708100 | 0.22272400                  |
| H                                            | -4.21348300    | -2.34917400 | 0.15368600                  |
| H                                            | -4.63413100    | -1.50998500 | 1.66773800                  |
| Zero-point correction=                       |                |             | 0.352736 (Hartree/Particle) |
| Thermal correction to Energy=                |                |             | 0.373993                    |
| Thermal correction to Enthalpy=              |                |             | 0.374937                    |
| Thermal correction to Gibbs Free Energy=     |                |             | 0.299326                    |
| Sum of electronic and zero-point Energies=   |                |             | -941.410747                 |
| Sum of electronic and thermal Energies=      |                |             | -941.389490                 |
| Sum of electronic and thermal Enthalpies=    |                |             | -941.388546                 |
| Sum of electronic and thermal Free Energies= |                |             | -941.464157                 |
| E(RB3LYP) =                                  | -942.102675179 | A.U.        |                             |

#### C-TS21

|   |             |            |             |
|---|-------------|------------|-------------|
| C | -0.86143000 | 1.77974900 | -0.66100900 |
| C | -0.19689400 | 2.05663600 | -1.99940600 |
| O | 0.78094800  | 2.76239300 | -2.14247200 |
| O | -0.84001500 | 1.45706100 | -3.02899100 |
| C | -0.27840400 | 1.69797900 | -4.33760500 |
| H | 0.72649500  | 1.27525300 | -4.40495100 |
| H | -0.95142500 | 1.20158900 | -5.03533100 |
| H | -0.23102000 | 2.76917100 | -4.54043500 |
| C | -0.69699400 | 2.84141800 | 0.41178800  |

|    |             |             |             |
|----|-------------|-------------|-------------|
| C  | -0.66326200 | 4.20286900  | 0.07480900  |
| C  | -0.59637600 | 2.48932900  | 1.76904800  |
| C  | -0.51114400 | 5.17816000  | 1.06064500  |
| H  | -0.73070600 | 4.50558000  | -0.96450700 |
| C  | -0.45588500 | 3.46458600  | 2.75587900  |
| H  | -0.65187600 | 1.44212400  | 2.05651900  |
| C  | -0.40755800 | 4.81491300  | 2.40385200  |
| H  | -0.47956900 | 6.22518300  | 0.77522000  |
| H  | -0.38431700 | 3.16862500  | 3.79825500  |
| H  | -0.29454700 | 5.57610600  | 3.16950900  |
| P  | 2.66571000  | -1.15113200 | 0.30248800  |
| Au | 0.85397900  | 0.26992100  | -0.12555700 |
| C  | 2.10073400  | -2.95904700 | -0.08570700 |
| C  | 0.68661200  | -3.19493900 | 0.49796100  |
| C  | 1.97068200  | -3.14168000 | -1.61369500 |
| C  | 3.06688300  | -4.02674700 | 0.46957600  |
| H  | 0.64168000  | -3.12291100 | 1.58297700  |
| H  | -0.04637700 | -2.49980100 | 0.07839600  |
| H  | 0.37504900  | -4.21013600 | 0.22632400  |
| H  | 2.92949600  | -3.13233400 | -2.13359200 |
| H  | 1.51539200  | -4.12066100 | -1.79957900 |
| H  | 1.31751700  | -2.38630700 | -2.06064900 |
| H  | 2.71485900  | -5.01331200 | 0.14788200  |
| H  | 4.08659200  | -3.90869700 | 0.09911100  |
| H  | 3.09484400  | -4.03769400 | 1.56060300  |
| C  | 4.09943000  | -0.59377500 | -0.87587000 |
| C  | 3.51906000  | -0.25640800 | -2.27039000 |
| C  | 4.72844700  | 0.71404100  | -0.34821300 |
| C  | 5.20488100  | -1.66125400 | -1.02096600 |
| H  | 3.02510500  | -1.09626100 | -2.75578700 |
| H  | 2.81792300  | 0.58159500  | -2.22127600 |
| H  | 4.35134700  | 0.05000500  | -2.91418800 |
| H  | 5.29377900  | 0.57749500  | 0.57446100  |
| H  | 5.43321200  | 1.07498300  | -1.10522700 |
| H  | 3.98289800  | 1.50033200  | -0.20027600 |
| H  | 6.01101600  | -1.24141700 | -1.63267600 |
| H  | 5.64186900  | -1.95144100 | -0.06378200 |
| H  | 4.85570700  | -2.56270500 | -1.52813500 |
| C  | 3.17540000  | -0.95958200 | 2.16050900  |
| C  | 3.14733600  | 0.53862400  | 2.54858700  |
| C  | 2.13297900  | -1.66006500 | 3.05930700  |
| C  | 4.57325600  | -1.53822800 | 2.46885600  |
| H  | 3.87293000  | 1.14478400  | 2.01024300  |
| H  | 2.15843600  | 0.98106400  | 2.40118300  |

|                                              |                |             |                             |
|----------------------------------------------|----------------|-------------|-----------------------------|
| H                                            | 3.38799900     | 0.61288800  | 3.61520600                  |
| H                                            | 2.16028600     | -2.74781200 | 2.98153700                  |
| H                                            | 2.36216700     | -1.40744600 | 4.10034000                  |
| H                                            | 1.11465600     | -1.31496400 | 2.85662800                  |
| H                                            | 4.75698800     | -1.43697300 | 3.54446900                  |
| H                                            | 4.66094900     | -2.59849800 | 2.22423600                  |
| H                                            | 5.37240600     | -0.99919800 | 1.95718000                  |
| C                                            | -8.80151900    | -1.60732600 | 0.89441100                  |
| H                                            | -8.95955700    | -2.60642800 | 1.29475800                  |
| C                                            | -7.58196100    | -1.08016400 | 0.78868900                  |
| H                                            | -7.45378600    | -0.07782000 | 0.38163300                  |
| C                                            | -4.32757800    | -1.04310400 | -0.09721100                 |
| C                                            | -4.18611700    | 0.14194500  | 0.67091600                  |
| C                                            | -3.34266800    | -1.27136000 | -1.10121300                 |
| C                                            | -3.13513800    | 1.01908300  | 0.46340600                  |
| H                                            | -4.92424900    | 0.40696500  | 1.41682600                  |
| C                                            | -2.29453700    | -0.39616000 | -1.30814400                 |
| H                                            | -3.39438200    | -2.15918100 | -1.71860500                 |
| C                                            | -2.15097200    | 0.76227900  | -0.51346400                 |
| H                                            | -3.08397300    | 1.92147800  | 1.06085000                  |
| H                                            | -1.57378500    | -0.61002700 | -2.08638000                 |
| H                                            | -1.97944400    | 1.94014800  | -1.13169700                 |
| C                                            | -6.31807100    | -1.79713700 | 1.19352700                  |
| H                                            | -5.82515500    | -1.28947000 | 2.02805300                  |
| H                                            | -6.55975400    | -2.80361800 | 1.55157400                  |
| H                                            | -9.68920600    | -1.05760100 | 0.59758500                  |
| N                                            | -5.35293700    | -1.92879700 | 0.09313800                  |
| C                                            | -5.59048800    | -3.01143700 | -0.85553200                 |
| H                                            | -6.57976900    | -3.42919800 | -0.66738300                 |
| H                                            | -5.57854300    | -2.64778300 | -1.88827100                 |
| H                                            | -4.84928900    | -3.81568100 | -0.75742600                 |
| Zero-point correction=                       |                |             | 0.727083 (Hartree/Particle) |
| Thermal correction to Energy=                |                |             | 0.770350                    |
| Thermal correction to Enthalpy=              |                |             | 0.771295                    |
| Thermal correction to Gibbs Free Energy=     |                |             | 0.648954                    |
| Sum of electronic and zero-point Energies=   |                |             | -1891.272671                |
| Sum of electronic and thermal Energies=      |                |             | -1891.229404                |
| Sum of electronic and thermal Enthalpies=    |                |             | -1891.228459                |
| Sum of electronic and thermal Free Energies= |                |             | -1891.350800                |
| E(RB3LYP) =                                  | -1892.67270763 | A.U.        |                             |
| C-TSb1                                       |                |             |                             |
| 1 1                                          |                |             |                             |
| C                                            | 0.85288000     | 0.44587400  | -0.57076200                 |

|    |             |             |             |
|----|-------------|-------------|-------------|
| C  | 1.21508100  | -0.36615400 | -1.77965500 |
| O  | 1.15831300  | 0.13177000  | -2.88890400 |
| O  | 1.45749600  | -1.66959800 | -1.55908800 |
| C  | 1.64887100  | -2.47023000 | -2.74970800 |
| H  | 2.48144200  | -2.08297800 | -3.33984600 |
| H  | 1.86584000  | -3.47421400 | -2.38854900 |
| H  | 0.74271600  | -2.46402200 | -3.35880700 |
| C  | 1.42219200  | 1.78085100  | -0.43754400 |
| C  | 2.50086500  | 2.23413400  | -1.23987300 |
| C  | 0.87808000  | 2.68263900  | 0.50850900  |
| C  | 2.98647800  | 3.53063000  | -1.11303700 |
| H  | 2.92242800  | 1.57799400  | -1.99226200 |
| C  | 1.38063400  | 3.97023000  | 0.64811800  |
| H  | 0.05063600  | 2.35280100  | 1.12970800  |
| C  | 2.43390600  | 4.39991000  | -0.16650100 |
| H  | 3.79742900  | 3.86671600  | -1.75128000 |
| H  | 0.94822600  | 4.64529400  | 1.37982000  |
| H  | 2.82010100  | 5.40973100  | -0.06694000 |
| C  | 1.57342800  | -0.80743900 | 1.21107200  |
| H  | 1.01501900  | -1.67898000 | 0.89406100  |
| C  | 2.88565900  | -0.66186700 | 0.86784700  |
| H  | 3.31754100  | -1.34204600 | 0.13821300  |
| C  | 6.04988400  | -0.59375900 | 0.87326600  |
| C  | 7.14251500  | -1.42754100 | 1.19937800  |
| C  | 5.99314700  | -0.06938300 | -0.43773200 |
| C  | 8.13812100  | -1.69565900 | 0.26397000  |
| H  | 7.22507800  | -1.86444200 | 2.18644400  |
| C  | 6.99820800  | -0.34943700 | -1.36177100 |
| H  | 5.17307800  | 0.56647600  | -0.74852600 |
| C  | 8.07990600  | -1.16168600 | -1.02418500 |
| H  | 8.96835800  | -2.33438100 | 0.55095100  |
| H  | 6.92740800  | 0.07495700  | -2.35934200 |
| H  | 8.85824300  | -1.37694700 | -1.74861300 |
| C  | 3.82744000  | 0.35182600  | 1.44593800  |
| H  | 4.02147100  | 1.15959700  | 0.72898200  |
| H  | 3.39001200  | 0.83221500  | 2.32589600  |
| H  | 1.14097700  | -0.20951700 | 2.00737700  |
| Au | -1.17752000 | 0.08830100  | -0.10360100 |
| P  | -3.52455900 | -0.29565500 | 0.20367700  |
| C  | -4.46608300 | 0.63587600  | -1.20913200 |
| C  | -3.82269100 | -2.20576900 | 0.08849700  |
| C  | -4.04944200 | 0.37745200  | 1.94006100  |
| C  | -3.83044300 | 2.03455700  | -1.40046600 |
| H  | -4.33920000 | 2.52711900  | -2.23679100 |

|                                            |             |             |                             |
|--------------------------------------------|-------------|-------------|-----------------------------|
| H                                          | -3.93019600 | 2.68411900  | -0.53290200                 |
| H                                          | -2.76921800 | 1.96339100  | -1.65653100                 |
| C                                          | -4.26558800 | -0.10975400 | -2.54738400                 |
| H                                          | -4.78649300 | -1.06716100 | -2.58913000                 |
| H                                          | -4.68054000 | 0.51486100  | -3.34605900                 |
| H                                          | -3.20770500 | -0.26780700 | -2.77714300                 |
| C                                          | -5.97852000 | 0.79046100  | -0.94632900                 |
| H                                          | -6.19290100 | 1.42836200  | -0.08692600                 |
| H                                          | -6.43552100 | 1.26813100  | -1.82037300                 |
| H                                          | -6.48251300 | -0.16657000 | -0.79904300                 |
| C                                          | -2.97108200 | -2.78014000 | -1.07000400                 |
| H                                          | -3.10987200 | -3.86724500 | -1.08666700                 |
| H                                          | -3.25414300 | -2.40154500 | -2.05014300                 |
| H                                          | -1.90448900 | -2.58425400 | -0.92255600                 |
| C                                          | -3.30995300 | -2.89017100 | 1.37493600                  |
| H                                          | -3.92241400 | -2.67515300 | 2.25158700                  |
| H                                          | -3.34483000 | -3.97401900 | 1.21910500                  |
| C                                          | -5.30104200 | -2.59241600 | -0.12677300                 |
| H                                          | -5.68797700 | -2.25108000 | -1.08861700                 |
| H                                          | -5.37932200 | -3.68562400 | -0.12049600                 |
| H                                          | -5.95712100 | -2.21618200 | 0.66058700                  |
| C                                          | -4.09108500 | 1.92126700  | 1.90940600                  |
| H                                          | -4.91006400 | 2.31744700  | 1.30811400                  |
| H                                          | -4.24508700 | 2.27602400  | 2.93454200                  |
| H                                          | -3.15058300 | 2.35200200  | 1.55278100                  |
| C                                          | -2.96274800 | 0.00002400  | 2.97595200                  |
| H                                          | -2.84346200 | -1.07243600 | 3.11732100                  |
| H                                          | -1.98883200 | 0.41944900  | 2.70487100                  |
| H                                          | -3.24941700 | 0.42765100  | 3.94352700                  |
| C                                          | -5.41809500 | -0.14809700 | 2.42073700                  |
| H                                          | -5.41804300 | -1.22674000 | 2.58683100                  |
| H                                          | -5.65584400 | 0.32501600  | 3.38024200                  |
| H                                          | -6.22825600 | 0.09249300  | 1.72993500                  |
| H                                          | -2.27085700 | -2.62684200 | 1.59489200                  |
| N                                          | 5.07512500  | -0.29264500 | 1.83353200                  |
| C                                          | 5.09631800  | -0.97920800 | 3.12042800                  |
| H                                          | 4.26398300  | -0.62067800 | 3.72830700                  |
| H                                          | 5.01201100  | -2.07096800 | 3.02912100                  |
| H                                          | 6.02196700  | -0.75191300 | 3.65932200                  |
| Zero-point correction=                     |             |             | 0.730046 (Hartree/Particle) |
| Thermal correction to Energy=              |             |             | 0.773004                    |
| Thermal correction to Enthalpy=            |             |             | 0.773948                    |
| Thermal correction to Gibbs Free Energy=   |             |             | 0.650959                    |
| Sum of electronic and zero-point Energies= |             |             | -1891.296518                |

Sum of electronic and thermal Energies= -1891.253560  
 Sum of electronic and thermal Enthalpies= -1891.252616  
 Sum of electronic and thermal Free Energies= -1891.375605  
 E(RB3LYP) = -1892.70236777 A.U.

C-TSa1

1 1

|    |             |             |             |
|----|-------------|-------------|-------------|
| C  | 1.13987800  | -0.21634700 | 1.04968900  |
| C  | 1.52313200  | -1.61440900 | 1.41693700  |
| O  | 1.78575000  | -1.92396500 | 2.56432800  |
| O  | 1.42325100  | -2.49700200 | 0.41041900  |
| C  | 1.70861700  | -3.86993000 | 0.76864600  |
| H  | 1.01785900  | -4.20930100 | 1.54258600  |
| H  | 1.57338300  | -4.44151700 | -0.14842400 |
| H  | 2.73346700  | -3.96118800 | 1.13343100  |
| C  | 1.95679300  | 0.84715000  | 1.51455300  |
| C  | 3.24025300  | 0.63194300  | 2.10815300  |
| C  | 1.48633100  | 2.19427700  | 1.42558900  |
| C  | 3.96801500  | 1.69469200  | 2.62521200  |
| H  | 3.62515700  | -0.37505000 | 2.19542500  |
| C  | 2.22462300  | 3.24714200  | 1.93410600  |
| H  | 0.51882700  | 2.37219700  | 0.96834900  |
| C  | 3.46411800  | 2.99655500  | 2.54593200  |
| H  | 4.93004200  | 1.51203300  | 3.09228200  |
| H  | 1.84393200  | 4.26157800  | 1.87422600  |
| H  | 4.03531500  | 3.82205500  | 2.96056900  |
| P  | -3.16163700 | 0.04470100  | -0.19443500 |
| Au | -0.81231600 | -0.05673100 | 0.39022400  |
| C  | -4.13875500 | -0.90963700 | 1.17985200  |
| C  | -3.36478800 | -2.20083000 | 1.54167300  |
| C  | -4.17757700 | -0.06081600 | 2.46987400  |
| C  | -5.58306700 | -1.27517000 | 0.77896200  |
| H  | -3.27946100 | -2.90673000 | 0.71759300  |
| H  | -2.35868300 | -1.97632000 | 1.90849300  |
| H  | -3.90483700 | -2.70656400 | 2.35023300  |
| H  | -4.81252800 | 0.82179900  | 2.38401300  |
| H  | -4.59711600 | -0.68007500 | 3.27026900  |
| H  | -3.17791600 | 0.24830000  | 2.78936400  |
| H  | -6.07423200 | -1.74355300 | 1.63954000  |
| H  | -6.17915100 | -0.40439400 | 0.50022400  |
| H  | -5.62367800 | -1.99532500 | -0.04051200 |
| C  | -3.71096900 | 1.90014400  | -0.25880200 |
| C  | -3.07108900 | 2.65551000  | 0.93102500  |
| C  | -3.14577000 | 2.55997000  | -1.53582100 |

|   |             |             |             |
|---|-------------|-------------|-------------|
| C | -5.24016500 | 2.10360400  | -0.22638300 |
| H | -3.41942200 | 2.31856700  | 1.90535400  |
| H | -1.98023100 | 2.57579300  | 0.91434400  |
| H | -3.32886900 | 3.71684900  | 0.84077200  |
| H | -3.62093100 | 2.20285600  | -2.45022700 |
| H | -3.33646800 | 3.63722500  | -1.47611500 |
| H | -2.06316600 | 2.42513900  | -1.62321000 |
| H | -5.45173400 | 3.17463300  | -0.32430700 |
| H | -5.75340600 | 1.59604600  | -1.04528100 |
| H | -5.68721900 | 1.77578300  | 0.71409900  |
| C | -3.41520300 | -0.79946600 | -1.91892300 |
| C | -2.27621900 | -0.35013100 | -2.86479000 |
| C | -3.26276500 | -2.32960400 | -1.77165200 |
| C | -4.77760000 | -0.49234800 | -2.57348400 |
| H | -2.28107300 | 0.71568500  | -3.08547500 |
| H | -1.29715100 | -0.61229700 | -2.45289400 |
| H | -2.39032700 | -0.88167500 | -3.81651000 |
| H | -4.08759000 | -2.79391900 | -1.23013000 |
| H | -3.25199200 | -2.76829600 | -2.77566000 |
| H | -2.32116300 | -2.60299900 | -1.28588300 |
| H | -4.85238000 | -1.06210400 | -3.50676400 |
| H | -5.62277100 | -0.78280500 | -1.94680200 |
| H | -4.88976000 | 0.56182200  | -2.83307600 |
| C | 3.78226100  | 2.94355200  | -3.15893200 |
| H | 3.89359400  | 3.58172400  | -2.28469600 |
| C | 3.10970400  | 1.79459100  | -3.10922300 |
| H | 3.01918800  | 1.18340600  | -4.00640600 |
| C | 3.95859000  | -0.51271400 | -1.13369500 |
| C | 4.36249200  | -1.86825400 | -1.15285000 |
| C | 4.87760400  | 0.43953700  | -0.63681800 |
| C | 5.61893200  | -2.24404500 | -0.69006800 |
| H | 3.70133800  | -2.63127700 | -1.54149800 |
| C | 6.13729200  | 0.04628800  | -0.18451300 |
| H | 4.63489000  | 1.49274600  | -0.64129300 |
| C | 6.51942200  | -1.29311100 | -0.20041700 |
| H | 5.90213100  | -3.29194400 | -0.72537500 |
| H | 6.82683700  | 0.80526500  | 0.17329900  |
| H | 7.50234100  | -1.59237900 | 0.14811000  |
| C | 2.40661100  | 1.27474300  | -1.87708900 |
| H | 2.65274600  | 1.89404700  | -1.01042800 |
| H | 1.32085600  | 1.35304000  | -2.00510700 |
| H | 4.24194700  | 3.29634500  | -4.07673900 |
| N | 2.67271700  | -0.14084200 | -1.56343000 |
| C | 1.95135600  | -1.08942400 | -2.41985300 |

|                                              |                |             |                             |
|----------------------------------------------|----------------|-------------|-----------------------------|
| H                                            | 1.69439800     | -1.98784400 | -1.85997500                 |
| H                                            | 1.02265000     | -0.62369600 | -2.75015200                 |
| H                                            | 2.53652300     | -1.36958500 | -3.30611700                 |
| Zero-point correction=                       |                |             | 0.731287 (Hartree/Particle) |
| Thermal correction to Energy=                |                |             | 0.773639                    |
| Thermal correction to Enthalpy=              |                |             | 0.774583                    |
| Thermal correction to Gibbs Free Energy=     |                |             | 0.655696                    |
| Sum of electronic and zero-point Energies=   |                |             | -1891.297113                |
| Sum of electronic and thermal Energies=      |                |             | -1891.254762                |
| Sum of electronic and thermal Enthalpies=    |                |             | -1891.253818                |
| Sum of electronic and thermal Free Energies= |                |             | -1891.372705                |
| E(RB3LYP) =                                  | -1892.71557907 | A.U         |                             |

C-1a

1 1

|    |             |             |             |
|----|-------------|-------------|-------------|
| C  | -1.51548700 | -0.17430900 | -0.31193800 |
| C  | -1.63832700 | -1.21676600 | -1.42231900 |
| O  | -0.85415900 | -1.24061700 | -2.35083900 |
| O  | -2.68308800 | -2.06540600 | -1.34309100 |
| C  | -2.79986900 | -3.02132500 | -2.42403700 |
| H  | -1.91793700 | -3.66398000 | -2.46141200 |
| H  | -3.69429100 | -3.60039300 | -2.19881100 |
| H  | -2.90380700 | -2.50074000 | -3.37734200 |
| C  | -1.97253700 | 1.15849100  | -0.89426400 |
| C  | -2.93429600 | 1.20780600  | -1.92313000 |
| C  | -1.40187500 | 2.37470300  | -0.48403200 |
| C  | -3.30822900 | 2.41549400  | -2.50953000 |
| H  | -3.40733800 | 0.29363600  | -2.26632200 |
| C  | -1.78502500 | 3.58787700  | -1.05509000 |
| H  | -0.63714000 | 2.36852600  | 0.28392600  |
| C  | -2.73902100 | 3.61293500  | -2.07338000 |
| H  | -4.04573000 | 2.41953500  | -3.30630200 |
| H  | -1.32487800 | 4.51109800  | -0.71590200 |
| H  | -3.02811500 | 4.55486200  | -2.52937500 |
| P  | 3.04689200  | -0.08304900 | 0.09752300  |
| Au | 0.65162000  | -0.11390600 | 0.02189200  |
| C  | 3.67299400  | -1.58433600 | 1.15004400  |
| C  | 2.80874700  | -1.70251600 | 2.42784700  |
| C  | 3.45096000  | -2.89483800 | 0.36272500  |
| C  | 5.15985800  | -1.49217100 | 1.55122400  |
| H  | 2.90023200  | -0.85250700 | 3.10149600  |
| H  | 1.75098400  | -1.82929700 | 2.18035600  |
| H  | 3.13118500  | -2.59292500 | 2.97977200  |
| H  | 4.11428200  | -2.99509200 | -0.49689900 |



|   |             |             |             |
|---|-------------|-------------|-------------|
| H | 3.66475800  | -3.73477700 | 1.03324100  |
| H | 2.41640500  | -3.00055300 | 0.02259400  |
| H | 5.43681000  | -2.41225200 | 2.07872400  |
| H | 5.82552500  | -1.39885200 | 0.69135700  |
| H | 5.35986800  | -0.66250200 | 2.23163600  |
| C | 3.65305200  | -0.24060800 | -1.73786300 |
| C | 2.79300000  | -1.30221700 | -2.46654600 |
| C | 3.40126700  | 1.09242100  | -2.47732800 |
| C | 5.14439900  | -0.61272600 | -1.87335500 |
| H | 2.91369400  | -2.30767300 | -2.06746100 |
| H | 1.72866500  | -1.05295200 | -2.45484600 |
| H | 3.11382900  | -1.33047900 | -3.51434500 |
| H | 4.05647100  | 1.89958500  | -2.14592000 |
| H | 3.60614000  | 0.93103700  | -3.54133300 |
| H | 2.36021700  | 1.41849100  | -2.39468900 |
| H | 5.40402800  | -0.61889700 | -2.93820200 |
| H | 5.80920700  | 0.10075100  | -1.38242800 |
| H | 5.36526200  | -1.61005500 | -1.48750900 |
| C | 3.65533900  | 1.58275900  | 0.87495700  |
| C | 2.77751700  | 2.73647600  | 0.33479200  |
| C | 3.42973500  | 1.55867700  | 2.40292700  |
| C | 5.13925400  | 1.90258700  | 0.59647800  |
| H | 2.85362800  | 2.88079800  | -0.74087100 |
| H | 1.72387900  | 2.58122000  | 0.58188800  |
| H | 3.10080900  | 3.66707800  | 0.81546600  |
| H | 4.09789600  | 0.87374200  | 2.92646300  |
| H | 3.63268300  | 2.56276900  | 2.79191300  |
| H | 2.39538700  | 1.31067300  | 2.66039800  |
| H | 5.39952700  | 2.83034100  | 1.11920100  |
| H | 5.81614800  | 1.12613900  | 0.95761700  |
| H | 5.34000700  | 2.06693400  | -0.46367800 |
| C | -2.18102700 | 2.70423300  | 2.79962500  |
| H | -1.12667100 | 2.88193900  | 2.60670300  |
| C | -2.75015800 | 1.51463900  | 2.60033600  |
| H | -3.79819800 | 1.37461900  | 2.84464100  |
| C | -3.84325300 | -0.70980100 | 0.89834500  |
| C | -4.52097900 | -1.92023100 | 1.08299300  |
| C | -4.57339800 | 0.44424400  | 0.59222500  |
| C | -5.91015000 | -1.97015500 | 0.96354300  |
| H | -3.99894000 | -2.83929500 | 1.30558200  |
| C | -5.96272700 | 0.38157800  | 0.47155300  |
| H | -4.07949500 | 1.39305500  | 0.45438000  |
| C | -6.63876400 | -0.82252000 | 0.65624100  |
| H | -6.41722500 | -2.91813700 | 1.11262700  |

|                                              |                |             |                             |
|----------------------------------------------|----------------|-------------|-----------------------------|
| H                                            | -6.51067000    | 1.28802300  | 0.23470600                  |
| H                                            | -7.71928700    | -0.86618600 | 0.56521200                  |
| C                                            | -1.95935300    | 0.28786800  | 2.26012200                  |
| H                                            | -0.90579800    | 0.52300200  | 2.09839600                  |
| H                                            | -2.03483500    | -0.38820500 | 3.11636500                  |
| H                                            | -2.75271200    | 3.54409700  | 3.18122900                  |
| N                                            | -2.34477000    | -0.62451700 | 1.04414200                  |
| C                                            | -1.75903300    | -1.95994800 | 1.44709000                  |
| H                                            | -1.91110200    | -2.68604900 | 0.65626200                  |
| H                                            | -0.69451500    | -1.80885300 | 1.61311400                  |
| H                                            | -2.23455100    | -2.29709500 | 2.36695500                  |
| Zero-point correction=                       |                |             | 0.733807 (Hartree/Particle) |
| Thermal correction to Energy=                |                |             | 0.775891                    |
| Thermal correction to Enthalpy=              |                |             | 0.776836                    |
| Thermal correction to Gibbs Free Energy=     |                |             | 0.659316                    |
| Sum of electronic and zero-point Energies=   |                |             | -1891.300429                |
| Sum of electronic and thermal Energies=      |                |             | -1891.258345                |
| Sum of electronic and thermal Enthalpies=    |                |             | -1891.257401                |
| Sum of electronic and thermal Free Energies= |                |             | -1891.374921                |
| E(RB3LYP) =                                  | -1892.71827238 | A.U.        |                             |

#### C-PI

|   |             |             |             |
|---|-------------|-------------|-------------|
| C | 1.94846800  | 0.55706300  | -0.76643000 |
| C | 2.44271400  | 1.84616600  | -0.10095700 |
| O | 3.12281800  | 2.68099300  | -0.65614800 |
| O | 2.02575700  | 1.96609900  | 1.18056100  |
| C | 2.44582100  | 3.16707800  | 1.85060400  |
| H | 2.06872500  | 4.04811200  | 1.32634200  |
| H | 2.02252300  | 3.10745700  | 2.85297000  |
| H | 3.53620100  | 3.22346100  | 1.89492800  |
| C | 2.75269200  | -0.67292700 | -0.34275800 |
| C | 3.18938600  | -0.89127800 | 0.97079100  |
| C | 3.05019500  | -1.63962100 | -1.31391400 |
| C | 3.90097300  | -2.04702500 | 1.30097100  |
| H | 2.97604900  | -0.15397200 | 1.73663600  |
| C | 3.75843500  | -2.79389600 | -0.98516400 |
| H | 2.72053400  | -1.48408100 | -2.33790700 |
| C | 4.18776400  | -3.00225600 | 0.32686000  |
| H | 4.23357300  | -2.19638000 | 2.32436300  |
| H | 3.97934500  | -3.52788700 | -1.75488200 |
| H | 4.74353400  | -3.89886700 | 0.58518200  |
| C | -6.69514200 | -1.14906000 | 1.30126500  |
| H | -7.13174000 | -1.69682900 | 0.46894100  |
| C | -5.40930200 | -0.79844500 | 1.30551000  |

|                                              |                |             |                             |
|----------------------------------------------|----------------|-------------|-----------------------------|
| H                                            | -4.99778200    | -0.24021700 | 2.14579600                  |
| C                                            | -2.40749900    | 0.17809100  | -0.45505500                 |
| C                                            | -1.55780200    | -0.39907400 | 0.51416400                  |
| C                                            | -1.79246700    | 0.87499100  | -1.51391900                 |
| C                                            | -0.17587700    | -0.29754800 | 0.41626800                  |
| H                                            | -1.98128200    | -0.90943300 | 1.37264000                  |
| C                                            | -0.40492900    | 0.97745700  | -1.59180300                 |
| H                                            | -2.39170800    | 1.32339200  | -2.29706200                 |
| C                                            | 0.43327100     | 0.39385000  | -0.63790500                 |
| H                                            | 0.43758400     | -0.76192100 | 1.18137600                  |
| H                                            | 0.03148200     | 1.51859600  | -2.42852400                 |
| H                                            | 2.16993600     | 0.72957200  | -1.82330100                 |
| C                                            | -4.43625600    | -1.11039600 | 0.19766100                  |
| H                                            | -3.65586900    | -1.78140600 | 0.56551700                  |
| H                                            | -4.95566700    | -1.65520300 | -0.60731400                 |
| H                                            | -7.35706300    | -0.91291200 | 2.12888600                  |
| N                                            | -3.79953700    | 0.09497100  | -0.34038000                 |
| C                                            | -4.63550800    | 0.84969200  | -1.25648100                 |
| H                                            | -5.66344500    | 0.82870100  | -0.88688800                 |
| H                                            | -4.31543800    | 1.89446200  | -1.29497000                 |
| H                                            | -4.63096300    | 0.44666400  | -2.28361300                 |
| Zero-point correction=                       |                |             | 0.359338 (Hartree/Particle) |
| Thermal correction to Energy=                |                |             | 0.380691                    |
| Thermal correction to Enthalpy=              |                |             | 0.381635                    |
| Thermal correction to Gibbs Free Energy=     |                |             | 0.305262                    |
| Sum of electronic and zero-point Energies=   |                |             | -941.511981                 |
| Sum of electronic and thermal Energies=      |                |             | -941.490628                 |
| Sum of electronic and thermal Enthalpies=    |                |             | -941.489684                 |
| Sum of electronic and thermal Free Energies= |                |             | -941.566057                 |
| E(RB3LYP) =                                  | -942.211366208 | A.U.        |                             |

#### Re5

|   |             |             |             |
|---|-------------|-------------|-------------|
| C | 4.22879100  | 0.10688800  | 0.42131600  |
| H | 4.17002800  | 0.86759200  | 1.19603600  |
| C | 3.17135600  | -0.22302800 | -0.31728200 |
| H | 3.24905500  | -0.99436000 | -1.08150100 |
| C | -0.47162600 | -0.23678300 | -0.02486900 |
| C | -1.38532500 | -1.29826300 | 0.05810400  |
| C | -0.93844400 | 1.08257600  | -0.05514500 |
| C | -2.74980000 | -1.03901400 | 0.10769200  |
| H | -0.99868900 | -2.31180700 | 0.08139900  |
| C | -2.31500600 | 1.32600700  | -0.00523500 |
| H | -0.25105200 | 1.91778400  | -0.11433600 |
| C | -3.22601800 | 0.27631400  | 0.07570400  |

|                                              |                |             |                             |
|----------------------------------------------|----------------|-------------|-----------------------------|
| H                                            | -3.44744300    | -1.86930100 | 0.17107000                  |
| H                                            | -2.66882000    | 2.35291200  | -0.02939000                 |
| H                                            | -4.29224800    | 0.47566500  | 0.11415700                  |
| C                                            | 1.82870200     | 0.43232200  | -0.20082400                 |
| H                                            | 1.80058900     | 1.11243200  | 0.66179400                  |
| H                                            | 1.61398200     | 1.02496700  | -1.10418500                 |
| H                                            | 5.19455900     | -0.36736800 | 0.27745400                  |
| O                                            | 0.84678200     | -0.59633000 | -0.06615700                 |
| Zero-point correction=                       |                |             | 0.166319 (Hartree/Particle) |
| Thermal correction to Energy=                |                |             | 0.175425                    |
| Thermal correction to Enthalpy=              |                |             | 0.176369                    |
| Thermal correction to Gibbs Free Energy=     |                |             | 0.131300                    |
| Sum of electronic and zero-point Energies=   |                |             | -424.013496                 |
| Sum of electronic and thermal Energies=      |                |             | -424.004390                 |
| Sum of electronic and thermal Enthalpies=    |                |             | -424.003446                 |
| Sum of electronic and thermal Free Energies= |                |             | -424.048514                 |
| E(RB3LYP) =                                  | -424.329669321 | A.U.        |                             |

#### D-TSa1

|    |             |             |             |
|----|-------------|-------------|-------------|
| C  | -1.46446600 | 0.35002300  | 0.63036500  |
| C  | -1.61972900 | 0.03112000  | 2.09022900  |
| O  | -1.27544900 | 0.84172700  | 2.92757300  |
| O  | -2.04004600 | -1.21331500 | 2.38714900  |
| C  | -2.02704800 | -1.54065200 | 3.79795000  |
| H  | -2.67239700 | -0.85810100 | 4.35362300  |
| H  | -2.39805500 | -2.56260600 | 3.86035700  |
| H  | -1.01102900 | -1.47298000 | 4.19141700  |
| C  | -2.10125200 | 1.59615800  | 0.15654800  |
| C  | -3.09511300 | 2.25981600  | 0.90429000  |
| C  | -1.72990100 | 2.13913900  | -1.09119100 |
| C  | -3.67632200 | 3.43280500  | 0.43010900  |
| H  | -3.39302600 | 1.87384600  | 1.87214200  |
| C  | -2.32332100 | 3.30159700  | -1.57203400 |
| H  | -0.97196100 | 1.63258100  | -1.68159900 |
| C  | -3.29537400 | 3.95444200  | -0.80798800 |
| H  | -4.42883700 | 3.93927500  | 1.02612900  |
| H  | -2.02389500 | 3.70567500  | -2.53411200 |
| H  | -3.75148600 | 4.86871500  | -1.17557500 |
| P  | 2.97115200  | -0.02095600 | -0.19169100 |
| Au | 0.59825800  | 0.09734200  | 0.16080900  |
| C  | 3.32921000  | -1.26609000 | -1.63095400 |
| C  | 2.40850200  | -2.49903000 | -1.46754400 |
| C  | 2.93766500  | -0.62019800 | -2.97811300 |
| C  | 4.79775800  | -1.73267200 | -1.70671900 |

|   |             |             |             |
|---|-------------|-------------|-------------|
| H | 2.59808700  | -3.07385400 | -0.56293000 |
| H | 1.35326100  | -2.21040800 | -1.47508500 |
| H | 2.57635400  | -3.16713100 | -2.32000200 |
| H | 3.60128900  | 0.19265300  | -3.27472400 |
| H | 3.00402300  | -1.38853000 | -3.75644100 |
| H | 1.90754100  | -0.25082600 | -2.97100100 |
| H | 4.91131200  | -2.38616000 | -2.57936700 |
| H | 5.50018700  | -0.90585500 | -1.82827000 |
| H | 5.09896500  | -2.31309900 | -0.83277800 |
| C | 3.60645100  | 1.75149400  | -0.64409600 |
| C | 2.61148500  | 2.40392600  | -1.63431500 |
| C | 3.59932700  | 2.64628600  | 0.61570800  |
| C | 5.02312600  | 1.76526600  | -1.25557100 |
| H | 2.53439100  | 1.88441600  | -2.58807600 |
| H | 1.60998600  | 2.48171100  | -1.20108100 |
| H | 2.95963200  | 3.42151300  | -1.84522100 |
| H | 4.36259000  | 2.36928700  | 1.34394800  |
| H | 3.81603800  | 3.67288900  | 0.30042200  |
| H | 2.62343900  | 2.65744500  | 1.10968500  |
| H | 5.32171900  | 2.80745700  | -1.41677300 |
| H | 5.76984100  | 1.31191800  | -0.60074300 |
| H | 5.06888200  | 1.26750400  | -2.22615100 |
| C | 3.77192400  | -0.63244200 | 1.46180300  |
| C | 3.08781500  | 0.08758700  | 2.64965300  |
| C | 3.48371300  | -2.13788400 | 1.64772600  |
| C | 5.29587400  | -0.40378600 | 1.53605300  |
| H | 3.25233500  | 1.16312100  | 2.66378300  |
| H | 2.00836800  | -0.08943900 | 2.66657600  |
| H | 3.50556500  | -0.31778100 | 3.57827700  |
| H | 4.02678200  | -2.76988300 | 0.94379600  |
| H | 3.81054300  | -2.42488000 | 2.65328100  |
| H | 2.41523900  | -2.36240100 | 1.57584500  |
| H | 5.66711900  | -0.83195200 | 2.47417200  |
| H | 5.83718500  | -0.88800500 | 0.72115400  |
| H | 5.56179900  | 0.65484000  | 1.54228600  |
| C | -2.58138600 | -3.95297500 | -2.02816300 |
| H | -3.18194800 | -4.50278900 | -1.30774700 |
| C | -1.91344700 | -2.84979100 | -1.68817800 |
| H | -1.31981900 | -2.31180800 | -2.42517400 |
| C | -3.79337400 | -0.76642500 | -0.46817300 |
| C | -4.22770300 | -0.29654600 | -1.70383000 |
| C | -4.68173100 | -1.09036400 | 0.55493900  |
| C | -5.59867800 | -0.14814200 | -1.92045400 |
| H | -3.50465200 | -0.05556200 | -2.47392900 |

|                                              |                |             |                             |
|----------------------------------------------|----------------|-------------|-----------------------------|
| C                                            | -6.04981800    | -0.93938900 | 0.32211200                  |
| H                                            | -4.30837500    | -1.44816900 | 1.50647000                  |
| C                                            | -6.50813700    | -0.46921100 | -0.91087400                 |
| H                                            | -5.95308800    | 0.21574200  | -2.87955600                 |
| H                                            | -6.75651700    | -1.18928900 | 1.10720500                  |
| H                                            | -7.57336000    | -0.35444500 | -1.08446700                 |
| C                                            | -1.88635500    | -2.31014900 | -0.29778000                 |
| H                                            | -2.48600600    | -2.89791400 | 0.39798300                  |
| H                                            | -0.87097700    | -2.21473900 | 0.09130300                  |
| H                                            | -2.54482000    | -4.35274400 | -3.03655000                 |
| O                                            | -2.39200500    | -0.91321100 | -0.27473500                 |
| Zero-point correction=                       |                |             | 0.689635 (Hartree/Particle) |
| Thermal correction to Energy=                |                |             | 0.730756                    |
| Thermal correction to Enthalpy=              |                |             | 0.731701                    |
| Thermal correction to Gibbs Free Energy=     |                |             | 0.615179                    |
| Sum of electronic and zero-point Energies=   |                |             | -1871.893600                |
| Sum of electronic and thermal Energies=      |                |             | -1871.852478                |
| Sum of electronic and thermal Enthalpies=    |                |             | -1871.851534                |
| Sum of electronic and thermal Free Energies= |                |             | -1871.968055                |
| E(RB3LYP) =                                  | -1873.24791788 | A.U.        |                             |

D-1a

|    |             |             |             |
|----|-------------|-------------|-------------|
| C  | -1.80786900 | 0.69539700  | 0.38399200  |
| C  | -2.00077300 | 0.85907000  | 1.86740900  |
| O  | -1.56871200 | 1.82520400  | 2.46438200  |
| O  | -2.62156500 | -0.17364900 | 2.48117900  |
| C  | -2.71038600 | -0.05678600 | 3.92072100  |
| H  | -3.24990600 | 0.85069900  | 4.19749300  |
| H  | -3.25014500 | -0.94343700 | 4.25067500  |
| H  | -1.71161800 | -0.02616700 | 4.36069100  |
| C  | -2.22395800 | 1.86289400  | -0.47151000 |
| C  | -2.95689000 | 2.95086900  | 0.03483200  |
| C  | -1.89902200 | 1.85928500  | -1.84168300 |
| C  | -3.34857200 | 3.99650700  | -0.80283800 |
| H  | -3.19431200 | 3.00191100  | 1.09116900  |
| C  | -2.30865500 | 2.89265800  | -2.68023500 |
| H  | -1.31031400 | 1.03967600  | -2.24369400 |
| C  | -3.03475400 | 3.96854000  | -2.16158300 |
| H  | -3.90287400 | 4.83318900  | -0.38888300 |
| H  | -2.04794100 | 2.86840500  | -3.73409000 |
| H  | -3.34388900 | 4.78191900  | -2.81074000 |
| P  | 2.65881100  | 0.00552400  | -0.00194400 |
| Au | 0.28322800  | 0.23624500  | 0.15188800  |
| C  | 3.12978900  | -0.49992400 | -1.80944100 |

|   |             |             |             |
|---|-------------|-------------|-------------|
| C | 2.14978400  | -1.59479300 | -2.29451400 |
| C | 2.92140400  | 0.70718600  | -2.75037600 |
| C | 4.57927300  | -1.00531300 | -1.96332100 |
| H | 2.22252500  | -2.52615700 | -1.73639200 |
| H | 1.11176500  | -1.25346700 | -2.24885000 |
| H | 2.38221000  | -1.82118100 | -3.34166200 |
| H | 3.65430600  | 1.50025900  | -2.59820500 |
| H | 3.03686400  | 0.35752600  | -3.78241100 |
| H | 1.91708900  | 1.13133000  | -2.65835000 |
| H | 4.76797600  | -1.20374500 | -3.02468100 |
| H | 5.31972300  | -0.27433700 | -1.63331200 |
| H | 4.75784400  | -1.93956800 | -1.42803600 |
| C | 3.41872400  | 1.73017700  | 0.44836400  |
| C | 2.59159800  | 2.84561500  | -0.23718700 |
| C | 3.27865200  | 1.97354400  | 1.96803300  |
| C | 4.90211600  | 1.88226600  | 0.05105200  |
| H | 2.61887500  | 2.80832000  | -1.32451800 |
| H | 1.54546800  | 2.82800800  | 0.08130500  |
| H | 3.01220500  | 3.81128900  | 0.06568200  |
| H | 3.92959000  | 1.33654700  | 2.56854800  |
| H | 3.57033500  | 3.00985800  | 2.17123200  |
| H | 2.24635400  | 1.85510000  | 2.31040500  |
| H | 5.25864300  | 2.85429000  | 0.41063000  |
| H | 5.54256900  | 1.11774100  | 0.49480500  |
| H | 5.05104900  | 1.87022000  | -1.03068200 |
| C | 3.23958800  | -1.34407200 | 1.25738000  |
| C | 2.44320000  | -1.18108400 | 2.57481500  |
| C | 2.88577900  | -2.74777500 | 0.71759200  |
| C | 4.75086600  | -1.29900700 | 1.56542600  |
| H | 2.62120500  | -0.23461400 | 3.08139700  |
| H | 1.36657700  | -1.27951000 | 2.40679100  |
| H | 2.74904400  | -1.98113700 | 3.25887600  |
| H | 3.48998100  | -3.04173700 | -0.14182300 |
| H | 3.08595200  | -3.47518300 | 1.51239800  |
| H | 1.82749900  | -2.83320400 | 0.45364900  |
| H | 4.99622400  | -2.13554400 | 2.22985400  |
| H | 5.36658000  | -1.40344000 | 0.67019200  |
| H | 5.04849200  | -0.38446000 | 2.08152800  |
| C | -5.81187900 | -2.26536900 | -0.10237800 |
| H | -5.99260800 | -2.18375700 | -1.17133400 |
| C | -4.95583700 | -1.46153900 | 0.53105400  |
| H | -4.78579700 | -1.54873900 | 1.60019900  |
| C | -2.19748700 | -1.75519700 | -0.55767500 |
| C | -1.77233900 | -2.70418400 | 0.36352200  |

|                                              |                |             |                             |
|----------------------------------------------|----------------|-------------|-----------------------------|
| C                                            | -2.15258700    | -1.96311500 | -1.93125800                 |
| C                                            | -1.26764100    | -3.91302300 | -0.12084000                 |
| H                                            | -1.84271200    | -2.49185200 | 1.42338700                  |
| C                                            | -1.65121200    | -3.18044800 | -2.39858400                 |
| H                                            | -2.50010000    | -1.19815200 | -2.61719900                 |
| C                                            | -1.20890200    | -4.15130800 | -1.49662900                 |
| H                                            | -0.93511000    | -4.67287700 | 0.57926400                  |
| H                                            | -1.61086500    | -3.36803200 | -3.46678200                 |
| H                                            | -0.82590500    | -5.09725100 | -1.86611800                 |
| C                                            | -4.24007000    | -0.35707300 | -0.16116800                 |
| H                                            | -4.47744800    | -0.29441900 | -1.22425300                 |
| H                                            | -4.39990100    | 0.61501100  | 0.30385200                  |
| H                                            | -6.37588200    | -3.02496700 | 0.42930000                  |
| O                                            | -2.74078000    | -0.53212500 | -0.06420400                 |
| Zero-point correction=                       |                |             | 0.689809 (Hartree/Particle) |
| Thermal correction to Energy=                |                |             | 0.731676                    |
| Thermal correction to Enthalpy=              |                |             | 0.732620                    |
| Thermal correction to Gibbs Free Energy=     |                |             | 0.613382                    |
| Sum of electronic and zero-point Energies=   |                |             | -1871.894162                |
| Sum of electronic and thermal Energies=      |                |             | -1871.852295                |
| Sum of electronic and thermal Enthalpies=    |                |             | -1871.851350                |
| Sum of electronic and thermal Free Energies= |                |             | -1871.970589                |
| E(RB3LYP) =                                  | -1873.25075934 | A.U.        |                             |

#### D-TSa2

1 1

|   |             |             |             |
|---|-------------|-------------|-------------|
| C | -1.97349100 | 0.19827600  | -0.23422100 |
| C | -1.84699600 | 1.11230600  | -1.33113900 |
| O | -0.87854600 | 1.03991000  | -2.12253800 |
| O | -2.75548500 | 2.10002200  | -1.43951500 |
| C | -2.45891000 | 3.13070300  | -2.40783200 |
| H | -2.44583600 | 2.71603400  | -3.41683200 |
| H | -3.26066300 | 3.86121100  | -2.30471600 |
| H | -1.49109100 | 3.58808800  | -2.19228100 |
| C | -1.86482300 | -1.27372900 | -0.37989600 |
| C | -1.91331100 | -1.89909900 | -1.64145300 |
| C | -1.70851900 | -2.09539400 | 0.75584200  |
| C | -1.79333100 | -3.28365500 | -1.75818700 |
| H | -2.02559300 | -1.29453600 | -2.53499800 |
| C | -1.62432900 | -3.48082100 | 0.63840000  |
| H | -1.64553100 | -1.63874700 | 1.74024200  |
| C | -1.65852200 | -4.08364900 | -0.62195800 |
| H | -1.82910500 | -3.73953600 | -2.74332500 |
| H | -1.51847600 | -4.09065700 | 1.53114200  |



|    |             |             |             |
|----|-------------|-------------|-------------|
| H  | -1.58341600 | -5.16247500 | -0.71582400 |
| P  | 2.91657100  | -0.08229700 | 0.22266800  |
| Au | 0.72709800  | 0.31394900  | -0.41770900 |
| C  | 2.94886100  | -0.58262000 | 2.09249600  |
| C  | 1.99847200  | 0.34488800  | 2.88530900  |
| C  | 2.38529500  | -2.01152100 | 2.25126100  |
| C  | 4.35740100  | -0.52496800 | 2.72118700  |
| H  | 2.30684800  | 1.38896900  | 2.88642600  |
| H  | 0.97843800  | 0.28699200  | 2.49454300  |
| H  | 1.98208300  | 0.00624600  | 3.92760500  |
| H  | 3.04676900  | -2.77877300 | 1.84778400  |
| H  | 2.27564500  | -2.21429500 | 3.32245600  |
| H  | 1.39817600  | -2.11712300 | 1.79189700  |
| H  | 4.29291900  | -0.89341200 | 3.75132500  |
| H  | 5.08061100  | -1.15232300 | 2.19759600  |
| H  | 4.75489700  | 0.49055900  | 2.76982700  |
| C  | 3.56912400  | -1.53155500 | -0.88859900 |
| C  | 2.47809800  | -2.62311900 | -1.00693400 |
| C  | 3.80962600  | -1.00819200 | -2.32153800 |
| C  | 4.87261500  | -2.16670200 | -0.35943000 |
| H  | 2.23112300  | -3.10357300 | -0.06252200 |
| H  | 1.55413200  | -2.23033400 | -1.44031300 |
| H  | 2.85583400  | -3.40065000 | -1.68064200 |
| H  | 4.66082700  | -0.33032100 | -2.39327700 |
| H  | 4.02995200  | -1.86933100 | -2.96164600 |
| H  | 2.92408600  | -0.51451400 | -2.73197700 |
| H  | 5.20656100  | -2.91948300 | -1.08247000 |
| H  | 5.68365100  | -1.44475200 | -0.24628700 |
| H  | 4.73403700  | -2.68153400 | 0.59336900  |
| C  | 3.93848600  | 1.53696200  | -0.07592900 |
| C  | 3.50668000  | 2.17197800  | -1.41926500 |
| C  | 3.60137300  | 2.57290500  | 1.01875900  |
| C  | 5.46412900  | 1.30188000  | -0.08815500 |
| H  | 3.71662000  | 1.54907500  | -2.28641400 |
| H  | 2.44030200  | 2.41435500  | -1.42588400 |
| H  | 4.06422800  | 3.10711800  | -1.54549300 |
| H  | 3.99093500  | 2.30244500  | 2.00128500  |
| H  | 4.06859900  | 3.52365200  | 0.73974200  |
| H  | 2.52441600  | 2.74916300  | 1.09746800  |
| H  | 5.96191100  | 2.27220600  | -0.19581900 |
| H  | 5.83245500  | 0.84992100  | 0.83477200  |
| H  | 5.78638200  | 0.68339900  | -0.92762900 |
| C  | -1.48134500 | 3.58383500  | 1.75272700  |
| H  | -0.56950200 | 3.12218000  | 2.12295400  |

|                                              |                |             |                             |
|----------------------------------------------|----------------|-------------|-----------------------------|
| C                                            | -2.59677700    | 2.87601900  | 1.56748200                  |
| H                                            | -3.50637300    | 3.34699600  | 1.20411600                  |
| C                                            | -4.41057400    | 0.07754700  | 0.64809300                  |
| C                                            | -4.80707800    | -0.90529400 | 1.54765300                  |
| C                                            | -5.25022500    | 0.60035300  | -0.32600100                 |
| C                                            | -6.11787300    | -1.37948900 | 1.46604400                  |
| H                                            | -4.11536600    | -1.29836300 | 2.28296500                  |
| C                                            | -6.55478400    | 0.10542100  | -0.39533100                 |
| H                                            | -4.88807300    | 1.36106200  | -1.00447100                 |
| C                                            | -6.98866600    | -0.87701500 | 0.49705600                  |
| H                                            | -6.45077400    | -2.14775200 | 2.15626600                  |
| H                                            | -7.23225500    | 0.49731900  | -1.14715400                 |
| H                                            | -8.00506600    | -1.25242700 | 0.43680600                  |
| C                                            | -2.68599700    | 1.43427300  | 1.92509000                  |
| H                                            | -1.73526300    | 1.02810500  | 2.26853300                  |
| H                                            | -3.48119400    | 1.22691300  | 2.64369500                  |
| H                                            | -1.44603000    | 4.65090400  | 1.55785800                  |
| O                                            | -3.05469200    | 0.58023600  | 0.74069000                  |
| Zero-point correction=                       |                |             | 0.689251 (Hartree/Particle) |
| Thermal correction to Energy=                |                |             | 0.730425                    |
| Thermal correction to Enthalpy=              |                |             | 0.731369                    |
| Thermal correction to Gibbs Free Energy=     |                |             | 0.613125                    |
| Sum of electronic and zero-point Energies=   |                |             | -1871.856526                |
| Sum of electronic and thermal Energies=      |                |             | -1871.815352                |
| Sum of electronic and thermal Enthalpies=    |                |             | -1871.814408                |
| Sum of electronic and thermal Free Energies= |                |             | -1871.932651                |
| E(RB3LYP) =                                  | -1873.20612372 | A.U.        |                             |

#### D-TSa21

|     |            |             |             |
|-----|------------|-------------|-------------|
| 1 1 |            |             |             |
| C   | 1.94988200 | -0.17557400 | 0.54054100  |
| C   | 1.78356200 | -1.04603000 | 1.65831700  |
| O   | 1.00175600 | -0.84438800 | 2.59061200  |
| O   | 2.52487500 | -2.20442000 | 1.58301500  |
| C   | 2.28991200 | -3.14230400 | 2.65009000  |
| H   | 1.25861300 | -3.50272200 | 2.62858900  |
| H   | 2.98220400 | -3.96547200 | 2.47226000  |
| H   | 2.48163800 | -2.68216300 | 3.62128500  |
| C   | 1.54119200 | 1.23196500  | 0.45961600  |
| C   | 1.09722400 | 1.95692800  | 1.61204500  |
| C   | 1.61976000 | 1.96328000  | -0.76647600 |
| C   | 0.80223700 | 3.31794900  | 1.52869400  |
| H   | 1.02212900 | 1.43002200  | 2.55461200  |
| C   | 1.33697200 | 3.32603400  | -0.81820600 |

|    |             |             |             |
|----|-------------|-------------|-------------|
| H  | 1.93055100  | 1.44903000  | -1.66898500 |
| C  | 0.93544700  | 4.01742600  | 0.32737000  |
| H  | 0.48680400  | 3.83815100  | 2.42842100  |
| H  | 1.43183800  | 3.84959200  | -1.76512800 |
| H  | 0.72346600  | 5.08056100  | 0.28201900  |
| P  | -2.91709800 | -0.23872200 | -0.20156400 |
| Au | -0.69469900 | 0.39127600  | 0.08316200  |
| C  | -3.04341300 | -1.41198100 | -1.73792100 |
| C  | -2.16543300 | -0.85424400 | -2.88291600 |
| C  | -2.45650800 | -2.79400500 | -1.37936100 |
| C  | -4.48814200 | -1.59658400 | -2.24855300 |
| H  | -2.49726900 | 0.11087900  | -3.26016200 |
| H  | -1.12047800 | -0.75872600 | -2.57378000 |
| H  | -2.20534800 | -1.56344600 | -3.71763300 |
| H  | -3.07045900 | -3.35056000 | -0.67057500 |
| H  | -2.40419000 | -3.38969300 | -2.29744800 |
| H  | -1.44117300 | -2.71387800 | -0.97940600 |
| H  | -4.47359400 | -2.31680200 | -3.07442800 |
| H  | -5.16119000 | -1.99285300 | -1.48613800 |
| H  | -4.91601400 | -0.67180000 | -2.63939400 |
| C  | -3.45730500 | -1.15166500 | 1.42049400  |
| C  | -2.33148900 | -2.11514300 | 1.86939800  |
| C  | -3.62415100 | -0.12553600 | 2.56289100  |
| C  | -4.77456500 | -1.93925500 | 1.25580000  |
| H  | -2.13213300 | -2.91372700 | 1.15664800  |
| H  | -1.39458200 | -1.59033200 | 2.07801400  |
| H  | -2.65569600 | -2.58947300 | 2.80297300  |
| H  | -4.48186000 | 0.53482900  | 2.42777900  |
| H  | -3.79205800 | -0.68355300 | 3.49040400  |
| H  | -2.72381300 | 0.47800700  | 2.70754200  |
| H  | -5.04366600 | -2.36553900 | 2.22873200  |
| H  | -5.60895900 | -1.31253700 | 0.93505700  |
| H  | -4.68123900 | -2.77365600 | 0.55782700  |
| C  | -3.95111700 | 1.37595700  | -0.47798900 |
| C  | -3.44954500 | 2.47353200  | 0.49094700  |
| C  | -3.70211100 | 1.91324400  | -1.90386200 |
| C  | -5.46678300 | 1.16868500  | -0.27267100 |
| H  | -3.58465500 | 2.22464100  | 1.54192900  |
| H  | -2.39337800 | 2.70486600  | 0.32651600  |
| H  | -4.02550100 | 3.38498100  | 0.29403500  |
| H  | -4.14749100 | 1.29202400  | -2.68221600 |
| H  | -4.16820900 | 2.90184100  | -1.97797800 |
| H  | -2.63572600 | 2.03919100  | -2.11313800 |
| H  | -5.97902900 | 2.10692300  | -0.51339100 |

|                                              |                |             |                             |
|----------------------------------------------|----------------|-------------|-----------------------------|
| H                                            | -5.88253400    | 0.39623500  | -0.92213700                 |
| H                                            | -5.71921700    | 0.92300300  | 0.76050900                  |
| C                                            | 4.13979700     | -2.28615300 | -3.27925900                 |
| H                                            | 4.73340100     | -3.01248300 | -2.72992100                 |
| C                                            | 3.15824900     | -1.59536700 | -2.69503300                 |
| H                                            | 2.56915500     | -0.87995400 | -3.26555800                 |
| C                                            | 4.34344800     | -0.10355300 | -0.26440400                 |
| C                                            | 5.07894000     | -0.61724300 | 0.79612300                  |
| C                                            | 4.85025800     | 0.82310500  | -1.16548700                 |
| C                                            | 6.38980500     | -0.16483800 | 0.95694900                  |
| H                                            | 4.63716600     | -1.34038300 | 1.46866000                  |
| C                                            | 6.16477100     | 1.26171500  | -0.98555300                 |
| H                                            | 4.24457800     | 1.19381300  | -1.98204500                 |
| C                                            | 6.93141900     | 0.77073900  | 0.07177800                  |
| H                                            | 6.98637800     | -0.54821900 | 1.77842700                  |
| H                                            | 6.58277200     | 1.98840800  | -1.67452900                 |
| H                                            | 7.95119100     | 1.11646000  | 0.20685600                  |
| C                                            | 2.76338400     | -1.81437000 | -1.28071700                 |
| H                                            | 1.69522200     | -1.98098900 | -1.14222100                 |
| H                                            | 3.33821400     | -2.58761000 | -0.77461800                 |
| H                                            | 4.37581700     | -2.15978200 | -4.33110800                 |
| O                                            | 2.96734900     | -0.54211200 | -0.46229600                 |
| Zero-point correction=                       |                |             | 0.689862 (Hartree/Particle) |
| Thermal correction to Energy=                |                |             | 0.730785                    |
| Thermal correction to Enthalpy=              |                |             | 0.731729                    |
| Thermal correction to Gibbs Free Energy=     |                |             | 0.615322                    |
| Sum of electronic and zero-point Energies=   |                |             | -1871.859643                |
| Sum of electronic and thermal Energies=      |                |             | -1871.818720                |
| Sum of electronic and thermal Enthalpies=    |                |             | -1871.817776                |
| Sum of electronic and thermal Free Energies= |                |             | -1871.934183                |
| E(RB3LYP) =                                  | -1873.21115687 | A.U.        |                             |

#### D-2a

|   |            |             |             |
|---|------------|-------------|-------------|
| C | 2.68053500 | -0.50991900 | 0.39729400  |
| C | 2.42422700 | -0.05929400 | 1.72580400  |
| O | 1.46527600 | -0.41068000 | 2.41434800  |
| O | 3.36488000 | 0.82409300  | 2.19839900  |
| C | 3.12119000 | 1.31146100  | 3.52959800  |
| H | 3.09110400 | 0.48700100  | 4.24532100  |
| H | 3.95206400 | 1.98084100  | 3.75355100  |
| H | 2.17388900 | 1.85342700  | 3.57714300  |
| C | 1.99493400 | -1.51645000 | -0.32448500 |
| C | 0.93357600 | -2.29346500 | 0.29459800  |
| C | 2.32314800 | -1.85892200 | -1.67070500 |

|    |             |             |             |
|----|-------------|-------------|-------------|
| C  | 0.37586500  | -3.41111800 | -0.40211100 |
| H  | 0.86817300  | -2.26532300 | 1.37954900  |
| C  | 1.71071400  | -2.91383200 | -2.32494900 |
| H  | 3.10885300  | -1.31550600 | -2.18223200 |
| C  | 0.72813100  | -3.70920900 | -1.70581000 |
| H  | -0.33369500 | -4.03706900 | 0.13208200  |
| H  | 2.01540700  | -3.14109400 | -3.34324800 |
| H  | 0.28062600  | -4.54574100 | -2.23066000 |
| P  | -2.79771600 | 0.44666900  | 0.04164200  |
| Au | -0.91332000 | -0.97388500 | 0.07686300  |
| C  | -2.88475000 | 1.30761900  | -1.69071700 |
| C  | -1.45840100 | 1.72808200  | -2.11982400 |
| C  | -3.36660900 | 0.29254400  | -2.75042300 |
| C  | -3.81272100 | 2.54035900  | -1.72148300 |
| H  | -1.00016500 | 2.46503500  | -1.46254300 |
| H  | -0.79090400 | 0.86346700  | -2.18330700 |
| H  | -1.52363700 | 2.17352400  | -3.11953300 |
| H  | -4.41595400 | 0.01805800  | -2.63620300 |
| H  | -3.26327200 | 0.75813200  | -3.73691700 |
| H  | -2.75976900 | -0.61747500 | -2.75357700 |
| H  | -3.85494300 | 2.91911400  | -2.74910100 |
| H  | -4.83521100 | 2.30671400  | -1.41941500 |
| H  | -3.44782700 | 3.35587600  | -1.09443000 |
| C  | -4.37486200 | -0.63341700 | 0.35248900  |
| C  | -4.26256700 | -1.94328600 | -0.46449500 |
| C  | -4.42866800 | -1.05771800 | 1.83703700  |
| C  | -5.69312500 | 0.08384000  | -0.00759000 |
| H  | -4.25580200 | -1.79066700 | -1.54227100 |
| H  | -3.36576000 | -2.50825300 | -0.19413600 |
| H  | -5.13283000 | -2.56606400 | -0.22822900 |
| H  | -4.63687200 | -0.22868800 | 2.51454800  |
| H  | -5.24633300 | -1.77788200 | 1.95156400  |
| H  | -3.50943900 | -1.55586100 | 2.15851800  |
| H  | -6.52857700 | -0.57356400 | 0.25854600  |
| H  | -5.82866700 | 1.01859300  | 0.53962800  |
| H  | -5.78091000 | 0.29378800  | -1.07520000 |
| C  | -2.56319800 | 1.75256200  | 1.45216800  |
| C  | -2.00878500 | 1.04571000  | 2.71382400  |
| C  | -1.48548100 | 2.77426900  | 1.03035300  |
| C  | -3.85990300 | 2.50867900  | 1.80757400  |
| H  | -2.67536000 | 0.28834000  | 3.12209400  |
| H  | -1.03400000 | 0.58457800  | 2.53023900  |
| H  | -1.87260200 | 1.80798200  | 3.49018800  |
| H  | -1.81067200 | 3.43770500  | 0.22757400  |

|                                              |                |             |                             |
|----------------------------------------------|----------------|-------------|-----------------------------|
| H                                            | -1.26336800    | 3.40570600  | 1.89789000                  |
| H                                            | -0.55199600    | 2.28598300  | 0.73550900                  |
| H                                            | -3.62208200    | 3.27072200  | 2.55851900                  |
| H                                            | -4.29986800    | 3.02202600  | 0.95039500                  |
| H                                            | -4.61861100    | 1.85691500  | 2.24412600                  |
| C                                            | 5.60066500     | -2.55648300 | 0.90914200                  |
| H                                            | 5.58274800     | -2.19792400 | 1.93499200                  |
| C                                            | 5.42119600     | -1.73140100 | -0.12591800                 |
| H                                            | 5.44702400     | -2.10463400 | -1.14588800                 |
| C                                            | 3.59320200     | 1.48494700  | -0.79469800                 |
| C                                            | 2.79583100     | 1.63888800  | -1.92205600                 |
| C                                            | 4.21872100     | 2.54840600  | -0.15759200                 |
| C                                            | 2.62074300     | 2.92724000  | -2.43066500                 |
| H                                            | 2.32488900     | 0.78173300  | -2.38665600                 |
| C                                            | 4.03786100     | 3.82789200  | -0.69006600                 |
| H                                            | 4.81040800     | 2.39489700  | 0.73464400                  |
| C                                            | 3.24300900     | 4.01907200  | -1.82078000                 |
| H                                            | 2.00731000     | 3.07057100  | -3.31439600                 |
| H                                            | 4.51923000     | 4.67402800  | -0.21046200                 |
| H                                            | 3.11045600     | 5.01629800  | -2.22768200                 |
| C                                            | 5.23841200     | -0.27456300 | 0.06210100                  |
| H                                            | 5.35790300     | 0.04876800  | 1.09414800                  |
| H                                            | 5.82601500     | 0.33466600  | -0.62489200                 |
| H                                            | 5.78552500     | -3.61613300 | 0.76461200                  |
| O                                            | 3.78712000     | 0.13275200  | -0.30736000                 |
| Zero-point correction=                       |                |             | 0.690784 (Hartree/Particle) |
| Thermal correction to Energy=                |                |             | 0.732153                    |
| Thermal correction to Enthalpy=              |                |             | 0.733098                    |
| Thermal correction to Gibbs Free Energy=     |                |             | 0.615897                    |
| Sum of electronic and zero-point Energies=   |                |             | -1871.873193                |
| Sum of electronic and thermal Energies=      |                |             | -1871.831823                |
| Sum of electronic and thermal Enthalpies=    |                |             | -1871.830879                |
| Sum of electronic and thermal Free Energies= |                |             | -1871.948080                |
| E(RB3LYP) =                                  | -1873.22400528 | A.U.        |                             |

#### D-TSa3

|   |             |             |             |
|---|-------------|-------------|-------------|
| C | -2.71483300 | -0.60253400 | -0.22585000 |
| C | -2.12126200 | 0.07529500  | -1.29714500 |
| O | -0.95766800 | -0.15981700 | -1.77635600 |
| O | -2.86469700 | 1.06192000  | -1.85019600 |
| C | -2.25126100 | 1.83192700  | -2.89665900 |
| H | -1.99103400 | 1.19877100  | -3.74786700 |
| H | -3.00173000 | 2.56693100  | -3.18715400 |
| H | -1.35199200 | 2.33799800  | -2.53681700 |

|    |             |             |             |
|----|-------------|-------------|-------------|
| C  | -2.26659700 | -1.82642900 | 0.43077900  |
| C  | -2.83992300 | -2.23168900 | 1.65767100  |
| C  | -1.29222800 | -2.67683000 | -0.14498100 |
| C  | -2.44458600 | -3.41102400 | 2.28711100  |
| H  | -3.60305700 | -1.61713300 | 2.12325800  |
| C  | -0.89911600 | -3.84946600 | 0.49654500  |
| H  | -0.86887200 | -2.42385400 | -1.10869800 |
| C  | -1.46613600 | -4.22612600 | 1.71700900  |
| H  | -2.90667400 | -3.69160000 | 3.22923000  |
| H  | -0.15676500 | -4.48707800 | 0.02418500  |
| H  | -1.16088900 | -5.14534300 | 2.20681600  |
| P  | 3.01421000  | 0.25900800  | 0.20029400  |
| Au | 0.92012900  | 0.03981700  | -0.77025600 |
| C  | 3.08181900  | -0.91185100 | 1.74173800  |
| C  | 1.74997300  | -0.80275000 | 2.52197200  |
| C  | 3.18272000  | -2.37899600 | 1.27087600  |
| C  | 4.26056700  | -0.60546500 | 2.68917100  |
| H  | 1.56432100  | 0.18734100  | 2.93335400  |
| H  | 0.89594500  | -1.08601500 | 1.90099700  |
| H  | 1.79388500  | -1.50393500 | 3.36307000  |
| H  | 4.14277200  | -2.61776500 | 0.81208200  |
| H  | 3.07735400  | -3.02265200 | 2.15104300  |
| H  | 2.37814900  | -2.64194700 | 0.57812500  |
| H  | 4.26360300  | -1.35479000 | 3.48886000  |
| H  | 5.23097400  | -0.65917000 | 2.19220500  |
| H  | 4.17282500  | 0.37096300  | 3.16941000  |
| C  | 4.32626100  | -0.25812400 | -1.12601500 |
| C  | 3.82771800  | -1.52005700 | -1.87141100 |
| C  | 4.45250600  | 0.85020700  | -2.19500900 |
| C  | 5.72117300  | -0.53662400 | -0.52663100 |
| H  | 3.70845400  | -2.39142500 | -1.23021100 |
| H  | 2.87723200  | -1.33752000 | -2.38096400 |
| H  | 4.56986000  | -1.77541100 | -2.63621000 |
| H  | 4.93531200  | 1.75460800  | -1.82219500 |
| H  | 5.07842300  | 0.46452300  | -3.00697100 |
| H  | 3.48410400  | 1.11567200  | -2.62885200 |
| H  | 6.41538900  | -0.74265200 | -1.34903300 |
| H  | 6.12160500  | 0.31234200  | 0.03059700  |
| H  | 5.73126400  | -1.41215600 | 0.12522000  |
| C  | 3.24563200  | 2.10766100  | 0.72430300  |
| C  | 2.70310000  | 3.02802400  | -0.39532100 |
| C  | 2.38912700  | 2.40322200  | 1.97495100  |
| C  | 4.71372100  | 2.47801600  | 1.02180400  |
| H  | 3.23144700  | 2.92659300  | -1.34113100 |

|                                              |                |             |                             |
|----------------------------------------------|----------------|-------------|-----------------------------|
| H                                            | 1.63889900     | 2.85282700  | -0.57692800                 |
| H                                            | 2.81852400     | 4.06667200  | -0.06512000                 |
| H                                            | 2.76563400     | 1.91975900  | 2.87720700                  |
| H                                            | 2.41596700     | 3.48363500  | 2.15428300                  |
| H                                            | 1.34197400     | 2.12104200  | 1.83073300                  |
| H                                            | 4.74325000     | 3.51258400  | 1.38181700                  |
| H                                            | 5.16104800     | 1.85212900  | 1.79582200                  |
| H                                            | 5.34545200     | 2.43105900  | 0.13317800                  |
| C                                            | -4.58849400    | -2.04407500 | -2.33262600                 |
| H                                            | -4.15927500    | -2.82825800 | -1.71616200                 |
| C                                            | -5.33780600    | -1.05647700 | -1.79798700                 |
| H                                            | -5.75030600    | -0.27412400 | -2.42853800                 |
| C                                            | -4.08292400    | 1.15855300  | 0.83402400                  |
| C                                            | -4.84787300    | 2.14262400  | 0.21969000                  |
| C                                            | -3.47278900    | 1.35099600  | 2.06988500                  |
| C                                            | -5.01794300    | 3.36206000  | 0.88010000                  |
| H                                            | -5.27978400    | 1.97023200  | -0.75858400                 |
| C                                            | -3.64097000    | 2.58113800  | 2.70792500                  |
| H                                            | -2.88261200    | 0.55976200  | 2.51770600                  |
| C                                            | -4.41674200    | 3.58319200  | 2.11997700                  |
| H                                            | -5.61440100    | 4.14068600  | 0.41532800                  |
| H                                            | -3.17431900    | 2.74788400  | 3.67370300                  |
| H                                            | -4.55135700    | 4.53329700  | 2.62676800                  |
| C                                            | -5.48020300    | -0.93764300 | -0.37545100                 |
| H                                            | -5.32902900    | -1.83389900 | 0.21817200                  |
| H                                            | -6.19940000    | -0.23751500 | 0.03556400                  |
| H                                            | -4.40940600    | -2.10644200 | -3.40143800                 |
| O                                            | -3.95911900    | -0.11808300 | 0.21371400                  |
| Zero-point correction=                       |                |             | 0.689387 (Hartree/Particle) |
| Thermal correction to Energy=                |                |             | 0.730418                    |
| Thermal correction to Enthalpy=              |                |             | 0.731362                    |
| Thermal correction to Gibbs Free Energy=     |                |             | 0.614458                    |
| Sum of electronic and zero-point Energies=   |                |             | -1871.878290                |
| Sum of electronic and thermal Energies=      |                |             | -1871.837259                |
| Sum of electronic and thermal Enthalpies=    |                |             | -1871.836315                |
| Sum of electronic and thermal Free Energies= |                |             | -1871.953219                |
| E(RB3LYP) =                                  | -1873.22161092 | A.U.        |                             |

D-TS1

1 1

|   |             |            |             |
|---|-------------|------------|-------------|
| C | -1.10948200 | 0.94360200 | 0.36792900  |
| C | -0.99827500 | 2.44209400 | 0.43978300  |
| O | -0.88870900 | 3.02266200 | 1.50295600  |
| O | -0.89908700 | 3.07219500 | -0.75271000 |



|    |             |             |             |
|----|-------------|-------------|-------------|
| C  | -0.62075700 | 4.48748400  | -0.67771600 |
| H  | 0.34890100  | 4.65930400  | -0.20558200 |
| H  | -0.61360300 | 4.83570700  | -1.70975000 |
| H  | -1.39252800 | 5.00090500  | -0.10079200 |
| C  | -1.96069600 | 0.29433300  | 1.37274400  |
| C  | -2.99419900 | 0.98282000  | 2.05256400  |
| C  | -1.74855800 | -1.06192200 | 1.71020200  |
| C  | -3.73703200 | 0.35858900  | 3.04899700  |
| H  | -3.18095300 | 2.02592500  | 1.82671700  |
| C  | -2.49971800 | -1.69031300 | 2.69829600  |
| H  | -0.96792400 | -1.61219000 | 1.19390400  |
| C  | -3.49330100 | -0.97896600 | 3.37585100  |
| H  | -4.50299700 | 0.91704800  | 3.57844400  |
| H  | -2.30620200 | -2.72908400 | 2.94721500  |
| H  | -4.07283400 | -1.46257200 | 4.15658800  |
| P  | 3.15081200  | -0.46798000 | -0.16893000 |
| Au | 0.85991800  | 0.21667200  | 0.04241400  |
| C  | 3.24109000  | -2.07264200 | -1.25243000 |
| C  | 2.09933500  | -3.02732700 | -0.82813400 |
| C  | 2.96914400  | -1.71088500 | -2.72866900 |
| C  | 4.58858700  | -2.81779400 | -1.16062200 |
| H  | 2.19497700  | -3.39919100 | 0.19021500  |
| H  | 1.12079700  | -2.54717800 | -0.92495900 |
| H  | 2.11176700  | -3.89653900 | -1.49589600 |
| H  | 3.77951600  | -1.14327900 | -3.18730500 |
| H  | 2.86973100  | -2.64290000 | -3.29618900 |
| H  | 2.03509400  | -1.15345900 | -2.84921600 |
| H  | 4.56462000  | -3.66907900 | -1.85082500 |
| H  | 5.43731400  | -2.19350700 | -1.44603200 |
| H  | 4.77828100  | -3.22148700 | -0.16431600 |
| C  | 4.12279300  | 0.97955000  | -1.01243000 |
| C  | 3.27533000  | 1.54660500  | -2.17760300 |
| C  | 4.29049800  | 2.13848000  | -0.00575100 |
| C  | 5.51254300  | 0.57179500  | -1.54349300 |
| H  | 3.09938500  | 0.83358200  | -2.98071400 |
| H  | 2.30607000  | 1.91536400  | -1.82860900 |
| H  | 3.81736000  | 2.39576700  | -2.60961300 |
| H  | 4.98420400  | 1.90680500  | 0.80306800  |
| H  | 4.70153000  | 2.99932500  | -0.54469600 |
| H  | 3.33437400  | 2.44844100  | 0.42651900  |
| H  | 6.00931400  | 1.46411500  | -1.94138100 |
| H  | 6.15878600  | 0.16111000  | -0.76544100 |
| H  | 5.45563000  | -0.15159100 | -2.35953000 |
| C  | 3.83570700  | -0.80552200 | 1.61048000  |

|                                              |                |             |                             |
|----------------------------------------------|----------------|-------------|-----------------------------|
| C                                            | 3.30927200     | 0.29083800  | 2.56913500                  |
| C                                            | 3.26809600     | -2.14145500 | 2.14007200                  |
| C                                            | 5.37605300     | -0.85467500 | 1.68673000                  |
| H                                            | 3.65967900     | 1.29225300  | 2.32677600                  |
| H                                            | 2.21603500     | 0.31087400  | 2.59967100                  |
| H                                            | 3.66429600     | 0.05732300  | 3.57939900                  |
| H                                            | 3.67704900     | -3.01562500 | 1.63114300                  |
| H                                            | 3.54206900     | -2.22936300 | 3.19708900                  |
| H                                            | 2.17591900     | -2.17441900 | 2.08434200                  |
| H                                            | 5.66540200     | -1.12259500 | 2.70933100                  |
| H                                            | 5.81001100     | -1.60220900 | 1.02009600                  |
| H                                            | 5.83875000     | 0.10972000  | 1.46838500                  |
| C                                            | -8.71379200    | -1.28003100 | -1.59274400                 |
| H                                            | -9.09961200    | -2.06458000 | -0.94647100                 |
| C                                            | -7.53726600    | -0.69717700 | -1.36432100                 |
| H                                            | -7.17708600    | 0.08318500  | -2.03238200                 |
| C                                            | -4.36694500    | -0.82617200 | -0.95440900                 |
| C                                            | -4.40172000    | 0.58955700  | -0.99182200                 |
| C                                            | -3.18015600    | -1.52113700 | -1.32810200                 |
| C                                            | -3.25451700    | 1.27972100  | -1.32013000                 |
| H                                            | -5.31861900    | 1.12761800  | -0.78814200                 |
| C                                            | -2.04809100    | -0.81872400 | -1.63779700                 |
| H                                            | -3.21866400    | -2.60433900 | -1.36065200                 |
| C                                            | -2.01349300    | 0.60890000  | -1.52671500                 |
| H                                            | -3.27403100    | 2.36256300  | -1.37282800                 |
| H                                            | -1.14418200    | -1.34624600 | -1.92535400                 |
| H                                            | -1.21998400    | 1.15040000  | -2.02453700                 |
| C                                            | -6.66764200    | -1.05043100 | -0.19550200                 |
| H                                            | -6.47534100    | -0.19775500 | 0.46517400                  |
| H                                            | -7.11624200    | -1.84946100 | 0.39644600                  |
| H                                            | -9.33955000    | -0.98797600 | -2.43003900                 |
| O                                            | -5.38584100    | -1.60651500 | -0.61554600                 |
| Zero-point correction=                       |                |             | 0.689592 (Hartree/Particle) |
| Thermal correction to Energy=                |                |             | 0.730882                    |
| Thermal correction to Enthalpy=              |                |             | 0.731826                    |
| Thermal correction to Gibbs Free Energy=     |                |             | 0.614161                    |
| Sum of electronic and zero-point Energies=   |                |             | -1871.892450                |
| Sum of electronic and thermal Energies=      |                |             | -1871.851160                |
| Sum of electronic and thermal Enthalpies=    |                |             | -1871.850216                |
| Sum of electronic and thermal Free Energies= |                |             | -1871.967881                |
| E(RB3LYP) =                                  | -1892.70836148 | A.U.        |                             |

D-1

1 1

|    |             |             |             |
|----|-------------|-------------|-------------|
| C  | -1.17939700 | 1.00558000  | -0.18864200 |
| C  | -0.83751000 | 2.30771200  | -0.86005300 |
| O  | -0.31285700 | 3.25935000  | -0.31216800 |
| O  | -1.12358900 | 2.31900400  | -2.19702100 |
| C  | -0.68252000 | 3.49170600  | -2.90884500 |
| H  | 0.40648200  | 3.57088200  | -2.87527700 |
| H  | -1.02421700 | 3.35790000  | -3.93495800 |
| H  | -1.11554500 | 4.39269700  | -2.46979000 |
| C  | -1.70489300 | 1.15736800  | 1.23485300  |
| C  | -2.30729600 | 2.34295200  | 1.69091800  |
| C  | -1.64943100 | 0.07366900  | 2.12838600  |
| C  | -2.82112900 | 2.43890500  | 2.98464700  |
| H  | -2.34707700 | 3.21234000  | 1.04492800  |
| C  | -2.17295600 | 0.16220600  | 3.41892100  |
| H  | -1.17454500 | -0.85141900 | 1.81207900  |
| C  | -2.76109800 | 1.34979300  | 3.85507700  |
| H  | -3.26621300 | 3.37380700  | 3.31296200  |
| H  | -2.10600800 | -0.69234800 | 4.08632200  |
| H  | -3.15785200 | 1.42879900  | 4.86271600  |
| P  | 3.10806000  | -0.57997600 | -0.01358400 |
| Au | 0.82495700  | 0.14207900  | -0.14112200 |
| C  | 3.58818800  | -1.46262900 | -1.66941400 |
| C  | 2.43045800  | -2.40043500 | -2.08987100 |
| C  | 3.71167600  | -0.41242500 | -2.79515100 |
| C  | 4.89941900  | -2.27198200 | -1.59471700 |
| H  | 2.25581800  | -3.22020500 | -1.39512300 |
| H  | 1.49560400  | -1.84445000 | -2.20913500 |
| H  | 2.68268500  | -2.84283300 | -3.06060700 |
| H  | 4.58146300  | 0.23591900  | -2.68324700 |
| H  | 3.82816800  | -0.94489900 | -3.74580500 |
| H  | 2.81417400  | 0.20818300  | -2.87455000 |
| H  | 5.11462100  | -2.68162700 | -2.58849400 |
| H  | 5.75618600  | -1.66175700 | -1.30240800 |
| H  | 4.83065800  | -3.11826300 | -0.90860400 |
| C  | 4.18302700  | 1.01018200  | 0.25170900  |
| C  | 3.65542900  | 2.13933800  | -0.66805300 |
| C  | 3.99727000  | 1.51950900  | 1.69824400  |
| C  | 5.68740200  | 0.79710800  | -0.01593900 |
| H  | 3.74572300  | 1.91609000  | -1.72991000 |
| H  | 2.61174900  | 2.38622600  | -0.45363500 |
| H  | 4.25176800  | 3.03821100  | -0.47318500 |
| H  | 4.47135700  | 0.87905100  | 2.44347700  |
| H  | 4.47274400  | 2.50366800  | 1.77311100  |
| H  | 2.94220700  | 1.64858300  | 1.95667500  |

|                                              |             |             |                             |
|----------------------------------------------|-------------|-------------|-----------------------------|
| H                                            | 6.21859400  | 1.72452000  | 0.22710700                  |
| H                                            | 6.11943600  | 0.00517000  | 0.59875200                  |
| H                                            | 5.90062900  | 0.57372200  | -1.06344200                 |
| C                                            | 3.30627000  | -1.79041500 | 1.48494100                  |
| C                                            | 2.48869800  | -1.24874700 | 2.68267900                  |
| C                                            | 2.68083400  | -3.15565200 | 1.12427600                  |
| C                                            | 4.76696900  | -2.01269400 | 1.92855400                  |
| H                                            | 2.86589200  | -0.30908400 | 3.08078800                  |
| H                                            | 1.43524000  | -1.10693300 | 2.42537900                  |
| H                                            | 2.53857100  | -1.98792600 | 3.49070200                  |
| H                                            | 3.25179300  | -3.70565700 | 0.37494300                  |
| H                                            | 2.66082400  | -3.77279700 | 2.02945700                  |
| H                                            | 1.64848300  | -3.05117800 | 0.77634200                  |
| H                                            | 4.77620700  | -2.74638500 | 2.74299400                  |
| H                                            | 5.39803300  | -2.40691800 | 1.12986800                  |
| H                                            | 5.22999400  | -1.10263000 | 2.31404300                  |
| C                                            | -8.83136600 | -2.11069900 | -1.21300600                 |
| H                                            | -9.21562200 | -2.75143300 | -0.42339000                 |
| C                                            | -7.74408600 | -1.35859000 | -1.04172800                 |
| H                                            | -7.38361600 | -0.72486300 | -1.84985300                 |
| C                                            | -4.61360800 | -1.20057200 | -0.32303000                 |
| C                                            | -4.66982300 | 0.16655300  | -0.73799500                 |
| C                                            | -3.37994000 | -1.92893700 | -0.37081500                 |
| C                                            | -3.52127700 | 0.77858100  | -1.13683800                 |
| H                                            | -5.61169900 | 0.70043800  | -0.74958700                 |
| C                                            | -2.23590400 | -1.29365400 | -0.72614500                 |
| H                                            | -3.40630700 | -2.97648600 | -0.09181000                 |
| C                                            | -2.19100300 | 0.13614400  | -1.09397800                 |
| H                                            | -3.55269500 | 1.80771800  | -1.48075400                 |
| H                                            | -1.29356900 | -1.83397300 | -0.73788400                 |
| H                                            | -1.73915200 | 0.22110800  | -2.09412700                 |
| C                                            | -6.98969600 | -1.31508700 | 0.24944700                  |
| H                                            | -6.88517700 | -0.30648200 | 0.65949400                  |
| H                                            | -7.44943200 | -1.95443200 | 1.00309000                  |
| H                                            | -9.38400200 | -2.10337300 | -2.14695700                 |
| O                                            | -5.63869400 | -1.89085700 | 0.10407700                  |
| Zero-point correction=                       |             |             | 0.690589 (Hartree/Particle) |
| Thermal correction to Energy=                |             |             | 0.732008                    |
| Thermal correction to Enthalpy=              |             |             | 0.732953                    |
| Thermal correction to Gibbs Free Energy=     |             |             | 0.614920                    |
| Sum of electronic and zero-point Energies=   |             |             | -1871.898833                |
| Sum of electronic and thermal Energies=      |             |             | -1871.857414                |
| Sum of electronic and thermal Enthalpies=    |             |             | -1871.856470                |
| Sum of electronic and thermal Free Energies= |             |             | -1871.974502                |

E(RB3LYP) = -1873.25570566 A.U.

D-TS2

1 1

|    |             |             |             |
|----|-------------|-------------|-------------|
| C  | -1.19028700 | 1.13009800  | -0.50560800 |
| C  | -1.06250300 | 1.61404500  | -1.90582000 |
| O  | -1.71233800 | 1.04606500  | -2.81280900 |
| O  | -0.22529900 | 2.60701000  | -2.17930300 |
| C  | -0.08450200 | 2.97293900  | -3.57324400 |
| H  | -1.05303100 | 3.24864900  | -3.99334900 |
| H  | 0.59603200  | 3.82266600  | -3.57665500 |
| H  | 0.33489100  | 2.13864700  | -4.13882100 |
| C  | -1.21456800 | 2.09856500  | 0.66492800  |
| C  | -0.92619900 | 3.47031500  | 0.56265400  |
| C  | -1.55406800 | 1.59692300  | 1.93800500  |
| C  | -0.97487100 | 4.29785300  | 1.68748100  |
| H  | -0.66000200 | 3.90023900  | -0.39378500 |
| C  | -1.60563500 | 2.42507500  | 3.05653600  |
| H  | -1.77855000 | 0.53955400  | 2.05229700  |
| C  | -1.31373300 | 3.78583600  | 2.93886700  |
| H  | -0.75144200 | 5.35500700  | 1.57536000  |
| H  | -1.87289200 | 2.00502900  | 4.02205800  |
| H  | -1.35213900 | 4.43461000  | 3.80830500  |
| P  | 2.90602700  | -0.82260400 | 0.15840700  |
| Au | 0.74569500  | 0.11511800  | -0.25023900 |
| C  | 3.30801000  | -2.13125200 | -1.21175400 |
| C  | 2.04020800  | -2.97571700 | -1.48573500 |
| C  | 3.63011800  | -1.40969500 | -2.53894400 |
| C  | 4.48184200  | -3.06783100 | -0.85724700 |
| H  | 1.69848900  | -3.54621200 | -0.62396200 |
| H  | 1.21432800  | -2.34886400 | -1.83481500 |
| H  | 2.27274600  | -3.69257000 | -2.28162000 |
| H  | 4.58506600  | -0.88280800 | -2.52098700 |
| H  | 3.69509000  | -2.16573400 | -3.32932400 |
| H  | 2.84157900  | -0.70675500 | -2.82346300 |
| H  | 4.66908800  | -3.72921700 | -1.71117700 |
| H  | 5.40948200  | -2.52746300 | -0.65773900 |
| H  | 4.26654900  | -3.70886800 | -0.00008000 |
| C  | 4.18201900  | 0.63388300  | 0.11244800  |
| C  | 3.84913800  | 1.55746400  | -1.08493100 |
| C  | 4.01609700  | 1.50017600  | 1.38049100  |
| C  | 5.65147500  | 0.17567300  | 0.00701200  |
| H  | 3.96512900  | 1.07501900  | -2.05384300 |
| H  | 2.83240400  | 1.95559700  | -1.01870000 |

|                                          |             |             |                             |
|------------------------------------------|-------------|-------------|-----------------------------|
| H                                        | 4.54066700  | 2.40757700  | -1.05932400                 |
| H                                        | 4.36447700  | 1.00296900  | 2.28689600                  |
| H                                        | 4.62513200  | 2.40238100  | 1.25638000                  |
| H                                        | 2.98090300  | 1.82285300  | 1.52647900                  |
| H                                        | 6.29588100  | 1.06136900  | 0.04796400                  |
| H                                        | 5.95051400  | -0.48048000 | 0.82630200                  |
| H                                        | 5.86670300  | -0.33196300 | -0.93517600                 |
| C                                        | 2.88303000  | -1.65480400 | 1.90846600                  |
| C                                        | 2.10889800  | -0.74412800 | 2.89228600                  |
| C                                        | 2.09044700  | -2.97841200 | 1.83925600                  |
| C                                        | 4.28669700  | -1.94034300 | 2.48107700                  |
| H                                        | 2.58577100  | 0.21863200  | 3.06359900                  |
| H                                        | 1.08522100  | -0.55838700 | 2.55474800                  |
| H                                        | 2.05321700  | -1.25816000 | 3.85891200                  |
| H                                        | 2.59936400  | -3.75692600 | 1.26978300                  |
| H                                        | 1.96792800  | -3.35509300 | 2.86074800                  |
| H                                        | 1.08898100  | -2.83228600 | 1.42293400                  |
| H                                        | 4.17392400  | -2.46992100 | 3.43410500                  |
| H                                        | 4.89102400  | -2.57200700 | 1.82794800                  |
| H                                        | 4.84694900  | -1.02680000 | 2.68930400                  |
| C                                        | -8.88630700 | -2.32107400 | -0.59867400                 |
| H                                        | -9.25080800 | -3.05396700 | 0.11685600                  |
| C                                        | -7.80425200 | -1.58135700 | -0.35720600                 |
| H                                        | -7.46375600 | -0.85606500 | -1.09393500                 |
| C                                        | -4.68533900 | -1.35073500 | 0.30446200                  |
| C                                        | -4.82724400 | 0.04198900  | 0.06641200                  |
| C                                        | -3.41875200 | -1.97297800 | 0.13682400                  |
| C                                        | -3.72793700 | 0.77355800  | -0.30768600                 |
| H                                        | -5.78494800 | 0.53205700  | 0.18762000                  |
| C                                        | -2.33283900 | -1.23182800 | -0.24589500                 |
| H                                        | -3.34711500 | -3.03723500 | 0.33227000                  |
| C                                        | -2.42909800 | 0.17932600  | -0.56031900                 |
| H                                        | -3.83671400 | 1.84186000  | -0.47241200                 |
| H                                        | -1.36650700 | -1.71256900 | -0.36687100                 |
| H                                        | -2.42155100 | 0.21693400  | -1.79979900                 |
| C                                        | -7.02317700 | -1.67813400 | 0.91761100                  |
| H                                        | -6.96990400 | -0.72761200 | 1.45910400                  |
| H                                        | -7.44977100 | -2.42910600 | 1.58356300                  |
| H                                        | -9.45397800 | -2.21356700 | -1.51741100                 |
| O                                        | -5.66046300 | -2.15917900 | 0.68736100                  |
| Zero-point correction=                   |             |             | 0.687308 (Hartree/Particle) |
| Thermal correction to Energy=            |             |             | 0.728079                    |
| Thermal correction to Enthalpy=          |             |             | 0.729023                    |
| Thermal correction to Gibbs Free Energy= |             |             | 0.612877                    |

|                                              |                          |
|----------------------------------------------|--------------------------|
| Sum of electronic and zero-point Energies=   | -1871.902023             |
| Sum of electronic and thermal Energies=      | -1871.861253             |
| Sum of electronic and thermal Enthalpies=    | -1871.860309             |
| Sum of electronic and thermal Free Energies= | -1871.976454             |
| E(RB3LYP) =                                  | -1873.24776488      A.U. |

D-2

1 1

|    |             |             |             |
|----|-------------|-------------|-------------|
| C  | 1.28993100  | 1.16639400  | 0.49131500  |
| C  | 1.11893700  | 1.36464700  | 1.89465000  |
| O  | 1.70297500  | 0.59885200  | 2.80182600  |
| O  | 0.37675600  | 2.33017900  | 2.39186300  |
| C  | 0.15900500  | 2.39477400  | 3.82524100  |
| H  | 1.10953300  | 2.49861200  | 4.34976600  |
| H  | -0.46011100 | 3.27789700  | 3.96962300  |
| H  | -0.36179400 | 1.49771200  | 4.16607100  |
| C  | 1.09329800  | 2.30818800  | -0.48806400 |
| C  | 1.01351700  | 3.66140500  | -0.12187300 |
| C  | 1.04919700  | 1.99397500  | -1.86176400 |
| C  | 0.87669300  | 4.65663600  | -1.09221600 |
| H  | 1.06325900  | 3.95175900  | 0.91946000  |
| C  | 0.91558000  | 2.98882100  | -2.82722900 |
| H  | 1.13983100  | 0.95684800  | -2.17203600 |
| C  | 0.82284400  | 4.32937800  | -2.44645700 |
| H  | 0.82250200  | 5.69575700  | -0.78122000 |
| H  | 0.88849400  | 2.71570100  | -3.87799200 |
| H  | 0.71943600  | 5.10770100  | -3.19600000 |
| P  | -2.85325800 | -0.85176500 | -0.20720600 |
| Au | -0.73263000 | 0.11996100  | 0.24358600  |
| C  | -2.78699800 | -2.72546400 | 0.27892300  |
| C  | -1.44413400 | -3.32668000 | -0.19932100 |
| C  | -2.79447900 | -2.86322700 | 1.81722700  |
| C  | -3.95115700 | -3.55645600 | -0.30175600 |
| H  | -1.31636300 | -3.31733100 | -1.27997100 |
| H  | -0.59295800 | -2.80760600 | 0.24933900  |
| H  | -1.40426500 | -4.37239200 | 0.12614400  |
| H  | -3.74964000 | -2.59176300 | 2.26887600  |
| H  | -2.61229700 | -3.91527700 | 2.06279500  |
| H  | -1.99894900 | -2.27671500 | 2.28697100  |
| H  | -3.86717100 | -4.58096800 | 0.07815700  |
| H  | -4.93204100 | -3.18102300 | -0.00444600 |
| H  | -3.92105100 | -3.61752000 | -1.39114700 |
| C  | -4.16402700 | 0.09432300  | 0.85904500  |
| C  | -3.59494500 | 0.32388300  | 2.27964900  |

|   |             |             |             |
|---|-------------|-------------|-------------|
| C | -4.39888000 | 1.49823600  | 0.25969600  |
| C | -5.51755900 | -0.63937300 | 0.96355300  |
| H | -3.40386100 | -0.59532000 | 2.83027100  |
| H | -2.66885500 | 0.90552300  | 2.24768100  |
| H | -4.33156600 | 0.90050300  | 2.85053700  |
| H | -4.93581400 | 1.47475800  | -0.68918400 |
| H | -5.01753400 | 2.06663500  | 0.96287400  |
| H | -3.46442000 | 2.05106100  | 0.12504400  |
| H | -6.21080800 | -0.00801500 | 1.53094500  |
| H | -5.97371200 | -0.82777100 | -0.01007400 |
| H | -5.44093400 | -1.58862000 | 1.49666900  |
| C | -3.21655100 | -0.64109400 | -2.09728300 |
| C | -2.79872200 | 0.77998900  | -2.54589300 |
| C | -2.33628400 | -1.62374800 | -2.90080000 |
| C | -4.69620700 | -0.87700200 | -2.46627600 |
| H | -3.38700700 | 1.57451500  | -2.09088300 |
| H | -1.74299300 | 0.97967400  | -2.34306900 |
| H | -2.94586800 | 0.84763600  | -3.62976200 |
| H | -2.63025900 | -2.66634600 | -2.77384200 |
| H | -2.44975600 | -1.38649100 | -3.96418800 |
| H | -1.27491000 | -1.52192100 | -2.65544200 |
| H | -4.79491600 | -0.81279500 | -3.55574700 |
| H | -5.05900800 | -1.86144100 | -2.16530300 |
| H | -5.35930400 | -0.12106600 | -2.04183600 |
| C | 9.06324300  | -1.84319200 | 0.26803200  |
| H | 9.44775300  | -2.71731100 | -0.25209500 |
| C | 7.86160900  | -1.33749500 | -0.00744500 |
| H | 7.50272700  | -0.46390300 | 0.53409000  |
| C | 4.68923100  | -1.44827900 | -0.31248900 |
| C | 4.76478000  | -0.06411700 | -0.54429700 |
| C | 3.48565200  | -1.98779000 | 0.16982400  |
| C | 3.65965000  | 0.74768100  | -0.29958100 |
| H | 5.67899900  | 0.39260200  | -0.90352600 |
| C | 2.38769700  | -1.16551700 | 0.40010400  |
| H | 3.42930500  | -3.05814300 | 0.33667700  |
| C | 2.44419000  | 0.22544900  | 0.17353700  |
| H | 3.74500000  | 1.81396600  | -0.48384000 |
| H | 1.45762600  | -1.61606500 | 0.73877700  |
| H | 2.30522900  | -0.02290400 | 2.34163800  |
| C | 6.95263800  | -1.90336800 | -1.06054200 |
| H | 6.77424000  | -1.19052300 | -1.87633900 |
| H | 7.38795600  | -2.80550600 | -1.49575400 |
| H | 9.71150700  | -1.39904400 | 1.01692400  |
| O | 5.68463400  | -2.33795000 | -0.52317800 |



|                                              |                             |
|----------------------------------------------|-----------------------------|
| Zero-point correction=                       | 0.692107 (Hartree/Particle) |
| Thermal correction to Energy=                | 0.733355                    |
| Thermal correction to Enthalpy=              | 0.734300                    |
| Thermal correction to Gibbs Free Energy=     | 0.616786                    |
| Sum of electronic and zero-point Energies=   | -1871.930823                |
| Sum of electronic and thermal Energies=      | -1871.889575                |
| Sum of electronic and thermal Enthalpies=    | -1871.888631                |
| Sum of electronic and thermal Free Energies= | -1872.006144                |
| E(RB3LYP) =                                  | -1873.28405525 A.U.         |

D-TS3

0 1

|   |             |             |             |
|---|-------------|-------------|-------------|
| C | -1.03388600 | -0.20940200 | -0.26187800 |
| C | -1.63377400 | -1.35852500 | -0.84936400 |
| O | -2.85176900 | -1.54872400 | -1.13987500 |
| O | -0.77597700 | -2.39729000 | -1.06970600 |
| C | -1.35584100 | -3.61249700 | -1.53997700 |
| H | -1.85780000 | -3.46963300 | -2.50074700 |
| H | -0.52243700 | -4.30788900 | -1.65087300 |
| H | -2.08403800 | -4.01402000 | -0.82740900 |
| H | -4.04919200 | -1.00006100 | -0.49967100 |
| O | -1.98836200 | -0.40834700 | 2.32283800  |
| H | -1.93181100 | 0.53514600  | 2.53728000  |
| H | -1.62282900 | -0.45324800 | 1.33066700  |
| O | -4.29182900 | -1.14211200 | 2.33860600  |
| H | -4.31785100 | -2.07831200 | 2.57737600  |
| H | -3.19278800 | -0.78402400 | 2.35888300  |
| O | -4.92471500 | -0.78312800 | 0.01802200  |
| H | -5.61650000 | -1.33676700 | -0.36518100 |
| H | -4.65753700 | -1.01361500 | 1.30365000  |
| C | -1.69451700 | 1.12422000  | -0.36567300 |
| C | -1.26476200 | 2.17609700  | 0.47914500  |
| C | -2.75103200 | 1.42007500  | -1.25188200 |
| C | -1.86019700 | 3.43523500  | 0.44888900  |
| H | -0.42368000 | 2.00396300  | 1.14657800  |
| C | -3.34596100 | 2.68087600  | -1.27896400 |
| H | -3.10158000 | 0.65229200  | -1.93016400 |
| C | -2.91357900 | 3.69920000  | -0.42863900 |
| H | -1.49493600 | 4.21477200  | 1.11294000  |
| H | -4.15419100 | 2.86861100  | -1.98137500 |
| H | -3.38151900 | 4.67881700  | -0.45375400 |
| C | 0.45784200  | -0.21969500 | -0.05424900 |
| C | 1.07477600  | -1.06308600 | 0.88914300  |
| C | 1.30041700  | 0.62070600  | -0.79489700 |

|                                              |                |             |                             |
|----------------------------------------------|----------------|-------------|-----------------------------|
| C                                            | 2.45113500     | -1.07502100 | 1.07406000                  |
| H                                            | 0.45927400     | -1.72825100 | 1.48769200                  |
| C                                            | 2.68658900     | 0.63256800  | -0.61741400                 |
| H                                            | 0.86325300     | 1.28688700  | -1.53275200                 |
| C                                            | 3.27033300     | -0.22250300 | 0.32259000                  |
| H                                            | 2.91599700     | -1.73084100 | 1.80344400                  |
| H                                            | 3.29124800     | 1.29902100  | -1.22140400                 |
| C                                            | 5.49112900     | 0.56977800  | -0.12548000                 |
| H                                            | 5.18251900     | 1.61457000  | 0.04099700                  |
| H                                            | 5.44629100     | 0.37742600  | -1.20679500                 |
| C                                            | 6.87980200     | 0.35275200  | 0.39553600                  |
| H                                            | 6.98366900     | 0.40388800  | 1.47811700                  |
| C                                            | 7.94378000     | 0.14002200  | -0.37607700                 |
| H                                            | 8.93863100     | 0.02634400  | 0.04333400                  |
| H                                            | 7.86077000     | 0.07535000  | -1.45833100                 |
| O                                            | 4.61434200     | -0.30355200 | 0.58240200                  |
| Zero-point correction=                       |                |             | 0.386279 (Hartree/Particle) |
| Thermal correction to Energy=                |                |             | 0.412232                    |
| Thermal correction to Enthalpy=              |                |             | 0.413176                    |
| Thermal correction to Gibbs Free Energy=     |                |             | 0.327100                    |
| Sum of electronic and zero-point Energies=   |                |             | -1151.297977                |
| Sum of electronic and thermal Energies=      |                |             | -1151.272024                |
| Sum of electronic and thermal Enthalpies=    |                |             | -1151.271080                |
| Sum of electronic and thermal Free Energies= |                |             | -1151.357155                |
| E(RB3LYP) =                                  | -1152.13264045 | A.U.        |                             |

#### C-P3

|   |             |             |             |
|---|-------------|-------------|-------------|
| C | -0.33568500 | 0.12368900  | 0.26897700  |
| C | -0.12153900 | 1.10488900  | -0.90945100 |
| O | -0.16601100 | 2.31375100  | -0.82444600 |
| O | 0.09995700  | 0.43907500  | -2.05253100 |
| C | 0.31293700  | 1.25904000  | -3.21499700 |
| H | 1.19210000  | 1.89324600  | -3.07850900 |
| H | 0.46713500  | 0.56271600  | -4.03817800 |
| H | -0.55730500 | 1.89237800  | -3.40226600 |
| C | -1.69036400 | -0.57357200 | 0.07331600  |
| C | -2.80277200 | 0.15736900  | -0.36631800 |
| C | -1.84639200 | -1.93038400 | 0.37493300  |
| C | -4.04541600 | -0.45971000 | -0.50629700 |
| H | -2.70078600 | 1.21424600  | -0.59321400 |
| C | -3.09185600 | -2.54478700 | 0.23518200  |
| H | -0.98990200 | -2.50384900 | 0.70632100  |
| C | -4.19489800 | -1.81426700 | -0.20612500 |

|                                              |                |             |                             |
|----------------------------------------------|----------------|-------------|-----------------------------|
| H                                            | -4.89590400    | 0.12070600  | -0.85186100                 |
| H                                            | -3.19631200    | -3.60020900 | 0.47006100                  |
| H                                            | -5.16200400    | -2.29577800 | -0.31722400                 |
| C                                            | -1.45173800    | 2.98830100  | 2.19800300                  |
| H                                            | -0.57416500    | 3.58250500  | 1.95945700                  |
| C                                            | -1.45602000    | 1.66249400  | 2.06563700                  |
| H                                            | -2.36193500    | 1.10781200  | 2.30107200                  |
| C                                            | 1.99954100     | -0.71065400 | 0.25524200                  |
| C                                            | 2.76015300     | -1.88280600 | 0.37658500                  |
| C                                            | 2.64710000     | 0.52672600  | 0.15644000                  |
| C                                            | 4.14867100     | -1.81864200 | 0.40045300                  |
| H                                            | 2.23833900     | -2.83147400 | 0.44656800                  |
| C                                            | 4.04465500     | 0.57387100  | 0.18340300                  |
| H                                            | 2.09316100     | 1.45119600  | 0.05924400                  |
| C                                            | 4.80345200     | -0.58709200 | 0.30546100                  |
| H                                            | 4.72212100     | -2.73629700 | 0.49509000                  |
| H                                            | 4.53577700     | 1.53988200  | 0.10807600                  |
| H                                            | 5.88737700     | -0.53639000 | 0.32697500                  |
| C                                            | -0.26207400    | 0.84207300  | 1.65183000                  |
| H                                            | -0.12261800    | 0.02846800  | 2.37440700                  |
| H                                            | 0.63469800     | 1.46330300  | 1.68653900                  |
| H                                            | -2.33129200    | 3.52720400  | 2.53791200                  |
| O                                            | 0.64292700     | -0.92518900 | 0.22146400                  |
| Zero-point correction=                       |                |             | 0.317962 (Hartree/Particle) |
| Thermal correction to Energy=                |                |             | 0.337512                    |
| Thermal correction to Enthalpy=              |                |             | 0.338456                    |
| Thermal correction to Gibbs Free Energy=     |                |             | 0.268265                    |
| Sum of electronic and zero-point Energies=   |                |             | -922.098983                 |
| Sum of electronic and thermal Energies=      |                |             | -922.079433                 |
| Sum of electronic and thermal Enthalpies=    |                |             | -922.078488                 |
| Sum of electronic and thermal Free Energies= |                |             | -922.148680                 |
| E(RB3LYP) =                                  | -922.747665195 | A.U.        |                             |

#### D-P2

|   |             |             |             |
|---|-------------|-------------|-------------|
| C | -1.54847200 | 0.23088800  | -0.42708400 |
| C | -1.49328200 | 1.66268600  | 0.04510900  |
| O | -2.15880300 | 2.10858400  | 0.95469100  |
| O | -0.60994000 | 2.42125300  | -0.65357500 |
| C | -0.51427300 | 3.79192300  | -0.22748700 |
| H | -0.20707500 | 3.85164500  | 0.81930200  |
| H | 0.23411300  | 4.24807600  | -0.87498200 |
| H | -1.47793300 | 4.29387100  | -0.33922000 |
| C | -2.83781700 | -0.46446600 | -0.06519100 |
| C | -3.06131900 | -0.91592600 | 1.24180300  |

|                                              |                |             |                             |
|----------------------------------------------|----------------|-------------|-----------------------------|
| C                                            | -3.83976400    | -0.65176500 | -1.02362700                 |
| C                                            | -4.25542000    | -1.54996800 | 1.57978000                  |
| H                                            | -2.29489700    | -0.76402700 | 1.99575300                  |
| C                                            | -5.03704800    | -1.28653200 | -0.68808000                 |
| H                                            | -3.68205200    | -0.29749400 | -2.03848100                 |
| C                                            | -5.24689100    | -1.73874200 | 0.61438700                  |
| H                                            | -4.41290400    | -1.89652800 | 2.59704400                  |
| H                                            | -5.80383000    | -1.42633300 | -1.44464000                 |
| H                                            | -6.17656700    | -2.23518400 | 0.87685500                  |
| C                                            | -0.82535200    | -0.16762200 | -1.70327600                 |
| H                                            | -0.29838300    | 0.61604200  | -2.23509900                 |
| C                                            | -0.26491400    | -0.61856000 | -0.39148000                 |
| H                                            | -0.45524200    | -1.65519200 | -0.12471400                 |
| C                                            | 3.36978600     | -0.70171100 | -0.09247400                 |
| C                                            | 3.79305400     | 0.30652000  | 0.78183900                  |
| C                                            | 4.31361800     | -1.56083200 | -0.67524200                 |
| C                                            | 5.15600200     | 0.44375300  | 1.06445000                  |
| H                                            | 3.08156500     | 0.98173800  | 1.24169400                  |
| C                                            | 5.66428100     | -1.41027300 | -0.38452800                 |
| H                                            | 3.96079500     | -2.33437500 | -1.34941500                 |
| C                                            | 6.09668800     | -0.40617500 | 0.48872900                  |
| H                                            | 5.47592700     | 1.22833900  | 1.74447000                  |
| H                                            | 6.38538100     | -2.08172400 | -0.84198200                 |
| H                                            | 7.15207800     | -0.29139700 | 0.71464000                  |
| C                                            | 1.05284500     | -0.10940400 | 0.13555400                  |
| H                                            | 1.21034700     | 0.93969100  | -0.13559000                 |
| H                                            | 1.08693700     | -0.19344700 | 1.23155200                  |
| H                                            | -1.30992000    | -0.90677100 | -2.33218600                 |
| O                                            | 2.06891000     | -0.92979800 | -0.44412800                 |
| Zero-point correction=                       |                |             | 0.319784 (Hartree/Particle) |
| Thermal correction to Energy=                |                |             | 0.338786                    |
| Thermal correction to Enthalpy=              |                |             | 0.339730                    |
| Thermal correction to Gibbs Free Energy=     |                |             | 0.268988                    |
| Sum of electronic and zero-point Energies=   |                |             | -922.102463                 |
| Sum of electronic and thermal Energies=      |                |             | -922.083462                 |
| Sum of electronic and thermal Enthalpies=    |                |             | -922.082517                 |
| Sum of electronic and thermal Free Energies= |                |             | -922.153260                 |
| E(RB3LYP) =                                  | -922.749578281 | A.U.        |                             |
| E-re2                                        |                |             |                             |
| 0 1                                          |                |             |                             |
| C                                            | -1.91299500    | -0.52768800 | 0.39560000                  |
| H                                            | -1.68600000    | -1.58072400 | 0.56429500                  |
| C                                            | -0.88735700    | 0.33853000  | 0.39597900                  |
| H                                            | -1.05760200    | 1.39991500  | 0.22715100                  |

|                                              |                |             |                             |
|----------------------------------------------|----------------|-------------|-----------------------------|
| S                                            | 1.49021600     | 0.17906100  | -0.98675300                 |
| C                                            | 3.17910900     | 0.06567600  | -0.38080900                 |
| C                                            | 3.80017900     | 1.17383600  | 0.21218400                  |
| C                                            | 3.89808800     | -1.12710300 | -0.53249300                 |
| C                                            | 5.11796900     | 1.08314700  | 0.66061500                  |
| H                                            | 3.24973300     | 2.10436900  | 0.31134100                  |
| C                                            | 5.21984100     | -1.21089600 | -0.09157900                 |
| H                                            | 3.41809800     | -1.98177500 | -0.99835600                 |
| C                                            | 5.83006200     | -0.10845400 | 0.50836700                  |
| H                                            | 5.59163400     | 1.94609900  | 1.11982200                  |
| H                                            | 5.77111500     | -2.13862000 | -0.21525100                 |
| H                                            | 6.85810700     | -0.17547800 | 0.85214300                  |
| C                                            | 0.53534500     | -0.06674600 | 0.59989200                  |
| H                                            | 1.02218600     | 0.55575100  | 1.35721000                  |
| H                                            | 0.61374300     | -1.11435900 | 0.90178800                  |
| C                                            | -3.33946900    | -0.23023900 | 0.20567000                  |
| C                                            | -3.82793100    | 1.05313100  | -0.10446900                 |
| C                                            | -4.27067500    | -1.27540900 | 0.33602300                  |
| C                                            | -5.19084200    | 1.27678300  | -0.27086100                 |
| H                                            | -3.13647700    | 1.88141300  | -0.22340100                 |
| C                                            | -5.63632200    | -1.05242500 | 0.16973300                  |
| H                                            | -3.91303700    | -2.27448600 | 0.57207300                  |
| C                                            | -6.10319000    | 0.22628400  | -0.13384200                 |
| H                                            | -5.54507700    | 2.27501400  | -0.51179200                 |
| H                                            | -6.33456600    | -1.87754000 | 0.27661200                  |
| H                                            | -7.16618900    | 0.40488000  | -0.26566100                 |
| Zero-point correction=                       |                |             | 0.244241 (Hartree/Particle) |
| Thermal correction to Energy=                |                |             | 0.258733                    |
| Thermal correction to Enthalpy=              |                |             | 0.259677                    |
| Thermal correction to Gibbs Free Energy=     |                |             | 0.197915                    |
| Sum of electronic and zero-point Energies=   |                |             | -977.978378                 |
| Sum of electronic and thermal Energies=      |                |             | -977.963885                 |
| Sum of electronic and thermal Enthalpies=    |                |             | -977.962941                 |
| Sum of electronic and thermal Free Energies= |                |             | -978.024703                 |
| E(RB3LYP) =                                  | -978.463153830 | A.U.        |                             |

E-tsa1-s

|     |             |             |             |
|-----|-------------|-------------|-------------|
| 1 1 |             |             |             |
| C   | -1.12779800 | -1.10636000 | -0.48918500 |
| C   | -0.59494600 | -1.17851900 | -1.84527400 |
| O   | 0.47287800  | -1.68875400 | -2.16784200 |
| O   | -1.40396100 | -0.57630900 | -2.78225300 |
| C   | -0.87173500 | -0.51806800 | -4.11563900 |
| H   | -0.62977700 | -1.51828300 | -4.48099000 |

|    |             |             |             |
|----|-------------|-------------|-------------|
| H  | -1.65479000 | -0.06627100 | -4.72472800 |
| H  | 0.03222900  | 0.09616600  | -4.14477500 |
| C  | -0.73958400 | -2.16940600 | 0.48870700  |
| C  | -0.61421600 | -3.51615400 | 0.10143000  |
| C  | -0.50695900 | -1.84902200 | 1.83751200  |
| C  | -0.27193300 | -4.50178600 | 1.02821700  |
| H  | -0.75642400 | -3.78800800 | -0.93970300 |
| C  | -0.17694200 | -2.83380300 | 2.76914900  |
| H  | -0.58873000 | -0.81218400 | 2.15172500  |
| C  | -0.05813400 | -4.16618700 | 2.36713000  |
| H  | -0.17225200 | -5.53341600 | 0.70329200  |
| H  | -0.00955600 | -2.55966500 | 3.80702400  |
| H  | 0.20432100  | -4.93482900 | 3.08801400  |
| P  | 0.46003500  | 3.40993900  | -0.19798700 |
| Au | 0.62129800  | 1.03730600  | -0.13448900 |
| C  | 0.84227300  | 4.06158600  | 1.59000600  |
| C  | 0.13250900  | 3.14923600  | 2.61937500  |
| C  | 2.35323700  | 3.92985200  | 1.88041000  |
| C  | 0.41908600  | 5.52673200  | 1.82787500  |
| H  | -0.95335500 | 3.15967900  | 2.54172300  |
| H  | 0.47340900  | 2.11315800  | 2.53366900  |
| H  | 0.39265300  | 3.50189700  | 3.62411900  |
| H  | 2.96378600  | 4.62723500  | 1.30486300  |
| H  | 2.51403000  | 4.16385500  | 2.93883800  |
| H  | 2.71701700  | 2.91232900  | 1.71537700  |
| H  | 0.74224600  | 5.82169300  | 2.83289300  |
| H  | 0.88053000  | 6.22078600  | 1.12315300  |
| H  | -0.66263900 | 5.66730000  | 1.78871300  |
| C  | 1.76722000  | 4.09811300  | -1.45856100 |
| C  | 3.08825600  | 3.31000900  | -1.30560300 |
| C  | 1.28382100  | 3.83667700  | -2.90216500 |
| C  | 2.05671100  | 5.60579700  | -1.29621800 |
| H  | 3.55421000  | 3.42620600  | -0.32893800 |
| H  | 2.93292500  | 2.24323900  | -1.48714600 |
| H  | 3.79653500  | 3.68094600  | -2.05548500 |
| H  | 0.43986800  | 4.46331600  | -3.19248900 |
| H  | 2.10766400  | 4.07412000  | -3.58439300 |
| H  | 1.01906900  | 2.78733800  | -3.06260000 |
| H  | 2.75220700  | 5.91177300  | -2.08637000 |
| H  | 1.16281200  | 6.22382600  | -1.39476600 |
| H  | 2.53349200  | 5.84216800  | -0.34331600 |
| C  | -1.31692000 | 3.95467500  | -0.74726100 |
| C  | -1.77149800 | 3.06708800  | -1.92980200 |
| C  | -2.29847000 | 3.67587500  | 0.40940200  |

|   |             |             |             |
|---|-------------|-------------|-------------|
| C | -1.43595400 | 5.43814400  | -1.15314200 |
| H | -1.20193800 | 3.23925500  | -2.84127100 |
| H | -1.71483800 | 2.00267800  | -1.69020400 |
| H | -2.81813700 | 3.30621000  | -2.15264600 |
| H | -2.17598600 | 4.35863200  | 1.25125600  |
| H | -3.31880000 | 3.81203200  | 0.03205000  |
| H | -2.20920500 | 2.64930000  | 0.77319600  |
| H | -2.48885100 | 5.65526100  | -1.36791800 |
| H | -1.11737900 | 6.12170800  | -0.36469500 |
| H | -0.87339800 | 5.67119900  | -2.05858500 |
| C | -6.22597600 | -2.38880300 | -0.70234000 |
| H | -5.89050800 | -3.13164400 | 0.02163400  |
| C | -5.28668600 | -1.77929700 | -1.45078100 |
| H | -5.56465200 | -1.03037200 | -2.18871800 |
| S | -2.87653800 | -0.63453500 | -0.53268900 |
| C | -3.55567900 | -0.67260800 | 1.13387800  |
| C | -4.11926800 | 0.52509200  | 1.58664200  |
| C | -3.62853000 | -1.83434600 | 1.91265900  |
| C | -4.73230600 | 0.57052000  | 2.84000600  |
| H | -4.09544300 | 1.40799100  | 0.95817600  |
| C | -4.24828200 | -1.77786600 | 3.16052700  |
| H | -3.20255500 | -2.76735500 | 1.56541400  |
| C | -4.79410600 | -0.57926400 | 3.62725600  |
| H | -5.17105800 | 1.49928000  | 3.19067800  |
| H | -4.30371000 | -2.67511300 | 3.76891900  |
| H | -5.27617100 | -0.54626000 | 4.59943100  |
| C | -3.83869500 | -2.07855900 | -1.33841700 |
| H | -3.61581300 | -2.96965400 | -0.74900600 |
| H | -3.33707100 | -2.13915600 | -2.30649800 |
| C | 5.80556700  | -1.84979200 | -1.24204200 |
| H | 6.15069000  | -0.81532300 | -1.23087300 |
| C | 4.48127800  | -2.06647500 | -1.32218700 |
| H | 4.07980700  | -3.07688200 | -1.33664800 |
| S | 2.38987100  | -0.93798000 | 0.13402500  |
| C | 3.53061800  | -0.45137200 | 1.43811800  |
| C | 3.47704000  | -1.18197200 | 2.63157200  |
| C | 4.44091800  | 0.60526800  | 1.30846300  |
| C | 4.31814000  | -0.84398500 | 3.69379200  |
| H | 2.78669700  | -2.01497200 | 2.71935600  |
| C | 5.29239000  | 0.92329800  | 2.36729800  |
| H | 4.49335300  | 1.17499500  | 0.38690500  |
| C | 5.22924700  | 0.20478900  | 3.56368400  |
| H | 4.27231100  | -1.41495300 | 4.61636500  |
| H | 6.00531100  | 1.73538600  | 2.25724500  |

|                                              |                |             |                             |
|----------------------------------------------|----------------|-------------|-----------------------------|
| H                                            | 5.89237600     | 0.45681800  | 4.38547500                  |
| C                                            | 3.47453800     | -0.97136500 | -1.39272600                 |
| H                                            | 3.93712000     | 0.00857800  | -1.53062300                 |
| H                                            | 2.72778800     | -1.13523700 | -2.17335600                 |
| C                                            | 6.87668600     | -2.85203600 | -1.18220300                 |
| C                                            | 8.21190800     | -2.41184900 | -1.15607100                 |
| C                                            | 6.63446700     | -4.23876500 | -1.14762700                 |
| C                                            | 9.26928600     | -3.31831400 | -1.09932300                 |
| H                                            | 8.41841200     | -1.34466500 | -1.18185000                 |
| C                                            | 7.68920200     | -5.14397500 | -1.09079400                 |
| H                                            | 5.61541400     | -4.61273700 | -1.16322600                 |
| C                                            | 9.01162000     | -4.68905800 | -1.06674500                 |
| H                                            | 10.29240800    | -2.95460600 | -1.08102800                 |
| H                                            | 7.48188700     | -6.20982200 | -1.06482400                 |
| H                                            | 9.83200400     | -5.39904500 | -1.02276200                 |
| C                                            | -7.67743900    | -2.19113500 | -0.74391300                 |
| C                                            | -8.31129900    | -1.29133800 | -1.62288000                 |
| C                                            | -8.48086600    | -2.93805600 | 0.13679900                  |
| C                                            | -9.69446600    | -1.14642400 | -1.61441300                 |
| H                                            | -7.72178400    | -0.70465000 | -2.32078000                 |
| C                                            | -9.86668200    | -2.79251500 | 0.14588200                  |
| H                                            | -8.00861100    | -3.64038600 | 0.81914500                  |
| C                                            | -10.47842200   | -1.89533800 | -0.73013600                 |
| H                                            | -10.16663700   | -0.44974500 | -2.30069300                 |
| H                                            | -10.46754100   | -3.37997400 | 0.83348900                  |
| H                                            | -11.55804700   | -1.78024600 | -0.72848100                 |
| Zero-point correction=                       |                |             | 1.013851 (Hartree/Particle) |
| Thermal correction to Energy=                |                |             | 1.076301                    |
| Thermal correction to Enthalpy=              |                |             | 1.077245                    |
| Thermal correction to Gibbs Free Energy=     |                |             | 0.906936                    |
| Sum of electronic and zero-point Energies=   |                |             | -3403.824495                |
| Sum of electronic and thermal Energies=      |                |             | -3403.762044                |
| Sum of electronic and thermal Enthalpies=    |                |             | -3403.761100                |
| Sum of electronic and thermal Free Energies= |                |             | -3403.931409                |
| E(RB3LYP) =                                  | -3405.87706768 | A.U.        |                             |

E-1a

|     |             |             |             |
|-----|-------------|-------------|-------------|
| 1 1 |             |             |             |
| C   | -1.88060900 | -0.52596900 | 0.22985100  |
| C   | -2.27633800 | -1.90179200 | -0.25983100 |
| O   | -2.34359200 | -2.87795000 | 0.45708100  |
| O   | -2.48925300 | -1.95464900 | -1.59882900 |
| C   | -2.77087400 | -3.26680200 | -2.12878400 |



|    |             |             |             |
|----|-------------|-------------|-------------|
| H  | -3.66327900 | -3.68484500 | -1.65895700 |
| H  | -2.92729900 | -3.12212800 | -3.19710700 |
| H  | -1.92676100 | -3.93667800 | -1.95206000 |
| C  | -2.35771000 | -0.20690500 | 1.62603900  |
| C  | -3.58116000 | -0.70297200 | 2.11445900  |
| C  | -1.59530800 | 0.61340000  | 2.47748500  |
| C  | -4.01839300 | -0.39128600 | 3.40109600  |
| H  | -4.18342000 | -1.35844700 | 1.49624500  |
| C  | -2.03831800 | 0.93707200  | 3.76083800  |
| H  | -0.63474200 | 0.98420000  | 2.13154600  |
| C  | -3.25330700 | 0.43439900  | 4.22741100  |
| H  | -4.95873800 | -0.79896000 | 3.75966400  |
| H  | -1.42704800 | 1.56803600  | 4.39929800  |
| H  | -3.59583200 | 0.67388400  | 5.22943200  |
| P  | 2.59922100  | -1.31442800 | -0.05777900 |
| Au | 0.28515200  | -0.71941300 | 0.04519500  |
| C  | 3.49188000  | -0.63190800 | 1.51855400  |
| C  | 3.00950200  | 0.81421900  | 1.77816200  |
| C  | 3.05944800  | -1.45350200 | 2.75344200  |
| C  | 5.03163900  | -0.64805400 | 1.42214300  |
| H  | 3.27386800  | 1.51877700  | 0.99239300  |
| H  | 1.92509300  | 0.84854200  | 1.91680700  |
| H  | 3.47568000  | 1.16771800  | 2.70529000  |
| H  | 3.45851600  | -2.46835400 | 2.75498800  |
| H  | 3.45099300  | -0.95415500 | 3.64676100  |
| H  | 1.97124900  | -1.50113000 | 2.85565700  |
| H  | 5.44343200  | -0.29864800 | 2.37601600  |
| H  | 5.43474600  | -1.64659600 | 1.24268300  |
| H  | 5.41162300  | 0.01990900  | 0.64679300  |
| C  | 2.66681700  | -3.25204100 | -0.08850000 |
| C  | 1.63241600  | -3.81507600 | 0.91695400  |
| C  | 2.23272900  | -3.76367800 | -1.47962600 |
| C  | 4.06155800  | -3.82585600 | 0.23811900  |
| H  | 1.83608100  | -3.54725500 | 1.95187700  |
| H  | 0.61329100  | -3.49790300 | 0.67833200  |
| H  | 1.66096900  | -4.90898100 | 0.85349600  |
| H  | 2.96113900  | -3.55089500 | -2.26304600 |
| H  | 2.13253600  | -4.85319500 | -1.42235200 |
| H  | 1.26077000  | -3.36175600 | -1.78056000 |
| H  | 4.02523200  | -4.91522100 | 0.12252600  |
| H  | 4.83917800  | -3.45341200 | -0.43103300 |
| H  | 4.36891300  | -3.62585600 | 1.26636600  |
| C  | 3.38461500  | -0.57812700 | -1.66634100 |
| C  | 2.37665900  | -0.73797100 | -2.83002200 |

|                                 |             |             |                             |
|---------------------------------|-------------|-------------|-----------------------------|
| C                               | 3.59243200  | 0.94051700  | -1.48542200                 |
| C                               | 4.72953800  | -1.22297500 | -2.05996700                 |
| H                               | 2.17145200  | -1.77429300 | -3.09228700                 |
| H                               | 1.42467000  | -0.24870700 | -2.60336500                 |
| H                               | 2.79959600  | -0.25334700 | -3.71766900                 |
| H                               | 4.38752200  | 1.18376500  | -0.77947900                 |
| H                               | 3.88568100  | 1.36139800  | -2.45368600                 |
| H                               | 2.67667500  | 1.44997700  | -1.17411600                 |
| H                               | 5.12191100  | -0.69918000 | -2.93939900                 |
| H                               | 5.48232700  | -1.14415000 | -1.27321700                 |
| H                               | 4.62933100  | -2.27465200 | -2.33447800                 |
| C                               | 0.15704300  | 3.43182300  | 0.12647900                  |
| H                               | -0.11083400 | 3.37879300  | 1.18201400                  |
| C                               | -0.70754600 | 2.91340900  | -0.76437800                 |
| H                               | -0.49788100 | 2.94380700  | -1.83096900                 |
| S                               | -2.44259700 | 0.72225000  | -1.06129700                 |
| C                               | -4.24765300 | 0.77013600  | -1.09589000                 |
| C                               | -5.01376700 | 1.33043000  | -0.06549600                 |
| C                               | -4.85514400 | 0.22347200  | -2.23305700                 |
| C                               | -6.40364000 | 1.34322700  | -0.18724600                 |
| H                               | -4.54684000 | 1.74825800  | 0.81830400                  |
| C                               | -6.24589500 | 0.24085900  | -2.33778000                 |
| H                               | -4.24758000 | -0.20301600 | -3.02370900                 |
| C                               | -7.01835500 | 0.79984100  | -1.31767700                 |
| H                               | -7.00483000 | 1.77884000  | 0.60451900                  |
| H                               | -6.72305600 | -0.17562200 | -3.21913000                 |
| H                               | -8.10022200 | 0.81591500  | -1.40472700                 |
| C                               | -2.05544200 | 2.41040900  | -0.36846300                 |
| H                               | -2.19437800 | 2.38026900  | 0.71414000                  |
| H                               | -2.85304600 | 3.01381300  | -0.81460400                 |
| C                               | 1.42823900  | 4.11157600  | -0.14867000                 |
| C                               | 2.22481500  | 4.51301900  | 0.93946000                  |
| C                               | 1.88133000  | 4.40342300  | -1.45006600                 |
| C                               | 3.43735400  | 5.17109500  | 0.73922200                  |
| H                               | 1.88277600  | 4.31096200  | 1.95144400                  |
| C                               | 3.09129000  | 5.06090200  | -1.64975000                 |
| H                               | 1.27853700  | 4.13169800  | -2.31126100                 |
| C                               | 3.87529000  | 5.44607600  | -0.55690300                 |
| H                               | 4.03425100  | 5.47598300  | 1.59340000                  |
| H                               | 3.42103100  | 5.28542900  | -2.65970200                 |
| H                               | 4.81486600  | 5.96589300  | -0.71715400                 |
| Zero-point correction=          |             |             | 0.768655 (Hartree/Particle) |
| Thermal correction to Energy=   |             |             | 0.815407                    |
| Thermal correction to Enthalpy= |             |             | 0.816351                    |

|                                              |                         |
|----------------------------------------------|-------------------------|
| Thermal correction to Gibbs Free Energy=     | 0.686249                |
| Sum of electronic and zero-point Energies=   | -2425.881729            |
| Sum of electronic and thermal Energies=      | -2425.834977            |
| Sum of electronic and thermal Enthalpies=    | -2425.834033            |
| Sum of electronic and thermal Free Energies= | -2425.964135            |
| E(RB3LYP) =                                  | -2427.42167729      A.U |

E-tsa2

0 1

|   |             |             |             |
|---|-------------|-------------|-------------|
| C | 0.32852400  | 0.59292000  | -0.71144100 |
| C | -0.56389500 | 1.49689800  | -1.43707000 |
| O | -1.39583100 | 1.18534100  | -2.27743100 |
| O | -0.39739400 | 2.81409500  | -1.07557200 |
| C | -1.19724000 | 3.74499300  | -1.81064800 |
| H | -2.26268800 | 3.53733800  | -1.68039300 |
| H | -0.94799700 | 4.72766700  | -1.40805400 |
| H | -0.96618300 | 3.70364500  | -2.87864600 |
| C | 0.20952800  | -0.87159500 | -0.79566500 |
| C | -0.49366900 | -1.49972200 | -1.85212100 |
| C | 0.78724900  | -1.72073600 | 0.17708400  |
| C | -0.60563400 | -2.88583400 | -1.91827900 |
| H | -0.95989700 | -0.88365400 | -2.60715700 |
| C | 0.66957000  | -3.10658900 | 0.10278400  |
| H | 1.34244700  | -1.29706700 | 1.00413100  |
| C | -0.02742000 | -3.70463600 | -0.94713400 |
| H | -1.15349700 | -3.32880800 | -2.74574300 |
| H | 1.13153500  | -3.71972600 | 0.87214400  |
| H | -0.11503800 | -4.78540200 | -1.00847000 |
| C | -1.66653400 | 0.91220400  | 1.59263100  |
| C | -0.59118300 | 0.41673500  | 2.28805600  |
| H | -0.55803400 | -0.64058000 | 2.53515800  |
| S | 1.47233000  | 1.39506100  | 0.29264300  |
| C | 3.03327400  | 0.49770800  | 0.25043000  |
| C | 3.46396600  | -0.16001400 | -0.90744400 |
| C | 3.87892300  | 0.59645600  | 1.36063600  |
| C | 4.73372200  | -0.73381600 | -0.93771800 |
| H | 2.80834000  | -0.22517500 | -1.76776000 |
| C | 5.15105900  | 0.02471300  | 1.31554800  |
| H | 3.55401200  | 1.12109900  | 2.25336200  |
| C | 5.57991300  | -0.64556700 | 0.16982000  |
| H | 5.06229300  | -1.24984600 | -1.83485900 |
| H | 5.80379500  | 0.10390800  | 2.17978800  |
| H | 6.56849800  | -1.09312300 | 0.13788000  |
| C | 0.57590400  | 1.17761400  | 2.51247100  |

|                                              |                |             |                             |
|----------------------------------------------|----------------|-------------|-----------------------------|
| H                                            | 0.49563800     | 2.25876100  | 2.57046500                  |
| H                                            | 1.38838100     | 0.74798000  | 3.09062900                  |
| H                                            | -1.65814600    | 1.97359600  | 1.34928400                  |
| C                                            | -2.86410100    | 0.19242500  | 1.19163700                  |
| C                                            | -3.95141600    | 0.92038200  | 0.66584000                  |
| C                                            | -2.99067500    | -1.20998500 | 1.28696000                  |
| C                                            | -5.12416200    | 0.28251500  | 0.27498400                  |
| H                                            | -3.86685100    | 1.99989900  | 0.57319500                  |
| C                                            | -4.16280000    | -1.84516300 | 0.89332000                  |
| H                                            | -2.15849500    | -1.80582900 | 1.64561000                  |
| C                                            | -5.23686700    | -1.10430200 | 0.39097900                  |
| H                                            | -5.94892100    | 0.86541400  | -0.12430200                 |
| H                                            | -4.23748400    | -2.92604900 | 0.96841300                  |
| H                                            | -6.14940500    | -1.60613900 | 0.08312600                  |
| Zero-point correction=                       |                |             | 0.393354 (Hartree/Particle) |
| Thermal correction to Energy=                |                |             | 0.417978                    |
| Thermal correction to Enthalpy=              |                |             | 0.418922                    |
| Thermal correction to Gibbs Free Energy=     |                |             | 0.336599                    |
| Sum of electronic and zero-point Energies=   |                |             | -1475.998746                |
| Sum of electronic and thermal Energies=      |                |             | -1475.974122                |
| Sum of electronic and thermal Enthalpies=    |                |             | -1475.973178                |
| Sum of electronic and thermal Free Energies= |                |             | -1476.055501                |
| E(RB3LYP) =                                  | -1476.82905428 | A.U.        |                             |

E-2a

|     |             |             |             |
|-----|-------------|-------------|-------------|
| 0 1 |             |             |             |
| C   | -0.82934400 | 0.24724700  | 1.03741300  |
| C   | -0.52809900 | 0.08108700  | 2.44346900  |
| O   | -0.58666500 | 0.97285500  | 3.27904200  |
| O   | -0.14294100 | -1.19685900 | 2.79023000  |
| C   | 0.15792000  | -1.36898800 | 4.17573100  |
| H   | -0.71117700 | -1.14579600 | 4.80141400  |
| H   | 0.44368300  | -2.41646700 | 4.28809700  |
| H   | 0.97965200  | -0.71746500 | 4.48609500  |
| C   | -1.27361800 | 1.56648900  | 0.52512300  |
| C   | -2.37464700 | 2.22094700  | 1.10903900  |
| C   | -0.62733900 | 2.21113400  | -0.54527500 |
| C   | -2.82005400 | 3.45046300  | 0.62953100  |
| H   | -2.86916900 | 1.75518100  | 1.95413100  |
| C   | -1.08606900 | 3.43281000  | -1.04258700 |
| H   | 0.26841600  | 1.76650200  | -0.96631700 |
| C   | -2.18770900 | 4.05758500  | -0.45834700 |
| H   | -3.67067600 | 3.93401500  | 1.10216200  |
| H   | -0.56601000 | 3.90655400  | -1.87107800 |

|                                              |                |             |                             |
|----------------------------------------------|----------------|-------------|-----------------------------|
| H                                            | -2.54129300    | 5.01262900  | -0.83621200                 |
| C                                            | 2.55319800     | -0.19385500 | -1.29598000                 |
| H                                            | 2.20308700     | 0.69630800  | -1.81853500                 |
| C                                            | 1.66672700     | -1.17730500 | -1.06647200                 |
| H                                            | 1.97887700     | -2.09204800 | -0.56697000                 |
| S                                            | -0.87299800    | -1.17390400 | 0.09985100                  |
| C                                            | -2.47929800    | -1.34522600 | -0.73902300                 |
| C                                            | -2.98784600    | -0.39446100 | -1.63090800                 |
| C                                            | -3.22166600    | -2.48470700 | -0.41261600                 |
| C                                            | -4.24568400    | -0.59827800 | -2.19933000                 |
| H                                            | -2.42437600    | 0.50086200  | -1.86679800                 |
| C                                            | -4.47697100    | -2.67983500 | -0.98994200                 |
| H                                            | -2.81990300    | -3.20907900 | 0.28923100                  |
| C                                            | -4.98851400    | -1.73784000 | -1.88335000                 |
| H                                            | -4.64602300    | 0.13889600  | -2.88876200                 |
| H                                            | -5.05276100    | -3.56581800 | -0.73996100                 |
| H                                            | -5.96617300    | -1.88917400 | -2.33097100                 |
| C                                            | 0.23396700     | -1.10229300 | -1.45053400                 |
| H                                            | -0.01179100    | -0.20144400 | -2.01487000                 |
| H                                            | -0.10123200    | -1.98267200 | -2.00964400                 |
| C                                            | 3.98097600     | -0.18163000 | -0.95325200                 |
| C                                            | 4.58422600     | -1.15288900 | -0.13234300                 |
| C                                            | 4.78982000     | 0.84896000  | -1.46296000                 |
| C                                            | 5.94461200     | -1.09847400 | 0.15255700                  |
| H                                            | 3.98278200     | -1.94665900 | 0.29930300                  |
| C                                            | 6.15282900     | 0.90359800  | -1.17842000                 |
| H                                            | 4.33961700     | 1.61310700  | -2.09144400                 |
| C                                            | 6.73672200     | -0.07207600 | -0.37054300                 |
| H                                            | 6.38972600     | -1.85545300 | 0.79171200                  |
| H                                            | 6.75702600     | 1.70913800  | -1.58519300                 |
| H                                            | 7.79771700     | -0.03139400 | -0.14307500                 |
| Zero-point correction=                       |                |             | 0.394346 (Hartree/Particle) |
| Thermal correction to Energy=                |                |             | 0.419674                    |
| Thermal correction to Enthalpy=              |                |             | 0.420618                    |
| Thermal correction to Gibbs Free Energy=     |                |             | 0.334272                    |
| Sum of electronic and zero-point Energies=   |                |             | -1476.000243                |
| Sum of electronic and thermal Energies=      |                |             | -1475.974915                |
| Sum of electronic and thermal Enthalpies=    |                |             | -1475.973971                |
| Sum of electronic and thermal Free Energies= |                |             | -1476.060317                |
| E(RB3LYP) =                                  | -1476.82863254 | A.U.        |                             |

E-tsc1

1 1

|   |             |             |             |
|---|-------------|-------------|-------------|
| C | -2.10709300 | -0.49277100 | -0.23827900 |
|---|-------------|-------------|-------------|

|    |             |             |             |
|----|-------------|-------------|-------------|
| C  | -1.97037700 | -1.63513500 | -1.12257200 |
| O  | -1.19624700 | -2.58283500 | -0.88581000 |
| O  | -2.70694200 | -1.60757900 | -2.25195800 |
| C  | -2.43429000 | -2.64067200 | -3.22140100 |
| H  | -2.68210200 | -3.62136800 | -2.81170300 |
| H  | -3.07043700 | -2.41022300 | -4.07519400 |
| H  | -1.38139900 | -2.62566600 | -3.51160300 |
| C  | -2.17801100 | -0.73185100 | 1.23947600  |
| C  | -2.90713400 | -1.81880100 | 1.76073200  |
| C  | -1.54223400 | 0.13106000  | 2.15385300  |
| C  | -2.98901900 | -2.03704100 | 3.13497000  |
| H  | -3.40603400 | -2.50215800 | 1.08058500  |
| C  | -1.64834900 | -0.07105300 | 3.53207800  |
| H  | -0.94285800 | 0.95214700  | 1.77267000  |
| C  | -2.36960800 | -1.15812900 | 4.02758900  |
| H  | -3.54871500 | -2.88863300 | 3.51040100  |
| H  | -1.15286700 | 0.61157500  | 4.21662600  |
| H  | -2.44450900 | -1.32312600 | 5.09808200  |
| P  | 2.93262700  | -0.96284100 | -0.01547600 |
| Au | 0.62254200  | -1.05302700 | -0.19178900 |
| C  | 3.40245800  | -1.35712100 | 1.82121100  |
| C  | 2.46356900  | -0.57502200 | 2.76963000  |
| C  | 3.15391100  | -2.85423100 | 2.10555000  |
| C  | 4.86925200  | -1.01533900 | 2.15637600  |
| H  | 2.57563800  | 0.50542700  | 2.69917300  |
| H  | 1.41355300  | -0.82426600 | 2.59451700  |
| H  | 2.70748500  | -0.86378700 | 3.79845200  |
| H  | 3.86014100  | -3.51043100 | 1.59570400  |
| H  | 3.28183400  | -3.01866400 | 3.18100400  |
| H  | 2.13528700  | -3.15790200 | 1.84737700  |
| H  | 5.06870300  | -1.32496300 | 3.18842200  |
| H  | 5.58309700  | -1.53763800 | 1.51718100  |
| H  | 5.07360100  | 0.05538500  | 2.09849000  |
| C  | 3.62596900  | -2.32083200 | -1.21493400 |
| C  | 2.76480000  | -3.60231000 | -1.10381200 |
| C  | 3.48637400  | -1.83471500 | -2.67419800 |
| C  | 5.10328100  | -2.67423900 | -0.94127000 |
| H  | 2.80371600  | -4.07294900 | -0.12353000 |
| H  | 1.71607900  | -3.41137700 | -1.34726800 |
| H  | 3.14993700  | -4.32810000 | -1.82920800 |
| H  | 4.16233600  | -1.01540700 | -2.92226700 |
| H  | 3.74044400  | -2.67130000 | -3.33413700 |
| H  | 2.46100100  | -1.53384100 | -2.90864300 |
| H  | 5.43682700  | -3.38070000 | -1.70975800 |

|   |             |             |             |
|---|-------------|-------------|-------------|
| H | 5.76463700  | -1.80730100 | -0.98842000 |
| H | 5.24439500  | -3.16462100 | 0.02373900  |
| C | 3.54657000  | 0.79873800  | -0.53222000 |
| C | 2.74771900  | 1.26982400  | -1.77009900 |
| C | 3.22811400  | 1.80256600  | 0.59579000  |
| C | 5.05735000  | 0.85722700  | -0.84343100 |
| H | 2.91846500  | 0.66171700  | -2.65649100 |
| H | 1.67325300  | 1.29026600  | -1.56699800 |
| H | 3.05916000  | 2.29367500  | -2.00459700 |
| H | 3.84765500  | 1.65972300  | 1.48249300  |
| H | 3.42642000  | 2.81213400  | 0.22140700  |
| H | 2.17462200  | 1.76790400  | 0.88569000  |
| H | 5.32328000  | 1.89858400  | -1.05749700 |
| H | 5.67628400  | 0.53020700  | -0.00568400 |
| H | 5.33066700  | 0.27138400  | -1.72284100 |
| C | -0.74991000 | 3.61108700  | 0.37972200  |
| H | -0.92312200 | 3.45351600  | 1.44482500  |
| C | -1.62923500 | 3.07338800  | -0.48296900 |
| H | -1.52497000 | 3.22591300  | -1.55473700 |
| S | -3.14269000 | 0.76631500  | -0.95159600 |
| C | -4.88521700 | 0.46617500  | -0.54760200 |
| C | -5.37968600 | 0.49410500  | 0.76229000  |
| C | -5.71783600 | 0.15725100  | -1.62889500 |
| C | -6.73088300 | 0.22303400  | 0.97951400  |
| H | -4.73142300 | 0.71847600  | 1.60150700  |
| C | -7.06704600 | -0.11195800 | -1.39577500 |
| H | -5.31566800 | 0.13007600  | -2.63638300 |
| C | -7.57210700 | -0.07838700 | -0.09476300 |
| H | -7.12540000 | 0.24668700  | 1.99051900  |
| H | -7.72074900 | -0.34531700 | -2.23025400 |
| H | -8.62236700 | -0.28702400 | 0.08364800  |
| C | -2.86016000 | 2.35821500  | -0.03370900 |
| H | -2.86681600 | 2.15896200  | 1.03956200  |
| H | -3.76825300 | 2.91460800  | -0.29382900 |
| C | 0.41994700  | 4.44267800  | 0.06869900  |
| C | 0.83503300  | 4.73308500  | -1.24526500 |
| C | 1.16048400  | 4.98301300  | 1.13513700  |
| C | 1.95103000  | 5.53153700  | -1.47752200 |
| H | 0.28301400  | 4.33696000  | -2.09211600 |
| C | 2.27767900  | 5.78457600  | 0.90318800  |
| H | 0.84915800  | 4.77669700  | 2.15616500  |
| C | 2.67788400  | 6.06062900  | -0.40498700 |
| H | 2.25238200  | 5.75069800  | -2.49762200 |
| H | 2.83001100  | 6.19751200  | 1.74186000  |

|                                              |                |            |                             |
|----------------------------------------------|----------------|------------|-----------------------------|
| H                                            | 3.54356200     | 6.68904300 | -0.59080900                 |
| Zero-point correction=                       |                |            | 0.768229 (Hartree/Particle) |
| Thermal correction to Energy=                |                |            | 0.814360                    |
| Thermal correction to Enthalpy=              |                |            | 0.815304                    |
| Thermal correction to Gibbs Free Energy=     |                |            | 0.686135                    |
| Sum of electronic and zero-point Energies=   |                |            | -2425.850911                |
| Sum of electronic and thermal Energies=      |                |            | -2425.804780                |
| Sum of electronic and thermal Enthalpies=    |                |            | -2425.803836                |
| Sum of electronic and thermal Free Energies= |                |            | -2425.933005                |
| E(RB3LYP) =                                  | -2427.38135200 | A.U.       |                             |

E-tsc2

1 1

|    |             |             |             |
|----|-------------|-------------|-------------|
| C  | 2.67887400  | 0.35795200  | -0.77780400 |
| C  | 1.73219700  | 0.89998200  | -1.72510400 |
| O  | 0.47992900  | 0.90623900  | -1.64283100 |
| O  | 2.30476900  | 1.52656900  | -2.76675300 |
| C  | 1.44548100  | 2.07887200  | -3.78171700 |
| H  | 0.81444000  | 2.86925000  | -3.36924400 |
| H  | 2.12043700  | 2.48508100  | -4.53362100 |
| H  | 0.81545900  | 1.29981600  | -4.21608700 |
| C  | 2.22046000  | -0.63770200 | 0.23044200  |
| C  | 1.45184400  | -1.74450200 | -0.17954100 |
| C  | 2.64680400  | -0.58931300 | 1.56566500  |
| C  | 1.12131300  | -2.76015300 | 0.71841600  |
| H  | 1.15285300  | -1.83075000 | -1.22010600 |
| C  | 2.30580500  | -1.59814600 | 2.46697500  |
| H  | 3.27541000  | 0.22964400  | 1.89164400  |
| C  | 1.54256500  | -2.68840700 | 2.04775900  |
| H  | 0.55908000  | -3.62198400 | 0.37055900  |
| H  | 2.65356900  | -1.53996500 | 3.49407300  |
| H  | 1.29564900  | -3.48371300 | 2.74457900  |
| P  | -3.37069700 | -0.59962600 | 0.04993800  |
| Au | -1.27665300 | 0.11346100  | -0.63834300 |
| C  | -4.65114400 | 0.70254600  | -0.59862400 |
| C  | -4.10026900 | 2.12729800  | -0.35207100 |
| C  | -4.80782300 | 0.56208700  | -2.12909400 |
| C  | -6.03931200 | 0.57363900  | 0.06366500  |
| H  | -3.96236700 | 2.36664500  | 0.70036700  |
| H  | -3.14729500 | 2.28365200  | -0.86525800 |
| H  | -4.82210300 | 2.84354300  | -0.76082900 |
| H  | -5.32466300 | -0.35043900 | -2.42853300 |
| H  | -5.41325800 | 1.40317800  | -2.48424700 |
| H  | -3.84595800 | 0.61178000  | -2.64821000 |



|   |             |             |             |
|---|-------------|-------------|-------------|
| H | -6.71415800 | 1.29721600  | -0.40719500 |
| H | -6.48348500 | -0.41487800 | -0.06467300 |
| H | -6.01733100 | 0.80516500  | 1.12994300  |
| C | -3.69610300 | -2.33472100 | -0.74914000 |
| C | -3.17499600 | -2.33135100 | -2.20576300 |
| C | -2.88091500 | -3.41068300 | -0.00050600 |
| C | -5.18536200 | -2.73943500 | -0.73832600 |
| H | -3.67758000 | -1.61237300 | -2.84953900 |
| H | -2.10027800 | -2.13213600 | -2.24552100 |
| H | -3.34552900 | -3.32724800 | -2.62995400 |
| H | -3.25418600 | -3.60803900 | 1.00497800  |
| H | -2.96163200 | -4.34734900 | -0.56309500 |
| H | -1.82051900 | -3.15249700 | 0.05958500  |
| H | -5.26842800 | -3.75782200 | -1.13419800 |
| H | -5.61667000 | -2.74619200 | 0.26444100  |
| H | -5.80053600 | -2.10014800 | -1.37377000 |
| C | -3.40413400 | -0.70826200 | 1.98126200  |
| C | -2.08529900 | -1.34944400 | 2.47311300  |
| C | -3.44319100 | 0.71313800  | 2.58309500  |
| C | -4.60400500 | -1.51209800 | 2.52544500  |
| H | -1.95626100 | -2.38299700 | 2.15865400  |
| H | -1.21124000 | -0.78303500 | 2.14188000  |
| H | -2.09424300 | -1.34007200 | 3.56905500  |
| H | -4.39039800 | 1.22613100  | 2.41080800  |
| H | -3.32446300 | 0.61801500  | 3.66809300  |
| H | -2.62361300 | 1.33969400  | 2.22082000  |
| H | -4.57919800 | -1.46785500 | 3.62013500  |
| H | -5.56624000 | -1.10681400 | 2.20706700  |
| H | -4.56615800 | -2.56722900 | 2.24913700  |
| C | 2.73125900  | 2.63643600  | 0.19252100  |
| H | 2.67212200  | 2.99340700  | -0.83094000 |
| C | 4.04985000  | 2.60988700  | 0.73385900  |
| H | 4.17944100  | 2.43085000  | 1.79846000  |
| S | 4.33022500  | 0.19269400  | -1.44335700 |
| C | 5.11434000  | -1.11924600 | -0.49893000 |
| C | 4.91400900  | -2.45252700 | -0.88184000 |
| C | 6.02202200  | -0.81270800 | 0.52192400  |
| C | 5.60142000  | -3.47297900 | -0.22511700 |
| H | 4.23249000  | -2.68542000 | -1.69303400 |
| C | 6.71217800  | -1.83883800 | 1.16881500  |
| H | 6.18675400  | 0.22157400  | 0.80107600  |
| C | 6.49983000  | -3.16810800 | 0.79979900  |
| H | 5.44395200  | -4.50512500 | -0.52314600 |
| H | 7.41780600  | -1.59786000 | 1.95817800  |

|                                              |                |             |                             |
|----------------------------------------------|----------------|-------------|-----------------------------|
| H                                            | 7.04008800     | -3.96438100 | 1.30275800                  |
| C                                            | 5.15494200     | 2.75377200  | -0.04164900                 |
| H                                            | 5.08292000     | 3.00707300  | -1.09303900                 |
| C                                            | 1.53180800     | 2.86717000  | 0.98975100                  |
| C                                            | 1.46855500     | 2.62687000  | 2.38035300                  |
| C                                            | 0.40312700     | 3.44517900  | 0.36834400                  |
| C                                            | 0.33821400     | 2.96996300  | 3.11369900                  |
| H                                            | 2.31477300     | 2.18653700  | 2.89562400                  |
| C                                            | -0.72504900    | 3.79579400  | 1.10627800                  |
| H                                            | 0.43672100     | 3.65831200  | -0.69555700                 |
| C                                            | -0.76088000    | 3.56375800  | 2.48339300                  |
| H                                            | 0.31901600     | 2.79239900  | 4.18479900                  |
| H                                            | -1.56560600    | 4.27279100  | 0.61118600                  |
| H                                            | -1.62918700    | 3.85800100  | 3.06540700                  |
| H                                            | 6.15393100     | 2.71764200  | 0.38080300                  |
| Zero-point correction=                       |                |             | 0.767603 (Hartree/Particle) |
| Thermal correction to Energy=                |                |             | 0.813851                    |
| Thermal correction to Enthalpy=              |                |             | 0.814795                    |
| Thermal correction to Gibbs Free Energy=     |                |             | 0.687090                    |
| Sum of electronic and zero-point Energies=   |                |             | -2425.855076                |
| Sum of electronic and thermal Energies=      |                |             | -2425.808827                |
| Sum of electronic and thermal Enthalpies=    |                |             | -2425.807883                |
| Sum of electronic and thermal Free Energies= |                |             | -2425.935589                |
| E(RB3LYP) =                                  | -2427.38135200 | A.U.        |                             |

E-td1

|     |             |             |             |
|-----|-------------|-------------|-------------|
| 1 1 |             |             |             |
| C   | -2.08180900 | -0.45530700 | 0.34951900  |
| C   | -1.94558400 | -0.38452400 | 1.79042400  |
| O   | -1.21183300 | -1.10284000 | 2.46547300  |
| O   | -2.67822100 | 0.61518000  | 2.37995100  |
| C   | -2.48198000 | 0.76272600  | 3.79994600  |
| H   | -1.44162000 | 1.01012100  | 4.02275700  |
| H   | -3.14021300 | 1.57740800  | 4.10191600  |
| H   | -2.74536400 | -0.15818300 | 4.32351000  |
| C   | -1.77856800 | -1.72805000 | -0.39387800 |
| C   | -1.75879600 | -2.98831100 | 0.26584000  |
| C   | -1.58437200 | -1.74173600 | -1.80627000 |
| C   | -1.56557900 | -4.16863700 | -0.44560900 |
| H   | -1.88974900 | -3.02031400 | 1.33949700  |
| C   | -1.40629600 | -2.93732800 | -2.50643500 |
| H   | -1.61269600 | -0.80913100 | -2.36079600 |
| C   | -1.39860700 | -4.15794100 | -1.83435000 |
| H   | -1.56500800 | -5.11178700 | 0.09314100  |

|    |             |             |             |
|----|-------------|-------------|-------------|
| H  | -1.27910300 | -2.90383700 | -3.58443000 |
| H  | -1.26651800 | -5.08664000 | -2.38013100 |
| P  | 2.84965000  | -0.82666800 | 0.08304300  |
| Au | 0.53708300  | -0.91989300 | -0.13808600 |
| C  | 3.55178800  | 0.48433500  | -1.15602600 |
| C  | 2.81201900  | 0.35491500  | -2.50848600 |
| C  | 3.24779800  | 1.90475300  | -0.63596400 |
| C  | 5.07250100  | 0.35000400  | -1.38527400 |
| H  | 2.97013100  | -0.59931300 | -3.00740100 |
| H  | 1.73521700  | 0.50426400  | -2.38861400 |
| H  | 3.18631600  | 1.14001000  | -3.17522300 |
| H  | 3.80797200  | 2.16572600  | 0.26253700  |
| H  | 3.53844300  | 2.62083800  | -1.41217200 |
| H  | 2.18265700  | 2.05579800  | -0.44471900 |
| H  | 5.39540000  | 1.16798300  | -2.03911400 |
| H  | 5.64787400  | 0.42728000  | -0.46068300 |
| H  | 5.34461000  | -0.58230300 | -1.88315300 |
| C  | 3.23981300  | -0.34192900 | 1.91517800  |
| C  | 2.27414900  | 0.78422800  | 2.35658400  |
| C  | 2.94793800  | -1.53687400 | 2.84979900  |
| C  | 4.70068100  | 0.11136800  | 2.12187000  |
| H  | 2.34056400  | 1.68680200  | 1.75123900  |
| H  | 1.23825700  | 0.43334800  | 2.35241400  |
| H  | 2.52803800  | 1.05853600  | 3.38722300  |
| H  | 3.65568300  | -2.35870400 | 2.73312200  |
| H  | 3.03837000  | -1.18190400 | 3.88244600  |
| H  | 1.92927800  | -1.91465900 | 2.72682600  |
| H  | 4.85653100  | 0.29567300  | 3.19080300  |
| H  | 5.42577900  | -0.64477800 | 1.81501200  |
| H  | 4.93279400  | 1.04158800  | 1.60021000  |
| C  | 3.52478200  | -2.59557000 | -0.32589100 |
| C  | 2.60920400  | -3.66162100 | 0.32272400  |
| C  | 3.45163600  | -2.84056100 | -1.84907300 |
| C  | 4.97773700  | -2.81338800 | 0.14922900  |
| H  | 2.56596900  | -3.60422500 | 1.40835100  |
| H  | 1.58762200  | -3.60589700 | -0.06338500 |
| H  | 3.00886200  | -4.64865600 | 0.06300700  |
| H  | 4.16239400  | -2.24019600 | -2.41841900 |
| H  | 3.70171900  | -3.89137700 | -2.03228100 |
| H  | 2.44476200  | -2.67181200 | -2.24153400 |
| H  | 5.30436300  | -3.80486700 | -0.18438800 |
| H  | 5.67601300  | -2.08521400 | -0.26722400 |
| H  | 5.07176500  | -2.79698300 | 1.23658800  |
| C  | -1.16561000 | 3.84670000  | -0.63762200 |

|                                              |                |             |                             |
|----------------------------------------------|----------------|-------------|-----------------------------|
| H                                            | -1.78869300    | 4.13352800  | -1.48577700                 |
| C                                            | -1.64797000    | 2.92628800  | 0.21711900                  |
| H                                            | -1.05757500    | 2.57656100  | 1.05877200                  |
| S                                            | -3.10607300    | 0.63222400  | -0.57417100                 |
| C                                            | -4.87481400    | 0.25472800  | -0.37866700                 |
| C                                            | -5.46700300    | -0.01821400 | 0.85905700                  |
| C                                            | -5.62003600    | 0.23054000  | -1.56261400                 |
| C                                            | -6.83045200    | -0.30750600 | 0.90202300                  |
| H                                            | -4.87321300    | -0.00321400 | 1.76487100                  |
| C                                            | -6.98525100    | -0.05531400 | -1.50255000                 |
| H                                            | -5.14197100    | 0.42784500  | -2.51753000                 |
| C                                            | -7.58803900    | -0.32396600 | -0.27299000                 |
| H                                            | -7.30267700    | -0.52030900 | 1.85611600                  |
| H                                            | -7.57143500    | -0.07518800 | -2.41582600                 |
| H                                            | -8.64861400    | -0.55121900 | -0.22881900                 |
| C                                            | -3.02720200    | 2.38094100  | 0.11087000                  |
| H                                            | -3.53614600    | 2.33772300  | 1.07238800                  |
| H                                            | -3.63781600    | 2.92623800  | -0.61333700                 |
| C                                            | 0.12398600     | 4.54265600  | -0.55601400                 |
| C                                            | 0.88130200     | 4.60481200  | 0.62971700                  |
| C                                            | 0.61395000     | 5.20251200  | -1.69730000                 |
| C                                            | 2.09497400     | 5.28653600  | 0.66160400                  |
| H                                            | 0.50034400     | 4.14813600  | 1.53824500                  |
| C                                            | 1.83251000     | 5.87847000  | -1.66707100                 |
| H                                            | 0.03223200     | 5.18050000  | -2.61528400                 |
| C                                            | 2.57799400     | 5.92162100  | -0.48735800                 |
| H                                            | 2.65789200     | 5.34128400  | 1.58884500                  |
| H                                            | 2.19352400     | 6.38123500  | -2.55916300                 |
| H                                            | 3.51955700     | 6.46146100  | -0.45627700                 |
| Zero-point correction=                       |                |             | 0.768476 (Hartree/Particle) |
| Thermal correction to Energy=                |                |             | 0.814528                    |
| Thermal correction to Enthalpy=              |                |             | 0.815472                    |
| Thermal correction to Gibbs Free Energy=     |                |             | 0.686070                    |
| Sum of electronic and zero-point Energies=   |                |             | -2425.854283                |
| Sum of electronic and thermal Energies=      |                |             | -2425.808231                |
| Sum of electronic and thermal Enthalpies=    |                |             | -2425.807287                |
| Sum of electronic and thermal Free Energies= |                |             | -2425.936689                |
| E(RB3LYP) =                                  | -2427.38543024 | A.U.        |                             |

E-td2

|     |            |            |            |
|-----|------------|------------|------------|
| 1 1 |            |            |            |
| C   | 2.73927500 | 0.38369700 | 0.53195600 |
| C   | 1.79250200 | 1.09621000 | 1.35361100 |
| O   | 0.53839100 | 1.08601300 | 1.28019300 |

|    |             |             |             |
|----|-------------|-------------|-------------|
| O  | 2.36739800  | 1.89280600  | 2.27082300  |
| C  | 1.50935300  | 2.59402400  | 3.18922000  |
| H  | 0.93285600  | 1.88608000  | 3.78937500  |
| H  | 2.18314300  | 3.16626300  | 3.82559000  |
| H  | 0.82662600  | 3.25756200  | 2.65577000  |
| C  | 2.29612100  | -0.76793100 | -0.30000200 |
| C  | 1.45794400  | -1.75271900 | 0.25776500  |
| C  | 2.78376900  | -0.98407500 | -1.59996400 |
| C  | 1.11102400  | -2.89649900 | -0.46299400 |
| H  | 1.11518000  | -1.64213800 | 1.28182600  |
| C  | 2.42945900  | -2.12177400 | -2.32487900 |
| H  | 3.47543200  | -0.27625200 | -2.04234400 |
| C  | 1.58923500  | -3.08300300 | -1.76120600 |
| H  | 0.48789600  | -3.65405700 | 0.00356100  |
| H  | 2.82528100  | -2.26360200 | -3.32602200 |
| H  | 1.32751000  | -3.97664400 | -2.31960000 |
| P  | -3.36096900 | -0.68415900 | 0.03279900  |
| Au | -1.24951900 | 0.15053800  | 0.49748100  |
| C  | -3.36828400 | -1.47523500 | -1.73264200 |
| C  | -2.56933800 | -0.56518600 | -2.69465600 |
| C  | -2.62309900 | -2.82665800 | -1.70249600 |
| C  | -4.78779700 | -1.69949300 | -2.29442800 |
| H  | -3.01166800 | 0.41973200  | -2.82977600 |
| H  | -1.53781600 | -0.43363900 | -2.35713700 |
| H  | -2.54160200 | -1.05165000 | -3.67643500 |
| H  | -3.15666000 | -3.59906200 | -1.14737600 |
| H  | -2.52974800 | -3.18104200 | -2.73504900 |
| H  | -1.61148000 | -2.72632000 | -1.30084300 |
| H  | -4.69918500 | -2.21425600 | -3.25768600 |
| H  | -5.40607800 | -2.32551800 | -1.64868100 |
| H  | -5.32069700 | -0.76560500 | -2.48166400 |
| C  | -3.76650600 | -2.01050400 | 1.38496500  |
| C  | -2.52623000 | -2.90691900 | 1.61265300  |
| C  | -4.04060900 | -1.31057100 | 2.73419200  |
| C  | -4.97760000 | -2.89733100 | 1.02491900  |
| H  | -2.21678700 | -3.45945200 | 0.72790300  |
| H  | -1.67267500 | -2.32457800 | 1.97071900  |
| H  | -2.77682500 | -3.63952400 | 2.38816900  |
| H  | -4.97753500 | -0.75247400 | 2.74766800  |
| H  | -4.11658800 | -2.08405500 | 3.50622600  |
| H  | -3.22340800 | -0.64229600 | 3.02133000  |
| H  | -5.17212300 | -3.57231700 | 1.86600700  |
| H  | -5.88980800 | -2.32271000 | 0.85502400  |
| H  | -4.79664400 | -3.52388900 | 0.14948600  |

|   |             |             |             |
|---|-------------|-------------|-------------|
| C | -4.59879700 | 0.80224000  | 0.13124100  |
| C | -4.23032500 | 1.69914800  | 1.33798000  |
| C | -4.44106900 | 1.68669200  | -1.12465000 |
| C | -6.07329700 | 0.36327000  | 0.25535800  |
| H | -4.31210100 | 1.19756500  | 2.30049600  |
| H | -3.21762300 | 2.10144300  | 1.24492200  |
| H | -4.92490800 | 2.54688800  | 1.35209800  |
| H | -4.80900400 | 1.21037900  | -2.03447000 |
| H | -5.03822400 | 2.59285800  | -0.97400100 |
| H | -3.40415700 | 1.99888300  | -1.27726300 |
| H | -6.70251400 | 1.25993000  | 0.22692600  |
| H | -6.39474800 | -0.28375000 | -0.56249200 |
| H | -6.28376100 | -0.14313200 | 1.19905400  |
| C | 2.74686800  | 2.40301300  | -0.96699300 |
| H | 3.13302900  | 1.69592300  | -1.69176500 |
| C | 3.72100900  | 3.15792500  | -0.26299300 |
| H | 3.39687200  | 3.95119600  | 0.40443000  |
| C | 5.21721600  | -1.04422900 | 0.50286800  |
| C | 6.24102300  | -0.86882400 | -0.43595900 |
| C | 4.93667000  | -2.32400600 | 1.00145000  |
| C | 6.96605500  | -1.97238500 | -0.88961500 |
| H | 6.47998300  | 0.12378500  | -0.80169900 |
| C | 5.65691100  | -3.42253500 | 0.53475600  |
| H | 4.16405600  | -2.45522500 | 1.75122200  |
| C | 6.67093400  | -3.24918700 | -0.41065900 |
| H | 7.76146700  | -1.83141200 | -1.61510600 |
| H | 5.43510800  | -4.41297500 | 0.92047500  |
| H | 7.23606400  | -4.10613900 | -0.76424600 |
| C | 5.04523300  | 2.85732400  | -0.31858300 |
| H | 5.42617100  | 2.13527800  | -1.03203400 |
| H | 5.78001000  | 3.40046400  | 0.26570200  |
| S | 4.39469800  | 0.39365600  | 1.20052500  |
| C | 1.38644400  | 2.85461800  | -1.22352200 |
| C | 0.76411100  | 3.88042600  | -0.47888100 |
| C | 0.67925100  | 2.30690200  | -2.31581700 |
| C | -0.49184900 | 4.36061700  | -0.83572100 |
| H | 1.27845000  | 4.32459200  | 0.36672800  |
| C | -0.57406700 | 2.79421500  | -2.67594100 |
| H | 1.14200500  | 1.51823300  | -2.90215900 |
| C | -1.16262100 | 3.82822900  | -1.94147200 |
| H | -0.94161000 | 5.16711700  | -0.26420600 |
| H | -1.08170500 | 2.38511700  | -3.54432700 |
| H | -2.12788700 | 4.22833800  | -2.23701000 |

Zero-point correction=

0.767110 (Hartree/Particle)

|                                              |              |
|----------------------------------------------|--------------|
| Thermal correction to Energy=                | 0.813543     |
| Thermal correction to Enthalpy=              | 0.814487     |
| Thermal correction to Gibbs Free Energy=     | 0.685832     |
| Sum of electronic and zero-point Energies=   | -2425.855697 |
| Sum of electronic and thermal Energies=      | -2425.809263 |
| Sum of electronic and thermal Enthalpies=    | -2425.808319 |
| Sum of electronic and thermal Free Energies= | -2425.936974 |

E(RB3LYP) = -2427.39459869      A.U.

F-tsa2

0 1

|   |             |             |             |
|---|-------------|-------------|-------------|
| C | 0.73186600  | -0.18255800 | -0.48347300 |
| C | 1.96639300  | -0.60459900 | -1.13581200 |
| O | 2.85966900  | 0.13116100  | -1.54300000 |
| O | 2.08343100  | -1.96935700 | -1.24211700 |
| C | 3.27475400  | -2.42444100 | -1.89112400 |
| H | 4.16827000  | -2.09989500 | -1.35080600 |
| H | 3.20758700  | -3.51305600 | -1.89535500 |
| H | 3.33305500  | -2.04396500 | -2.91438500 |
| C | 0.40328700  | 1.24072000  | -0.28220700 |
| C | 0.99151200  | 2.25280400  | -1.07652300 |
| C | -0.51854300 | 1.65671400  | 0.70422900  |
| C | 0.67630200  | 3.59506900  | -0.88092200 |
| H | 1.70800200  | 1.97435800  | -1.83599800 |
| C | -0.82732900 | 3.00109800  | 0.89460100  |
| H | -1.00529400 | 0.92120700  | 1.33212900  |
| C | -0.23251800 | 3.98443800  | 0.10394800  |
| H | 1.14871800  | 4.34391300  | -1.51103900 |
| H | -1.53962100 | 3.27797600  | 1.66717800  |
| H | -0.47510400 | 5.03282700  | 0.25046000  |
| C | 2.35384200  | -0.55672500 | 1.88750900  |
| C | 1.14890000  | -0.55713700 | 2.53883800  |
| H | 0.80944200  | 0.37236600  | 2.99153600  |
| S | -0.29200600 | -1.47272200 | 0.02617200  |
| C | -2.01052300 | -0.97546000 | -0.16408400 |
| C | -2.42977900 | -0.20434100 | -1.25439700 |
| C | -2.94994000 | -1.50021400 | 0.73000500  |
| C | -3.78814300 | 0.05335100  | -1.43045400 |
| H | -1.69886000 | 0.19275600  | -1.94898400 |
| C | -4.30815300 | -1.24455600 | 0.53739400  |
| H | -2.62656900 | -2.10677900 | 1.56991000  |
| C | -4.73038000 | -0.46389500 | -0.53880800 |
| H | -4.10963700 | 0.65895700  | -2.27248900 |
| H | -5.03366800 | -1.65388200 | 1.23407500  |

|                                              |                |             |                             |
|----------------------------------------------|----------------|-------------|-----------------------------|
| H                                            | -5.78705200    | -0.26140100 | -0.68411400                 |
| C                                            | 0.23025400     | -1.61975500 | 2.42981800                  |
| H                                            | 0.59466100     | -2.62580300 | 2.24948600                  |
| H                                            | -0.72837200    | -1.56002000 | 2.93602600                  |
| H                                            | 2.67680900     | -1.48234200 | 1.41243400                  |
| C                                            | 3.31243600     | 0.58452800  | 1.84148800                  |
| H                                            | 3.53333900     | 0.84622000  | 0.79734500                  |
| H                                            | 2.91635500     | 1.46957600  | 2.34640200                  |
| H                                            | 4.26981500     | 0.31586100  | 2.30823000                  |
| Zero-point correction=                       |                |             | 0.340146 (Hartree/Particle) |
| Thermal correction to Energy=                |                |             | 0.361580                    |
| Thermal correction to Enthalpy=              |                |             | 0.362524                    |
| Thermal correction to Gibbs Free Energy=     |                |             | 0.289306                    |
| Sum of electronic and zero-point Energies=   |                |             | -1284.306745                |
| Sum of electronic and thermal Energies=      |                |             | -1284.285311                |
| Sum of electronic and thermal Enthalpies=    |                |             | -1284.284367                |
| Sum of electronic and thermal Free Energies= |                |             | -1284.357585                |
| E(RB3LYP) =                                  | -1285.01213914 | A.U.        |                             |

F-td2

1 1

|    |             |             |             |
|----|-------------|-------------|-------------|
| C  | -2.66065800 | 0.89964700  | -0.28501600 |
| C  | -1.89226200 | 1.82249800  | -1.12093500 |
| O  | -0.70674300 | 1.67627700  | -1.42977500 |
| O  | -2.59562500 | 2.91402700  | -1.49142700 |
| C  | -1.90786500 | 3.86456800  | -2.32131400 |
| H  | -1.59092000 | 3.39956100  | -3.25789800 |
| H  | -2.63175100 | 4.65504200  | -2.51611300 |
| H  | -1.03080100 | 4.26638300  | -1.80842800 |
| C  | -2.10129800 | -0.42712200 | 0.02740000  |
| C  | -1.21628200 | -1.09407300 | -0.88013200 |
| C  | -2.48933600 | -1.13976400 | 1.17619300  |
| C  | -0.80524000 | -2.42845600 | -0.63403800 |
| H  | -1.05295300 | -0.65938200 | -1.86110200 |
| C  | -2.04877000 | -2.44238400 | 1.42171800  |
| H  | -3.17900500 | -0.68266700 | 1.87594100  |
| C  | -1.20326200 | -3.09793900 | 0.52844100  |
| H  | -0.23003700 | -2.94909700 | -1.39422500 |
| H  | -2.38647500 | -2.95327100 | 2.31860900  |
| H  | -0.88550300 | -4.11899500 | 0.71060300  |
| P  | 3.31880900  | -0.10634500 | 0.09541700  |
| Au | 1.03067500  | -0.55685000 | -0.24540000 |
| C  | 3.67099500  | -0.11462600 | 1.99758300  |
| C  | 2.54298000  | 0.65891200  | 2.71979200  |



|   |             |             |             |
|---|-------------|-------------|-------------|
| C | 3.61557200  | -1.56124900 | 2.53483800  |
| C | 5.03754600  | 0.50153800  | 2.36687300  |
| H | 2.49537400  | 1.71274900  | 2.45235900  |
| H | 1.56434900  | 0.20954400  | 2.52560500  |
| H | 2.72797700  | 0.60214100  | 3.79839400  |
| H | 4.45463300  | -2.17335100 | 2.20247300  |
| H | 3.66547900  | -1.51668200 | 3.62824500  |
| H | 2.68080300  | -2.06397800 | 2.27041500  |
| H | 5.17629800  | 0.40950900  | 3.45011300  |
| H | 5.87441700  | -0.01062400 | 1.88875300  |
| H | 5.10198900  | 1.56394800  | 2.12589500  |
| C | 4.30104600  | -1.51988100 | -0.79958800 |
| C | 3.62596800  | -2.88144300 | -0.50924200 |
| C | 4.22199700  | -1.32020500 | -2.32925900 |
| C | 5.78362600  | -1.59191600 | -0.37515700 |
| H | 3.64044400  | -3.16387100 | 0.54134400  |
| H | 2.58779700  | -2.89432300 | -0.85213800 |
| H | 4.17051800  | -3.65381700 | -1.06394800 |
| H | 4.77679500  | -0.45037700 | -2.68167200 |
| H | 4.66762700  | -2.19975300 | -2.80673100 |
| H | 3.18914000  | -1.24735200 | -2.68277200 |
| H | 6.27714300  | -2.36221400 | -0.97834800 |
| H | 6.32307800  | -0.65766900 | -0.53935300 |
| H | 5.90536800  | -1.88066000 | 0.67046000  |
| C | 3.72745000  | 1.61716800  | -0.68902500 |
| C | 2.94919800  | 1.75827900  | -2.01932300 |
| C | 3.21992300  | 2.74981800  | 0.22881000  |
| C | 5.23646700  | 1.82506100  | -0.93817300 |
| H | 3.20465100  | 1.00001500  | -2.75742600 |
| H | 1.86747000  | 1.73958700  | -1.86020400 |
| H | 3.20311500  | 2.73202500  | -2.45401300 |
| H | 3.78699900  | 2.84110100  | 1.15624100  |
| H | 3.33582900  | 3.69531000  | -0.31231200 |
| H | 2.15925300  | 2.64083100  | 0.46539200  |
| H | 5.38490200  | 2.84392500  | -1.31314300 |
| H | 5.83406300  | 1.72504300  | -0.02943800 |
| H | 5.63899200  | 1.14736500  | -1.69272500 |
| C | -1.99910200 | 2.23586000  | 1.78888200  |
| H | -1.97106300 | 1.24338800  | 2.22851100  |
| C | -3.18745400 | 2.96440700  | 1.89529700  |
| H | -3.18700000 | 3.99719600  | 1.55160700  |
| C | -5.18746200 | -0.44344400 | -0.25204300 |
| C | -6.06021700 | -0.77333600 | 0.79099000  |
| C | -5.04115100 | -1.30782100 | -1.34607100 |

|                                              |                |             |                             |
|----------------------------------------------|----------------|-------------|-----------------------------|
| C                                            | -6.77206700    | -1.97413100 | 0.74703800                  |
| H                                            | -6.19033800    | -0.09511000 | 1.62807100                  |
| C                                            | -5.74328700    | -2.51184800 | -1.37330000                 |
| H                                            | -4.39328800    | -1.03347600 | -2.17215800                 |
| C                                            | -6.60924600    | -2.84722300 | -0.32876200                 |
| H                                            | -7.45117400    | -2.22506500 | 1.55618400                  |
| H                                            | -5.62701300    | -3.18086400 | -2.22064900                 |
| H                                            | -7.16195100    | -3.78104900 | -0.35991700                 |
| C                                            | -4.38714100    | 2.37884000  | 2.22222400                  |
| H                                            | -4.42424900    | 1.38901100  | 2.66471800                  |
| H                                            | -5.31288300    | 2.94380300  | 2.22431600                  |
| S                                            | -4.40327800    | 1.17497400  | -0.25405900                 |
| C                                            | -0.67814800    | 2.88449200  | 1.53035100                  |
| H                                            | -0.08702100    | 2.32110000  | 0.79971300                  |
| H                                            | -0.79606900    | 3.90706300  | 1.16023300                  |
| H                                            | -0.09417300    | 2.92693300  | 2.46011400                  |
| Zero-point correction=                       |                |             | 0.713496 (Hartree/Particle) |
| Thermal correction to Energy=                |                |             | 0.756944                    |
| Thermal correction to Enthalpy=              |                |             | 0.757888                    |
| Thermal correction to Gibbs Free Energy=     |                |             | 0.635742                    |
| Sum of electronic and zero-point Energies=   |                |             | -2234.158302                |
| Sum of electronic and thermal Energies=      |                |             | -2234.114854                |
| Sum of electronic and thermal Enthalpies=    |                |             | -2234.113910                |
| Sum of electronic and thermal Free Energies= |                |             | -2234.236056                |
| E(RB3LYP) =                                  | -2235.56746079 | A.U.        |                             |

G-tsa2

0 1

|   |             |             |             |
|---|-------------|-------------|-------------|
| C | -0.06270900 | -0.49583900 | -0.62181400 |
| C | 0.84748500  | -1.37510200 | -1.34585300 |
| O | 1.70760200  | -1.04458000 | -2.15001800 |
| O | 0.67450600  | -2.70031200 | -1.00988000 |
| C | 1.48391200  | -3.62242600 | -1.74569300 |
| H | 2.54777200  | -3.42895900 | -1.58478800 |
| H | 1.21615600  | -4.61158900 | -1.37223600 |
| H | 1.27938800  | -3.55413900 | -2.81768600 |
| C | -0.01434600 | 0.96466400  | -0.70770600 |
| C | 0.72594800  | 1.63866700  | -1.70802000 |
| C | -0.69527000 | 1.76538900  | 0.23794200  |
| C | 0.76393200  | 3.02989300  | -1.75399200 |
| H | 1.27217000  | 1.05603200  | -2.43604400 |
| C | -0.64576200 | 3.15464000  | 0.18809000  |
| H | -1.26028700 | 1.28700800  | 1.02589800  |
| C | 0.07989900  | 3.80163900  | -0.81351900 |

|                                              |                |             |                             |
|----------------------------------------------|----------------|-------------|-----------------------------|
| H                                            | 1.33875100     | 3.51438800  | -2.53873800                 |
| H                                            | -1.18211000    | 3.73343700  | 0.93541700                  |
| H                                            | 0.11286300     | 4.88632500  | -0.85824100                 |
| C                                            | 1.73434600     | -0.78718200 | 1.54695600                  |
| C                                            | 0.74042200     | -0.29925100 | 2.38223700                  |
| H                                            | 0.73421500     | 0.75629100  | 2.63943500                  |
| C                                            | -3.00493000    | -0.34175600 | 0.12061800                  |
| C                                            | -3.41033400    | 0.08292300  | -1.14754400                 |
| C                                            | -3.82176300    | -0.13080700 | 1.23325000                  |
| C                                            | -4.62769500    | 0.74645200  | -1.29194700                 |
| H                                            | -2.77307800    | -0.09463100 | -2.00693600                 |
| C                                            | -5.04718800    | 0.51976000  | 1.07734600                  |
| H                                            | -3.50348100    | -0.46603200 | 2.21559500                  |
| C                                            | -5.44885000    | 0.96406300  | -0.18283800                 |
| H                                            | -4.93792500    | 1.08778400  | -2.27513600                 |
| H                                            | -5.68209100    | 0.68472100  | 1.94295000                  |
| H                                            | -6.39876400    | 1.47632400  | -0.30189800                 |
| C                                            | -0.36512200    | -1.06348200 | 2.74094500                  |
| H                                            | -0.31771300    | -2.14619900 | 2.70844100                  |
| H                                            | -1.14711300    | -0.64355400 | 3.36566100                  |
| H                                            | 1.70204700     | -1.84805000 | 1.30793900                  |
| Se                                           | -1.39417100    | -1.39442800 | 0.31918700                  |
| C                                            | 2.91654900     | -0.07942500 | 1.09517600                  |
| C                                            | 3.09649900     | 1.31138200  | 1.26405000                  |
| C                                            | 3.93792700     | -0.80112300 | 0.44101800                  |
| C                                            | 4.25538400     | 1.93749700  | 0.82079100                  |
| H                                            | 2.31788400     | 1.90519300  | 1.72988000                  |
| C                                            | 5.09775700     | -0.17228300 | 0.00141700                  |
| H                                            | 3.81422900     | -1.87016900 | 0.29285800                  |
| C                                            | 5.26422500     | 1.20062500  | 0.19276100                  |
| H                                            | 4.37175800     | 3.00849800  | 0.95878200                  |
| H                                            | 5.87066600     | -0.75162800 | -0.49489300                 |
| H                                            | 6.16773900     | 1.69512000  | -0.15145000                 |
| Zero-point correction=                       |                |             | 0.392194 (Hartree/Particle) |
| Thermal correction to Energy=                |                |             | 0.417240                    |
| Thermal correction to Enthalpy=              |                |             | 0.418184                    |
| Thermal correction to Gibbs Free Energy=     |                |             | 0.335118                    |
| Sum of electronic and zero-point Energies=   |                |             | -3477.211019                |
| Sum of electronic and thermal Energies=      |                |             | -3477.185973                |
| Sum of electronic and thermal Enthalpies=    |                |             | -3477.185028                |
| Sum of electronic and thermal Free Energies= |                |             | -3477.268095                |
| E(RB3LYP) =                                  | -3480.16289640 | A.U.        |                             |

G-tsc2

1 1

|    |             |             |             |
|----|-------------|-------------|-------------|
| C  | -2.33322200 | -0.24260000 | -0.39403100 |
| C  | -1.52815400 | -1.14025500 | -1.18175000 |
| O  | -0.27991900 | -1.10674400 | -1.34216100 |
| O  | -2.21590900 | -2.12681800 | -1.76576600 |
| C  | -1.49221100 | -3.07777500 | -2.57366600 |
| H  | -0.76248500 | -3.61668100 | -1.96825300 |
| H  | -2.25234200 | -3.75878300 | -2.95333300 |
| H  | -0.99089400 | -2.56794400 | -3.39900900 |
| C  | -1.78700000 | 1.08953400  | -0.01380900 |
| C  | -1.17137800 | 1.89453600  | -0.99435300 |
| C  | -1.96078600 | 1.63553700  | 1.26832300  |
| C  | -0.74956800 | 3.19138100  | -0.69973100 |
| H  | -1.05613600 | 1.51058600  | -2.00342300 |
| C  | -1.53415900 | 2.93077400  | 1.56474800  |
| H  | -2.45815300 | 1.05269500  | 2.03398600  |
| C  | -0.92914800 | 3.71583400  | 0.58239100  |
| H  | -0.30399700 | 3.80024900  | -1.48134700 |
| H  | -1.69156200 | 3.33108100  | 2.56187500  |
| H  | -0.61640700 | 4.73092500  | 0.80813900  |
| P  | 3.55478600  | 0.61609500  | 0.15852800  |
| Au | 1.47378000  | -0.14232200 | -0.52658300 |
| C  | 4.79639300  | -0.85110400 | -0.07824400 |
| C  | 4.14330700  | -2.16385000 | 0.41698400  |
| C  | 5.07633700  | -1.05333700 | -1.58386800 |
| C  | 6.13615400  | -0.64197400 | 0.65896900  |
| H  | 3.91842900  | -2.16694000 | 1.48194600  |
| H  | 3.22293300  | -2.38550800 | -0.13098200 |
| H  | 4.84781300  | -2.98218500 | 0.22945800  |
| H  | 5.66413400  | -0.24718000 | -2.02399200 |
| H  | 5.65954200  | -1.97366100 | -1.69764800 |
| H  | 4.15497800  | -1.17755900 | -2.16067800 |
| H  | 6.79767100  | -1.48114400 | 0.41629700  |
| H  | 6.64930600  | 0.27223000  | 0.35642000  |
| H  | 6.02152200  | -0.63020000 | 1.74445500  |
| C  | 4.04575300  | 2.11960200  | -0.95920900 |
| C  | 3.63435100  | 1.82551400  | -2.42202400 |
| C  | 3.24153300  | 3.36604300  | -0.53167300 |
| C  | 5.55188100  | 2.45111900  | -0.90470400 |
| H  | 4.13335000  | 0.96138200  | -2.85637100 |
| H  | 2.55407300  | 1.67889800  | -2.51187500 |
| H  | 3.90234600  | 2.69751300  | -3.02943200 |
| H  | 3.54944900  | 3.76470400  | 0.43566400  |
| H  | 3.42162200  | 4.15189800  | -1.27364900 |

|    |             |             |             |
|----|-------------|-------------|-------------|
| H  | 2.16582700  | 3.17212200  | -0.51199000 |
| H  | 5.72592100  | 3.36000300  | -1.49151100 |
| H  | 5.90562600  | 2.64651600  | 0.10924800  |
| H  | 6.17288500  | 1.66697400  | -1.34145800 |
| C  | 3.44698400  | 1.13853800  | 2.01849500  |
| C  | 2.13915700  | 1.93298500  | 2.24617600  |
| C  | 3.34882900  | -0.11820500 | 2.91075400  |
| C  | 4.64976900  | 1.98563600  | 2.48600000  |
| H  | 2.09082000  | 2.86845000  | 1.69322200  |
| H  | 1.25487300  | 1.34454600  | 1.98685200  |
| H  | 2.07540700  | 2.17890500  | 3.31247700  |
| H  | 4.27341500  | -0.69584300 | 2.94562400  |
| H  | 3.13954600  | 0.21212400  | 3.93404300  |
| H  | 2.52936900  | -0.77665800 | 2.60846200  |
| H  | 4.54012700  | 2.17468200  | 3.55978600  |
| H  | 5.60720600  | 1.48186100  | 2.34239100  |
| H  | 4.69573500  | 2.95915100  | 1.99508900  |
| C  | -2.02947200 | -1.77140600 | 1.61020500  |
| C  | -3.34071300 | -1.53779500 | 2.12524300  |
| H  | -3.40039900 | -0.73943600 | 2.86399700  |
| C  | -4.88673600 | 1.35571000  | -0.24071200 |
| C  | -4.80466500 | 2.44680000  | -1.11388100 |
| C  | -5.56554000 | 1.47962000  | 0.97588100  |
| C  | -5.38023900 | 3.66607800  | -0.75481700 |
| H  | -4.30001300 | 2.34152300  | -2.06815900 |
| C  | -6.14508300 | 2.70038700  | 1.32601600  |
| H  | -5.64591500 | 0.62785400  | 1.64110100  |
| C  | -6.04987400 | 3.79407800  | 0.46394900  |
| H  | -5.31429700 | 4.51149100  | -1.43299200 |
| H  | -6.67426100 | 2.79338800  | 2.26969400  |
| H  | -6.50452900 | 4.74163000  | 0.73665000  |
| C  | -4.52617100 | -2.05319700 | 1.70390400  |
| H  | -4.61733300 | -2.81177800 | 0.93950100  |
| H  | -5.45389900 | -1.75048500 | 2.17871700  |
| H  | -1.27640600 | -1.08372600 | 1.98587600  |
| Se | -4.20445200 | -0.35740400 | -0.81659300 |
| C  | -1.45824100 | -3.03708800 | 1.15825700  |
| C  | -2.20342100 | -4.20131400 | 0.86043400  |
| C  | -0.04885400 | -3.13318200 | 1.08019000  |
| C  | -1.57071700 | -5.38233100 | 0.48682300  |
| H  | -3.27994800 | -4.19937700 | 0.95570800  |
| C  | 0.58294100  | -4.31639500 | 0.70941300  |
| H  | 0.55175000  | -2.26535700 | 1.33838600  |
| C  | -0.17627300 | -5.44781300 | 0.40220600  |

|                                              |                |             |                             |
|----------------------------------------------|----------------|-------------|-----------------------------|
| H                                            | -2.16850900    | -6.26338500 | 0.27366300                  |
| H                                            | 1.66730000     | -4.36193200 | 0.67352400                  |
| H                                            | 0.31149400     | -6.37586200 | 0.12018200                  |
| Zero-point correction=                       |                |             | 0.766116 (Hartree/Particle) |
| Thermal correction to Energy=                |                |             | 0.812898                    |
| Thermal correction to Enthalpy=              |                |             | 0.813842                    |
| Thermal correction to Gibbs Free Energy=     |                |             | 0.684453                    |
| Sum of electronic and zero-point Energies=   |                |             | -4426.592837                |
| Sum of electronic and thermal Energies=      |                |             | -4426.546055                |
| Sum of electronic and thermal Enthalpies=    |                |             | -4426.545111                |
| Sum of electronic and thermal Free Energies= |                |             | -4426.674500                |
| E(RB3LYP) =                                  | -4430.72354984 | A.U.        |                             |

G-tds1

1 1

|    |             |             |             |
|----|-------------|-------------|-------------|
| C  | -1.86609100 | -0.62062000 | 0.37802800  |
| C  | -1.74373200 | -0.47308000 | 1.80902000  |
| O  | -0.99198300 | -1.13286900 | 2.52529700  |
| O  | -2.52413300 | 0.52108600  | 2.34713200  |
| C  | -2.35057500 | 0.73585500  | 3.76076000  |
| H  | -1.32452300 | 1.03767700  | 3.98365400  |
| H  | -3.04729000 | 1.53234900  | 4.02272400  |
| H  | -2.57944900 | -0.17281000 | 4.32084000  |
| C  | -1.50025100 | -1.90092200 | -0.31054400 |
| C  | -1.39762900 | -3.13028100 | 0.40326700  |
| C  | -1.32037100 | -1.97047800 | -1.72548500 |
| C  | -1.15189300 | -4.32890500 | -0.25972900 |
| H  | -1.51204600 | -3.12052700 | 1.47914600  |
| C  | -1.09288800 | -3.18546400 | -2.37524400 |
| H  | -1.39697800 | -1.06643100 | -2.32146100 |
| C  | -1.01119200 | -4.37302200 | -1.65065400 |
| H  | -1.08953000 | -5.24502600 | 0.32047200  |
| H  | -0.98229100 | -3.19315000 | -3.45555900 |
| H  | -0.83920100 | -5.31716700 | -2.15733200 |
| P  | 3.07574100  | -0.73007900 | 0.05383300  |
| Au | 0.77363200  | -1.02172100 | -0.10549300 |
| C  | 3.57684200  | 0.85923900  | -0.92999700 |
| C  | 2.79778500  | 0.89916800  | -2.26657200 |
| C  | 3.14042300  | 2.11025000  | -0.13989900 |
| C  | 5.09079000  | 0.94928600  | -1.21747300 |
| H  | 3.04989100  | 0.08732000  | -2.94612900 |
| H  | 1.71681400  | 0.88384800  | -2.10007300 |
| H  | 3.04350400  | 1.83932300  | -2.77340400 |
| H  | 3.71586700  | 2.26170200  | 0.77417400  |

|   |             |             |             |
|---|-------------|-------------|-------------|
| H | 3.30361900  | 2.98942300  | -0.77202000 |
| H | 2.07635200  | 2.08723100  | 0.10886000  |
| H | 5.28962400  | 1.90373200  | -1.71792600 |
| H | 5.69733600  | 0.92706000  | -0.31005700 |
| H | 5.44037700  | 0.16008400  | -1.88534100 |
| C | 3.50436500  | -0.55761900 | 1.93446400  |
| C | 2.45927600  | 0.35827200  | 2.61660700  |
| C | 3.37825300  | -1.93352300 | 2.62473500  |
| C | 4.92223700  | 0.00012100  | 2.17929800  |
| H | 2.43280200  | 1.36848300  | 2.21115900  |
| H | 1.45359000  | -0.06887100 | 2.56436800  |
| H | 2.72873600  | 0.43834100  | 3.67632100  |
| H | 4.15899600  | -2.63656600 | 2.33125200  |
| H | 3.47822400  | -1.77617400 | 3.70429000  |
| H | 2.39930600  | -2.38962300 | 2.45366900  |
| H | 5.11674600  | -0.01283300 | 3.25765800  |
| H | 5.70114100  | -0.59744700 | 1.70202800  |
| H | 5.03068900  | 1.03481200  | 1.84822400  |
| C | 3.90821600  | -2.30758300 | -0.70635500 |
| C | 3.13482200  | -3.56884700 | -0.25271300 |
| C | 3.78898300  | -2.26382200 | -2.24506800 |
| C | 5.39549600  | -2.45131000 | -0.31979200 |
| H | 3.15174000  | -3.73286800 | 0.82293100  |
| H | 2.09128500  | -3.54165500 | -0.57909900 |
| H | 3.60711900  | -4.43893800 | -0.72309100 |
| H | 4.40911100  | -1.49260200 | -2.70393100 |
| H | 4.13295100  | -3.22703200 | -2.63775000 |
| H | 2.75292400  | -2.13073900 | -2.56980200 |
| H | 5.80523800  | -3.32311500 | -0.84216000 |
| H | 5.99646500  | -1.58741400 | -0.60990500 |
| H | 5.53524400  | -2.62458300 | 0.74853700  |
| C | -1.32847900 | 3.94285600  | -0.58029000 |
| H | -1.96065400 | 4.19250800  | -1.43356400 |
| C | -1.75526200 | 2.98259000  | 0.26231900  |
| H | -1.14842300 | 2.66967700  | 1.10694900  |
| C | -4.87241500 | -0.05060800 | -0.34350800 |
| C | -5.32178200 | -0.47805100 | 0.90735100  |
| C | -5.72970900 | 0.00695200  | -1.44557300 |
| C | -6.66032000 | -0.84486400 | 1.05182500  |
| H | -4.64254700 | -0.51807300 | 1.75040000  |
| C | -7.06816000 | -0.35765500 | -1.28568300 |
| H | -5.36352200 | 0.32335100  | -2.41808100 |
| C | -7.53111100 | -0.78341400 | -0.03959800 |
| H | -7.02283600 | -1.17883900 | 2.01917800  |

|                                              |                |             |                             |
|----------------------------------------------|----------------|-------------|-----------------------------|
| H                                            | -7.74211400    | -0.31637800 | -2.13563600                 |
| H                                            | -8.57052500    | -1.07228400 | 0.08107300                  |
| C                                            | -3.08115000    | 2.33639600  | 0.13630200                  |
| H                                            | -3.58496900    | 2.18215100  | 1.08723100                  |
| H                                            | -3.73887300    | 2.83869400  | -0.57641300                 |
| Se                                           | -3.01422900    | 0.47055500  | -0.67071300                 |
| C                                            | -0.09147600    | 4.72440800  | -0.47821400                 |
| C                                            | 0.65254800     | 4.81839900  | 0.71387600                  |
| C                                            | 0.36082300     | 5.43315700  | -1.60589700                 |
| C                                            | 1.81746100     | 5.57873900  | 0.76523700                  |
| H                                            | 0.29844100     | 4.32171200  | 1.61222100                  |
| C                                            | 1.53150400     | 6.18784800  | -1.55645100                 |
| H                                            | -0.21190300    | 5.38627100  | -2.52859800                 |
| C                                            | 2.26472000     | 6.26210500  | -0.37054800                 |
| H                                            | 2.37019200     | 5.65523100  | 1.69700600                  |
| H                                            | 1.86445800     | 6.72676600  | -2.43827800                 |
| H                                            | 3.16825500     | 6.86248700  | -0.32433400                 |
| Zero-point correction=                       |                |             | 0.766414 (Hartree/Particle) |
| Thermal correction to Energy=                |                |             | 0.813236                    |
| Thermal correction to Enthalpy=              |                |             | 0.814180                    |
| Thermal correction to Gibbs Free Energy=     |                |             | 0.681985                    |
| Sum of electronic and zero-point Energies=   |                |             | -4426.597094                |
| Sum of electronic and thermal Energies=      |                |             | -4426.550272                |
| Sum of electronic and thermal Enthalpies=    |                |             | -4426.549328                |
| Sum of electronic and thermal Free Energies= |                |             | -4426.681523                |
| E(RB3LYP) =                                  | -4430.71872126 | A.U.        |                             |

G-td2

|     |            |             |             |
|-----|------------|-------------|-------------|
| 1 1 |            |             |             |
| C   | 2.51196900 | 0.40151400  | 0.45315600  |
| C   | 1.59809600 | 1.14293700  | 1.28109600  |
| O   | 0.34234600 | 1.14763800  | 1.24663900  |
| O   | 2.20830000 | 1.96454600  | 2.15552200  |
| C   | 1.38498800 | 2.71784200  | 3.06467300  |
| H   | 0.79720800 | 2.04568100  | 3.69393500  |
| H   | 2.08423300 | 3.29014300  | 3.67292400  |
| H   | 0.71369100 | 3.38471000  | 2.52050600  |
| C   | 2.04439800 | -0.79634000 | -0.29412200 |
| C   | 1.25349300 | -1.76312700 | 0.35819000  |
| C   | 2.45884700 | -1.07115100 | -1.60797500 |
| C   | 0.88300400 | -2.94541200 | -0.28387100 |
| H   | 0.96600700 | -1.60439000 | 1.39314700  |
| C   | 2.08101600 | -2.24818700 | -2.25457800 |



|    |             |             |             |
|----|-------------|-------------|-------------|
| H  | 3.11221200  | -0.37742200 | -2.12413000 |
| C  | 1.28993000  | -3.19082600 | -1.59689300 |
| H  | 0.29690100  | -3.68518300 | 0.25384900  |
| H  | 2.42163700  | -2.43501400 | -3.26858300 |
| H  | 1.01094900  | -4.11472100 | -2.09443500 |
| P  | -3.55805200 | -0.66571900 | 0.06304900  |
| Au | -1.44327800 | 0.17660900  | 0.49957800  |
| C  | -3.57430400 | -1.48735700 | -1.68840500 |
| C  | -2.78003700 | -0.59546400 | -2.67096000 |
| C  | -2.82837400 | -2.83775500 | -1.63667000 |
| C  | -4.99654100 | -1.71998100 | -2.23971800 |
| H  | -3.21935900 | 0.38897800  | -2.81846000 |
| H  | -1.74517200 | -0.46193500 | -2.34510600 |
| H  | -2.76254500 | -1.09822500 | -3.64482700 |
| H  | -3.36043700 | -3.60126600 | -1.06781700 |
| H  | -2.73641100 | -3.20933200 | -2.66328200 |
| H  | -1.81617100 | -2.72965400 | -1.23822800 |
| H  | -4.91316100 | -2.25588100 | -3.19186600 |
| H  | -5.61448300 | -2.32941900 | -1.57821100 |
| H  | -5.52716700 | -0.78851500 | -2.44518900 |
| C  | -3.96127300 | -1.96750100 | 1.44005600  |
| C  | -2.72155300 | -2.86120100 | 1.68046400  |
| C  | -4.23151800 | -1.24384300 | 2.77761700  |
| C  | -5.17414400 | -2.85880600 | 1.09820600  |
| H  | -2.41781100 | -3.43314100 | 0.80613300  |
| H  | -1.86486200 | -2.27310000 | 2.02108400  |
| H  | -2.96971400 | -3.57653700 | 2.47273600  |
| H  | -5.16798900 | -0.68474200 | 2.78400400  |
| H  | -4.30647800 | -2.00382500 | 3.56306100  |
| H  | -3.41308600 | -0.57155300 | 3.05144400  |
| H  | -5.36755200 | -3.51891700 | 1.95128900  |
| H  | -6.08609900 | -2.28618000 | 0.92034400  |
| H  | -4.99554500 | -3.50038500 | 0.23329300  |
| C  | -4.79245400 | 0.82494000  | 0.14135500  |
| C  | -4.41868100 | 1.74005600  | 1.33258500  |
| C  | -4.63527600 | 1.68832600  | -1.12900500 |
| C  | -6.26760400 | 0.39154400  | 0.27588100  |
| H  | -4.50032300 | 1.25435700  | 2.30316800  |
| H  | -3.40462000 | 2.13697600  | 1.23132200  |
| H  | -5.11017300 | 2.59041600  | 1.33405600  |
| H  | -5.00751400 | 1.19821800  | -2.02969900 |
| H  | -5.22878200 | 2.59901500  | -0.99164400 |
| H  | -3.59774800 | 1.99423100  | -1.29026900 |
| H  | -6.89475100 | 1.28927400  | 0.23713600  |

|                                              |                |             |                             |
|----------------------------------------------|----------------|-------------|-----------------------------|
| H                                            | -6.59292600    | -0.26566300 | -0.53229000                 |
| H                                            | -6.47622900    | -0.10176900 | 1.22688200                  |
| C                                            | 2.55808200     | 2.33372700  | -1.10013600                 |
| H                                            | 2.97700000     | 1.61534400  | -1.79521300                 |
| C                                            | 3.50262100     | 3.13340000  | -0.40638700                 |
| H                                            | 3.15076300     | 3.94138600  | 0.22844200                  |
| C                                            | 5.09747000     | -1.15056400 | 0.30078300                  |
| C                                            | 6.02841600     | -0.95786100 | -0.72570500                 |
| C                                            | 4.83787400     | -2.44071000 | 0.77835400                  |
| C                                            | 6.67951600     | -2.05670000 | -1.28980600                 |
| H                                            | 6.25499700     | 0.04220700  | -1.07924200                 |
| C                                            | 5.48413900     | -3.53535600 | 0.20397700                  |
| H                                            | 4.13649000     | -2.58710200 | 1.59252200                  |
| C                                            | 6.40407300     | -3.34519100 | -0.82966000                 |
| H                                            | 7.40303100     | -1.90310600 | -2.08478800                 |
| H                                            | 5.27787900     | -4.53534000 | 0.57348700                  |
| H                                            | 6.91237700     | -4.19858700 | -1.26809100                 |
| C                                            | 4.83350000     | 2.85036700  | -0.42111600                 |
| H                                            | 5.24422100     | 2.12302600  | -1.11184500                 |
| H                                            | 5.54694100     | 3.42681500  | 0.15783200                  |
| Se                                           | 4.29806100     | 0.37164500  | 1.18359000                  |
| C                                            | 1.19720800     | 2.75591400  | -1.41182000                 |
| C                                            | 0.53745300     | 3.79464400  | -0.72030400                 |
| C                                            | 0.53320200     | 2.16457300  | -2.50783900                 |
| C                                            | -0.71357800    | 4.24425900  | -1.13143400                 |
| H                                            | 1.01768500     | 4.27389300  | 0.12632800                  |
| C                                            | -0.71506200    | 2.62051200  | -2.92236400                 |
| H                                            | 1.02441900     | 1.36453300  | -3.05409300                 |
| C                                            | -1.34163300    | 3.66747100  | -2.23990100                 |
| H                                            | -1.19230400    | 5.06145400  | -0.60000000                 |
| H                                            | -1.18932400    | 2.17549000  | -3.79195700                 |
| H                                            | -2.30296400    | 4.04288700  | -2.57776000                 |
| Zero-point correction=                       |                |             | 0.766217 (Hartree/Particle) |
| Thermal correction to Energy=                |                |             | 0.813056                    |
| Thermal correction to Enthalpy=              |                |             | 0.814000                    |
| Thermal correction to Gibbs Free Energy=     |                |             | 0.684041                    |
| Sum of electronic and zero-point Energies=   |                |             | -4426.599588                |
| Sum of electronic and thermal Energies=      |                |             | -4426.552748                |
| Sum of electronic and thermal Enthalpies=    |                |             | -4426.551804                |
| Sum of electronic and thermal Free Energies= |                |             | -4426.681764                |
| E(RB3LYP) =                                  | -4430.72912008 | A.U.        |                             |

G-p1

0 1

|   |             |             |             |
|---|-------------|-------------|-------------|
| C | 0.75775900  | -0.51185900 | 0.18204900  |
| C | 0.70560100  | -1.95989200 | 0.68342900  |
| O | -0.04708300 | -2.36237600 | 1.55032000  |
| O | 1.53905200  | -2.77109800 | 0.00486100  |
| C | 1.43712500  | -4.16756100 | 0.32153700  |
| H | 0.46590600  | -4.55930300 | 0.00699700  |
| H | 2.23797300  | -4.65209600 | -0.23627600 |
| H | 1.55624700  | -4.33252600 | 1.39450400  |
| C | 2.13689900  | -0.11406500 | -0.35088100 |
| C | 3.28623800  | -0.49108000 | 0.36537400  |
| C | 2.30872900  | 0.68280100  | -1.49174900 |
| C | 4.55603200  | -0.09550500 | -0.04823700 |
| H | 3.18814200  | -1.10310200 | 1.25491600  |
| C | 3.58234800  | 1.06910100  | -1.91459100 |
| H | 1.44042100  | 1.02039800  | -2.04586500 |
| C | 4.71176200  | 0.68332400  | -1.19621600 |
| H | 5.42533000  | -0.40277600 | 0.52592200  |
| H | 3.68414800  | 1.68089000  | -2.80618100 |
| H | 5.70209100  | 0.98456100  | -1.52482000 |
| C | 0.90769900  | -0.08204800 | 3.64243200  |
| H | 0.06132400  | -0.74336100 | 3.80131900  |
| C | 1.10247100  | 0.53771400  | 2.47821500  |
| H | 1.96917400  | 1.18390800  | 2.35638400  |
| C | -2.27031900 | -0.75497500 | -0.75575000 |
| C | -3.15205700 | 0.27160300  | -1.11778500 |
| C | -2.74831400 | -1.86337400 | -0.04634000 |
| C | -4.50190400 | 0.19026600  | -0.77404800 |
| H | -2.77152300 | 1.13178100  | -1.65765900 |
| C | -4.09334700 | -1.92483600 | 0.32025800  |
| H | -2.07494800 | -2.66436000 | 0.23183500  |
| C | -4.97266500 | -0.90418300 | -0.04686300 |
| H | -5.18048800 | 0.98710200  | -1.06460900 |
| H | -4.45621000 | -2.78043900 | 0.88240800  |
| H | -6.02146500 | -0.96402300 | 0.22916300  |
| C | 0.16942400  | 0.44315700  | 1.28275900  |
| H | -0.74226200 | -0.05425500 | 1.62013200  |
| H | 1.59690900  | 0.04779000  | 4.47217800  |
| C | -0.21616700 | 1.84805100  | 0.82196100  |
| C | -1.55040900 | 2.26038200  | 0.94239700  |
| C | 0.72824900  | 2.79751100  | 0.40146600  |
| C | -1.94051800 | 3.55878900  | 0.61270000  |
| H | -2.29280300 | 1.55578200  | 1.30275800  |
| C | 0.34135400  | 4.09525100  | 0.06577700  |
| H | 1.77642000  | 2.53089100  | 0.33675500  |

|                                              |                |             |                             |
|----------------------------------------------|----------------|-------------|-----------------------------|
| C                                            | -0.99570700    | 4.48138400  | 0.16419200                  |
| H                                            | -2.98264500    | 3.84874300  | 0.71411500                  |
| H                                            | 1.09149800     | 4.80875300  | -0.26372300                 |
| H                                            | -1.29482200    | 5.49351900  | -0.09271100                 |
| Se                                           | -0.47223200    | -0.65440700 | -1.44504400                 |
| Zero-point correction=                       |                |             | 0.395443 (Hartree/Particle) |
| Thermal correction to Energy=                |                |             | 0.420524                    |
| Thermal correction to Enthalpy=              |                |             | 0.421468                    |
| Thermal correction to Gibbs Free Energy=     |                |             | 0.338566                    |
| Sum of electronic and zero-point Energies=   |                |             | -3477.247956                |
| Sum of electronic and thermal Energies=      |                |             | -3477.222875                |
| Sum of electronic and thermal Enthalpies=    |                |             | -3477.221931                |
| Sum of electronic and thermal Free Energies= |                |             | -3477.304833                |
| E(RB3LYP) =                                  | -3480.20393779 | A.U.        |                             |
